# Supplementary material for: Acylation of Oleanolic Acid Oximes Effectively Improves Cytotoxic Activity in In Vitro Studies
Source: MDPI journal article supplement (doi:10.3390/pharmaceutics16010086), 2024-01-09

oleanolic acid (OA, 1)

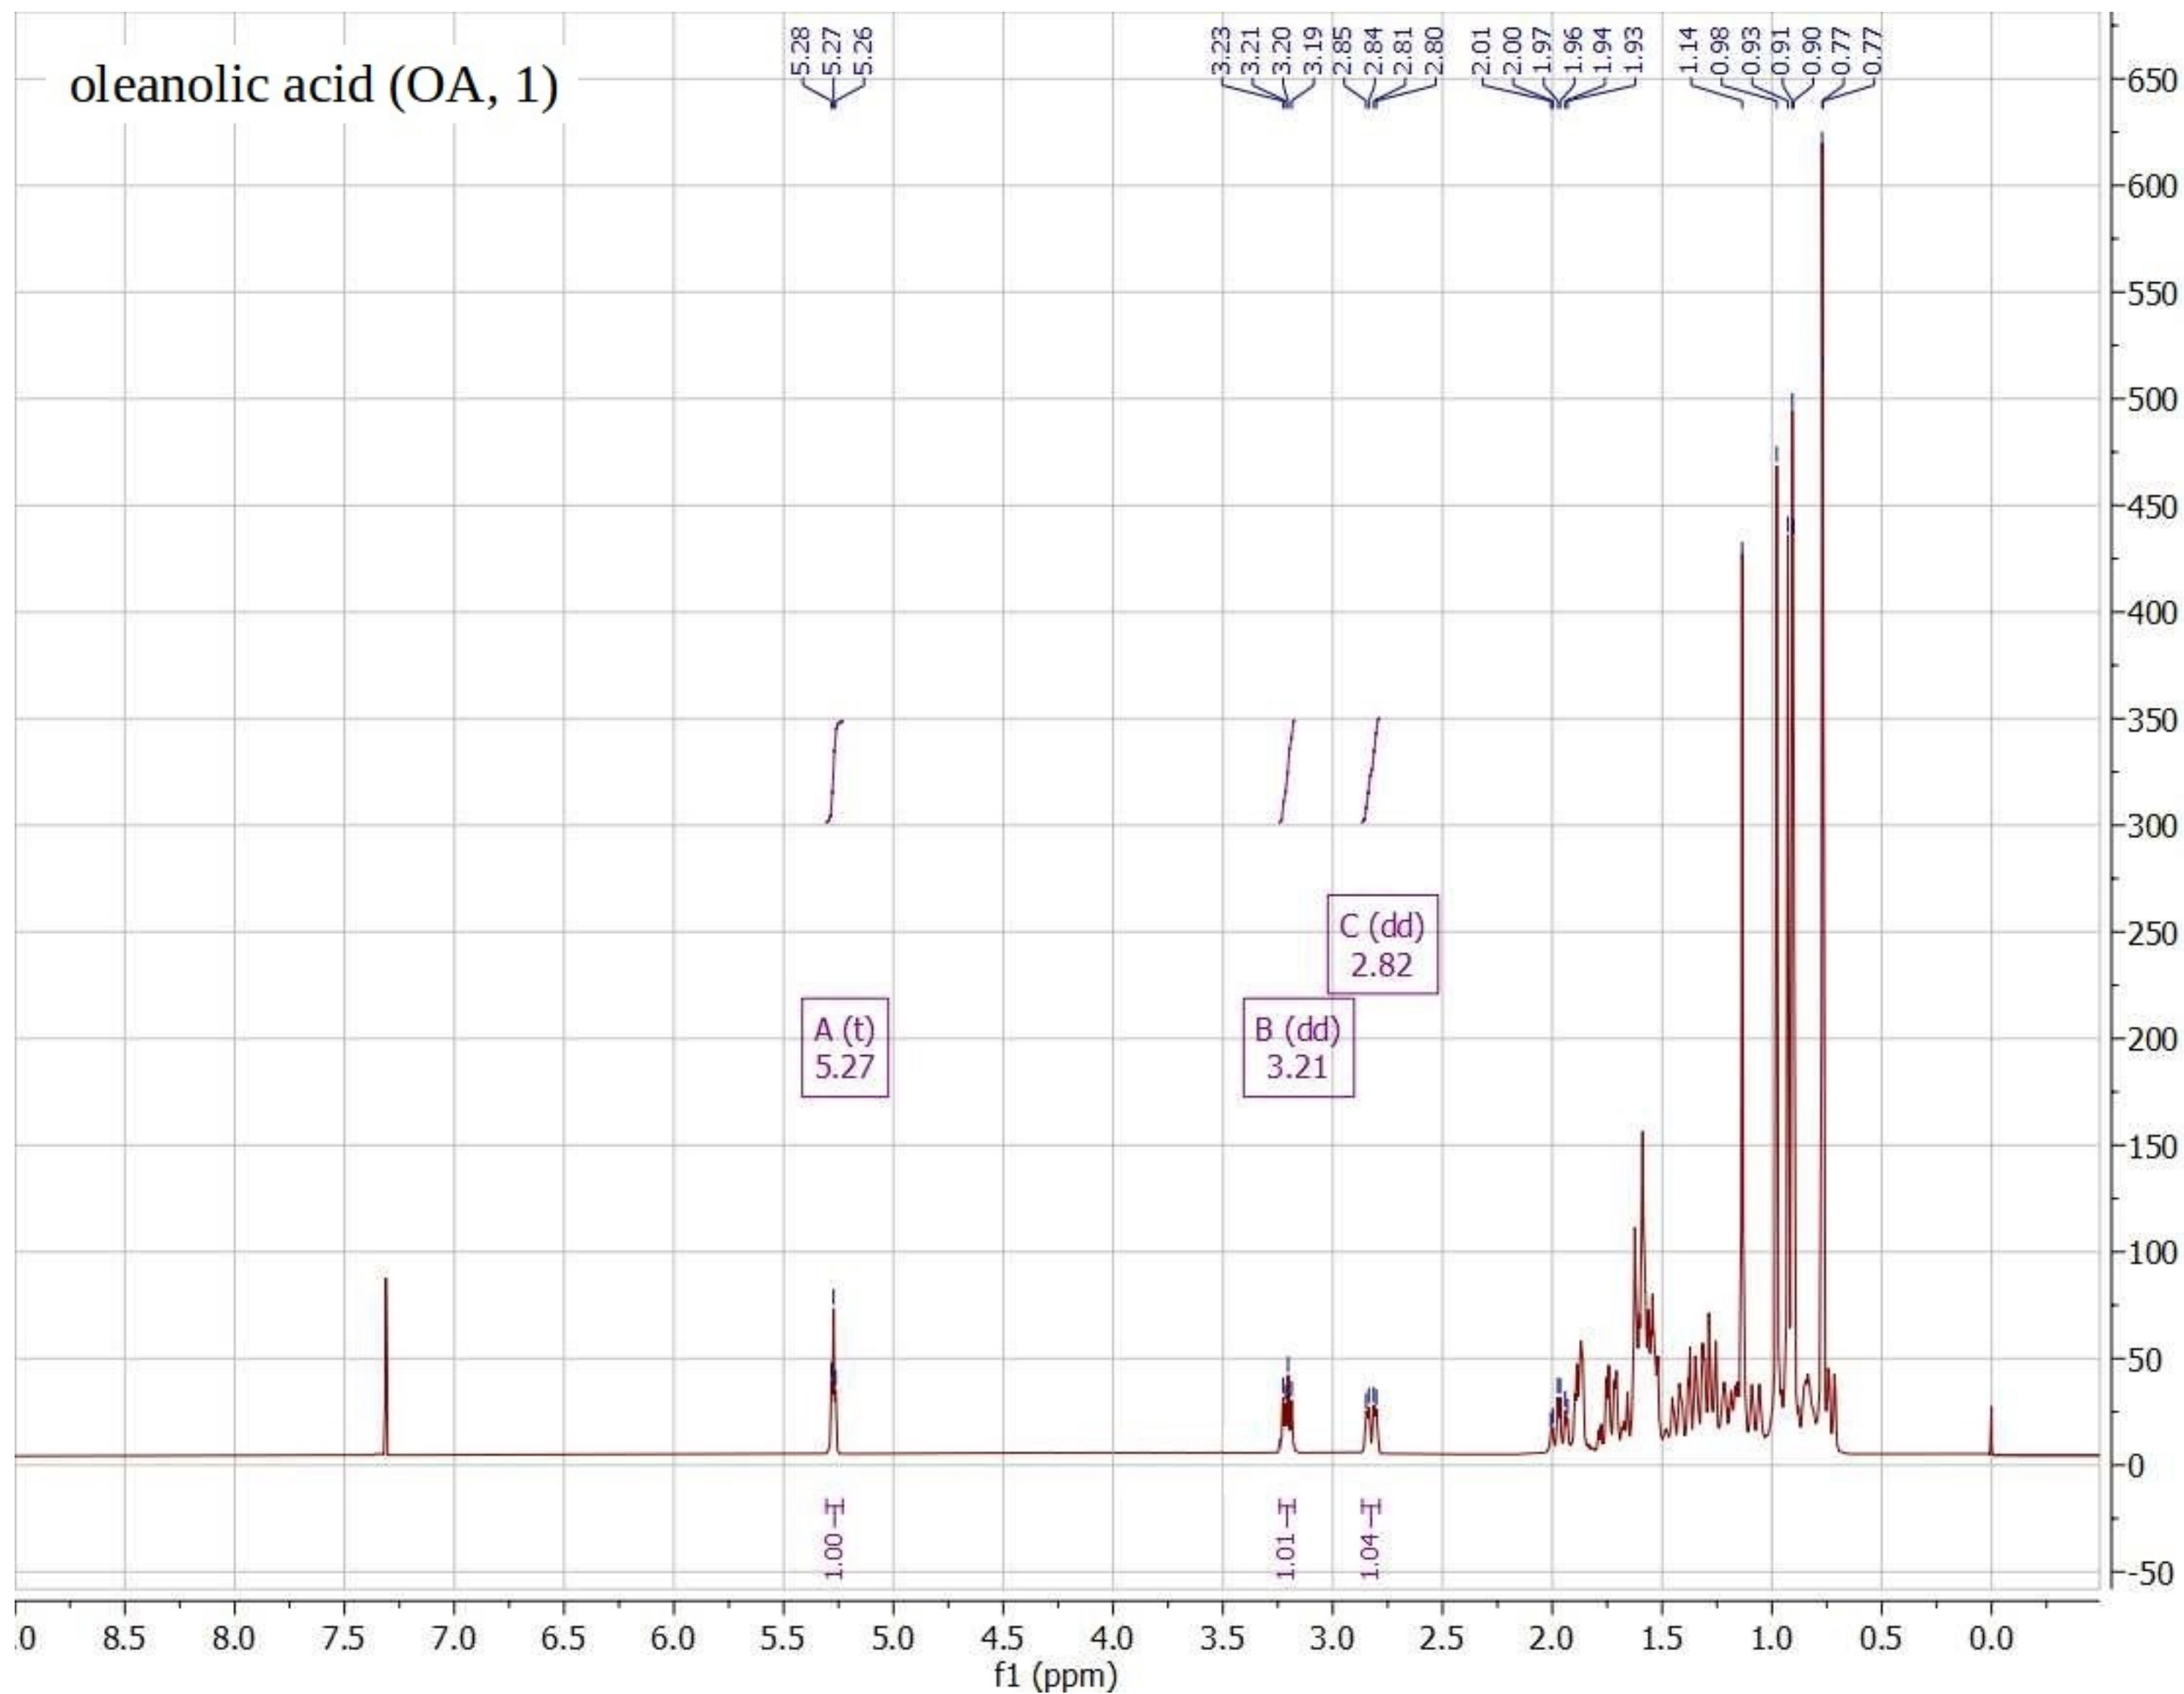

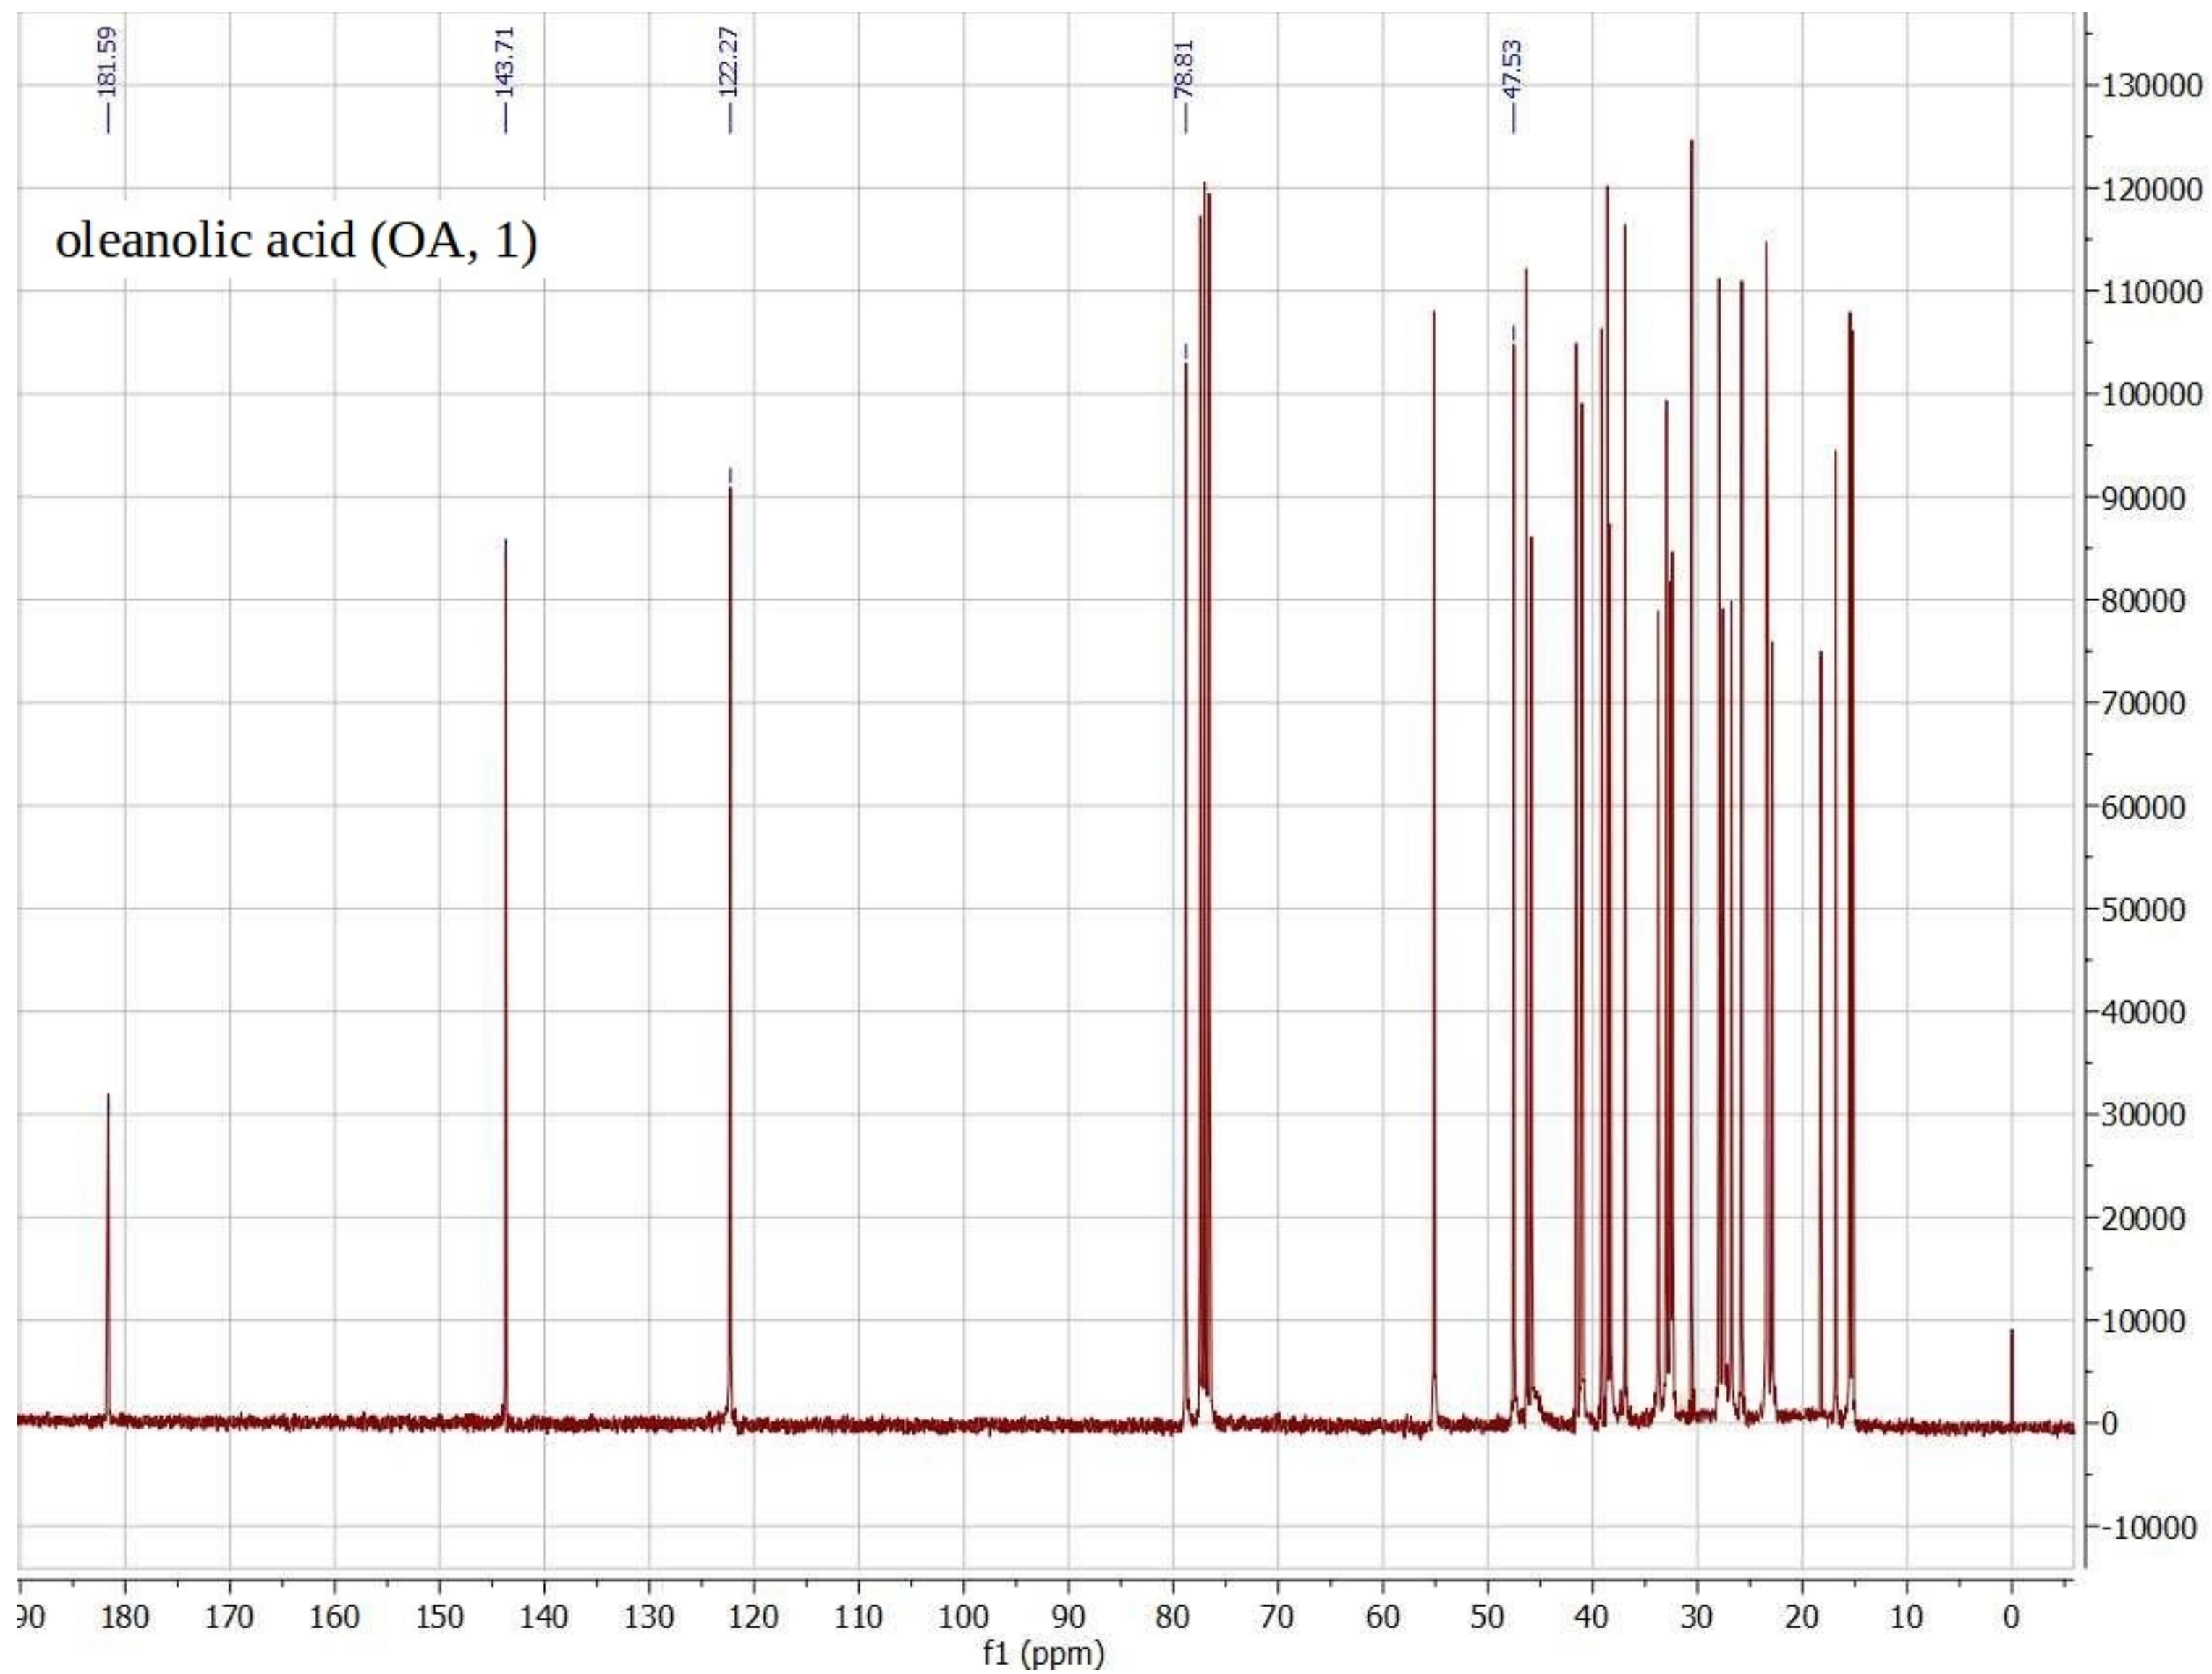

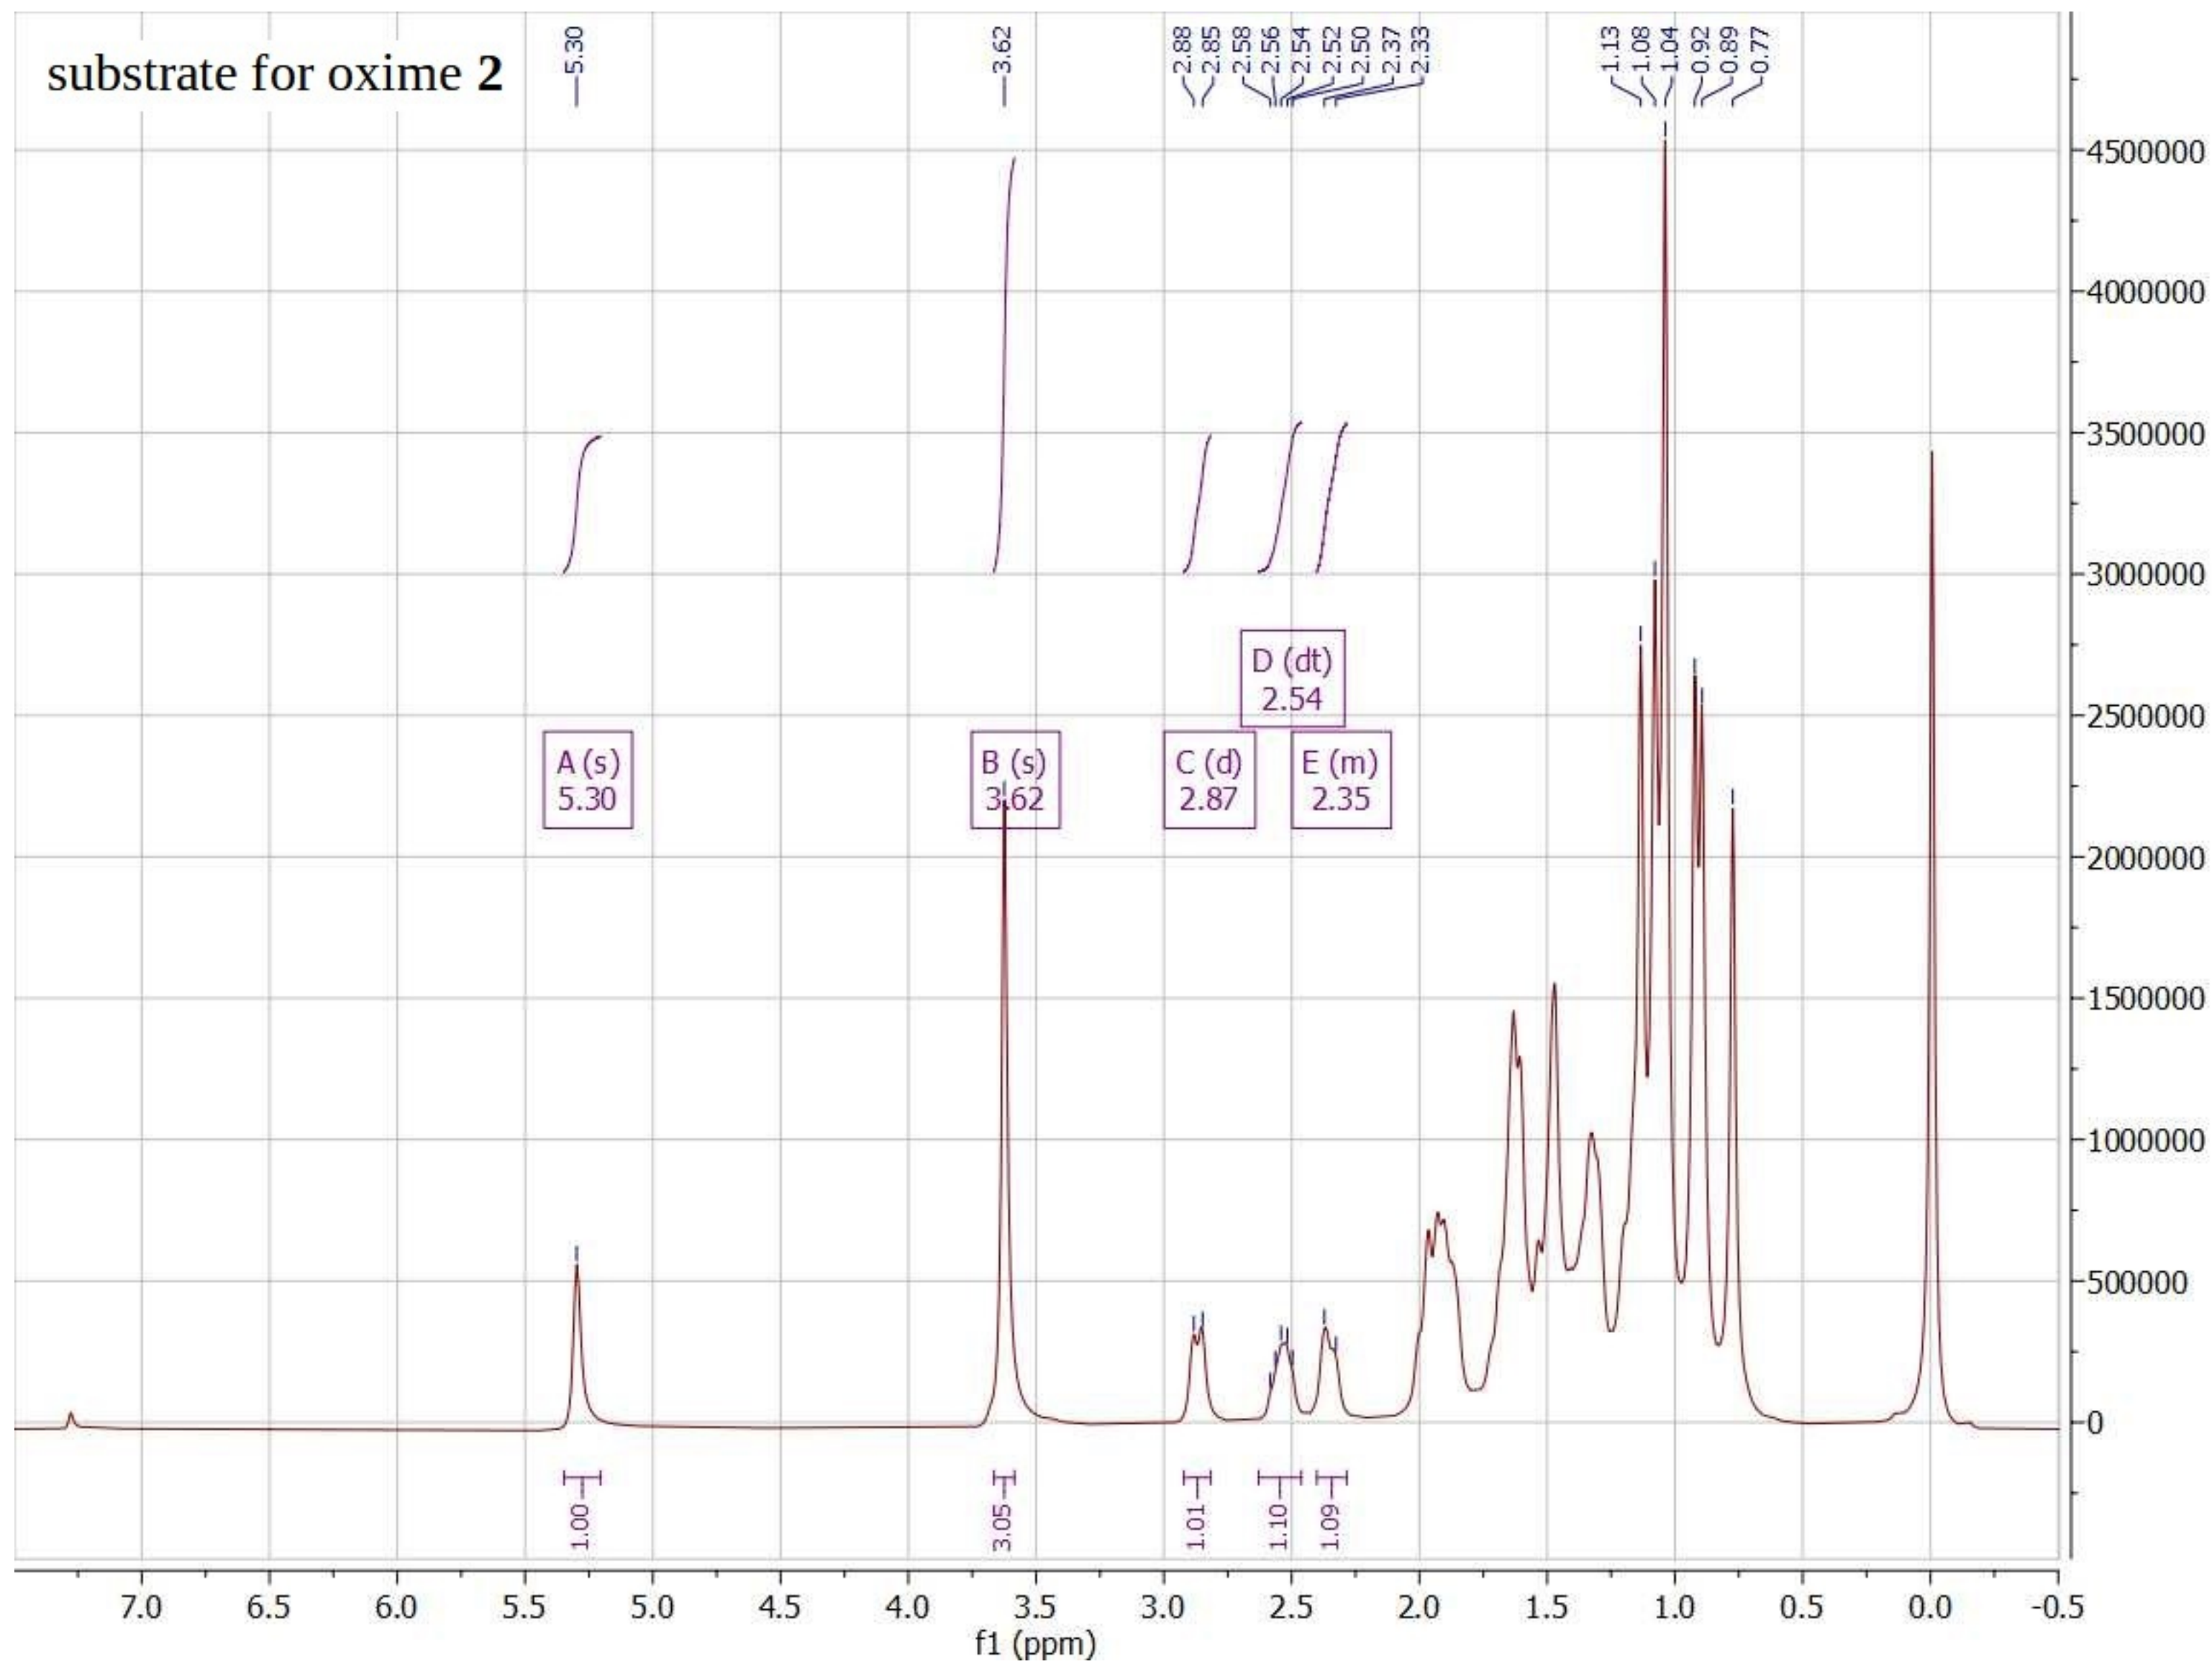



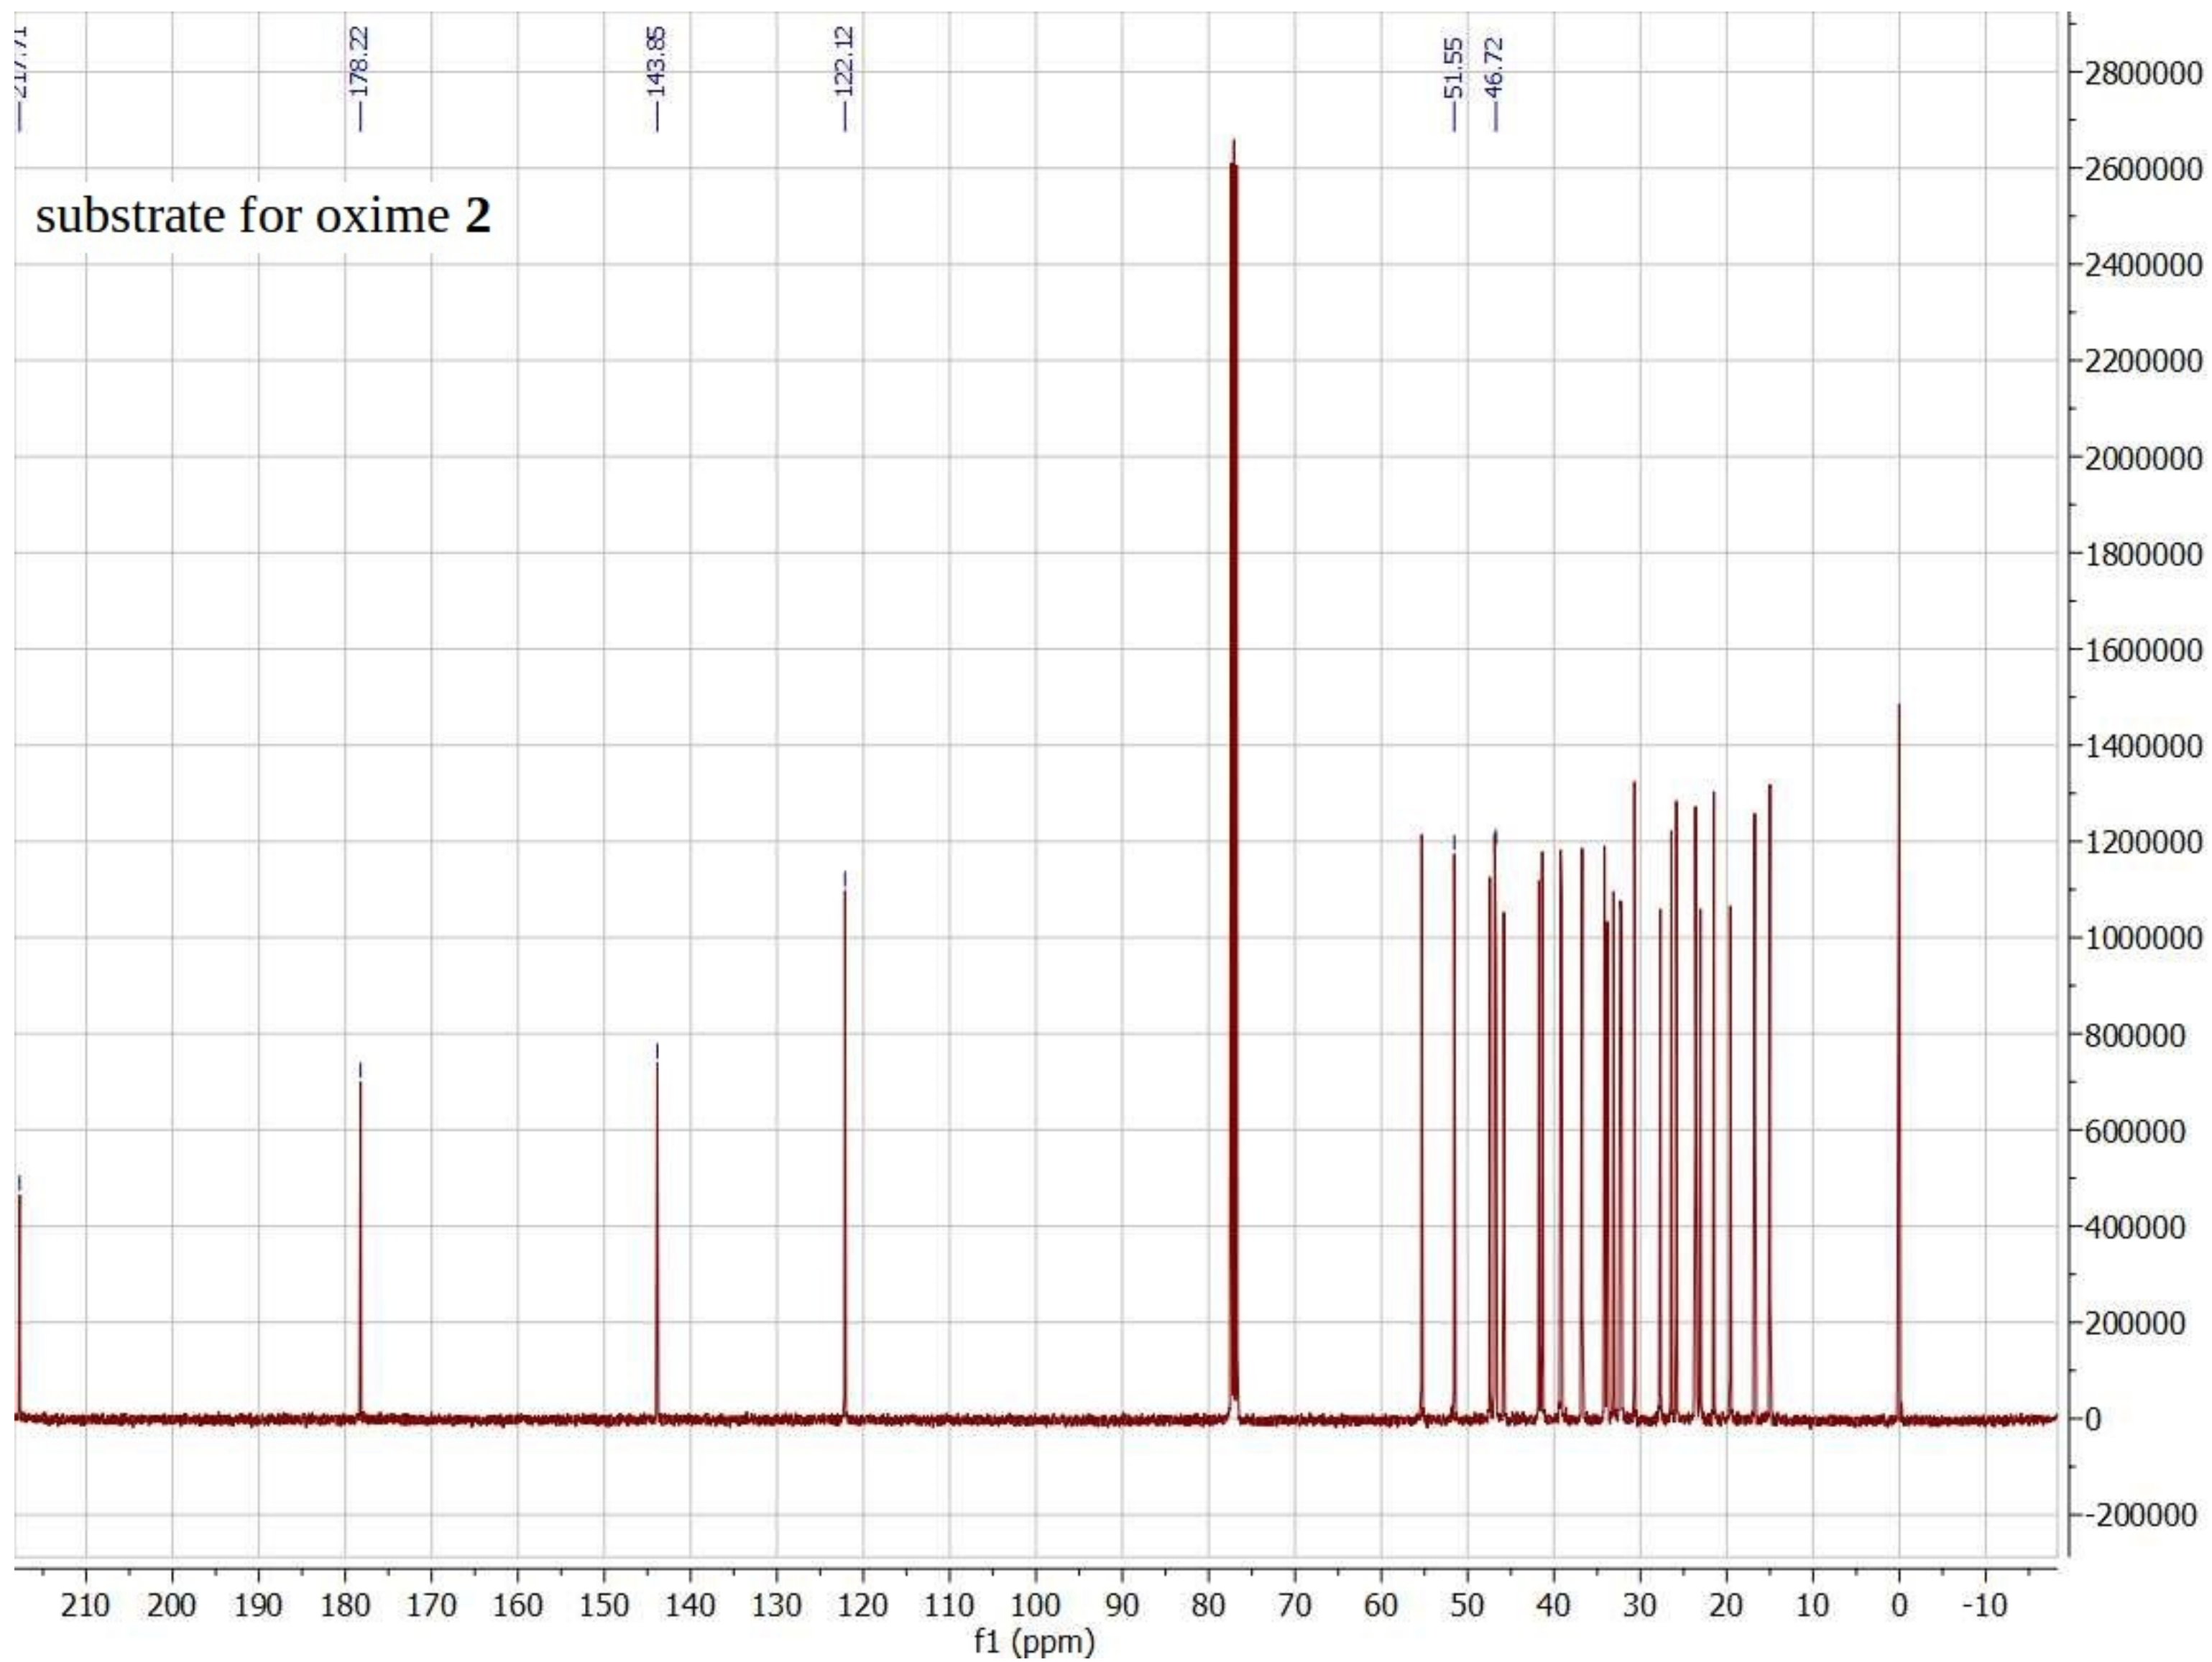

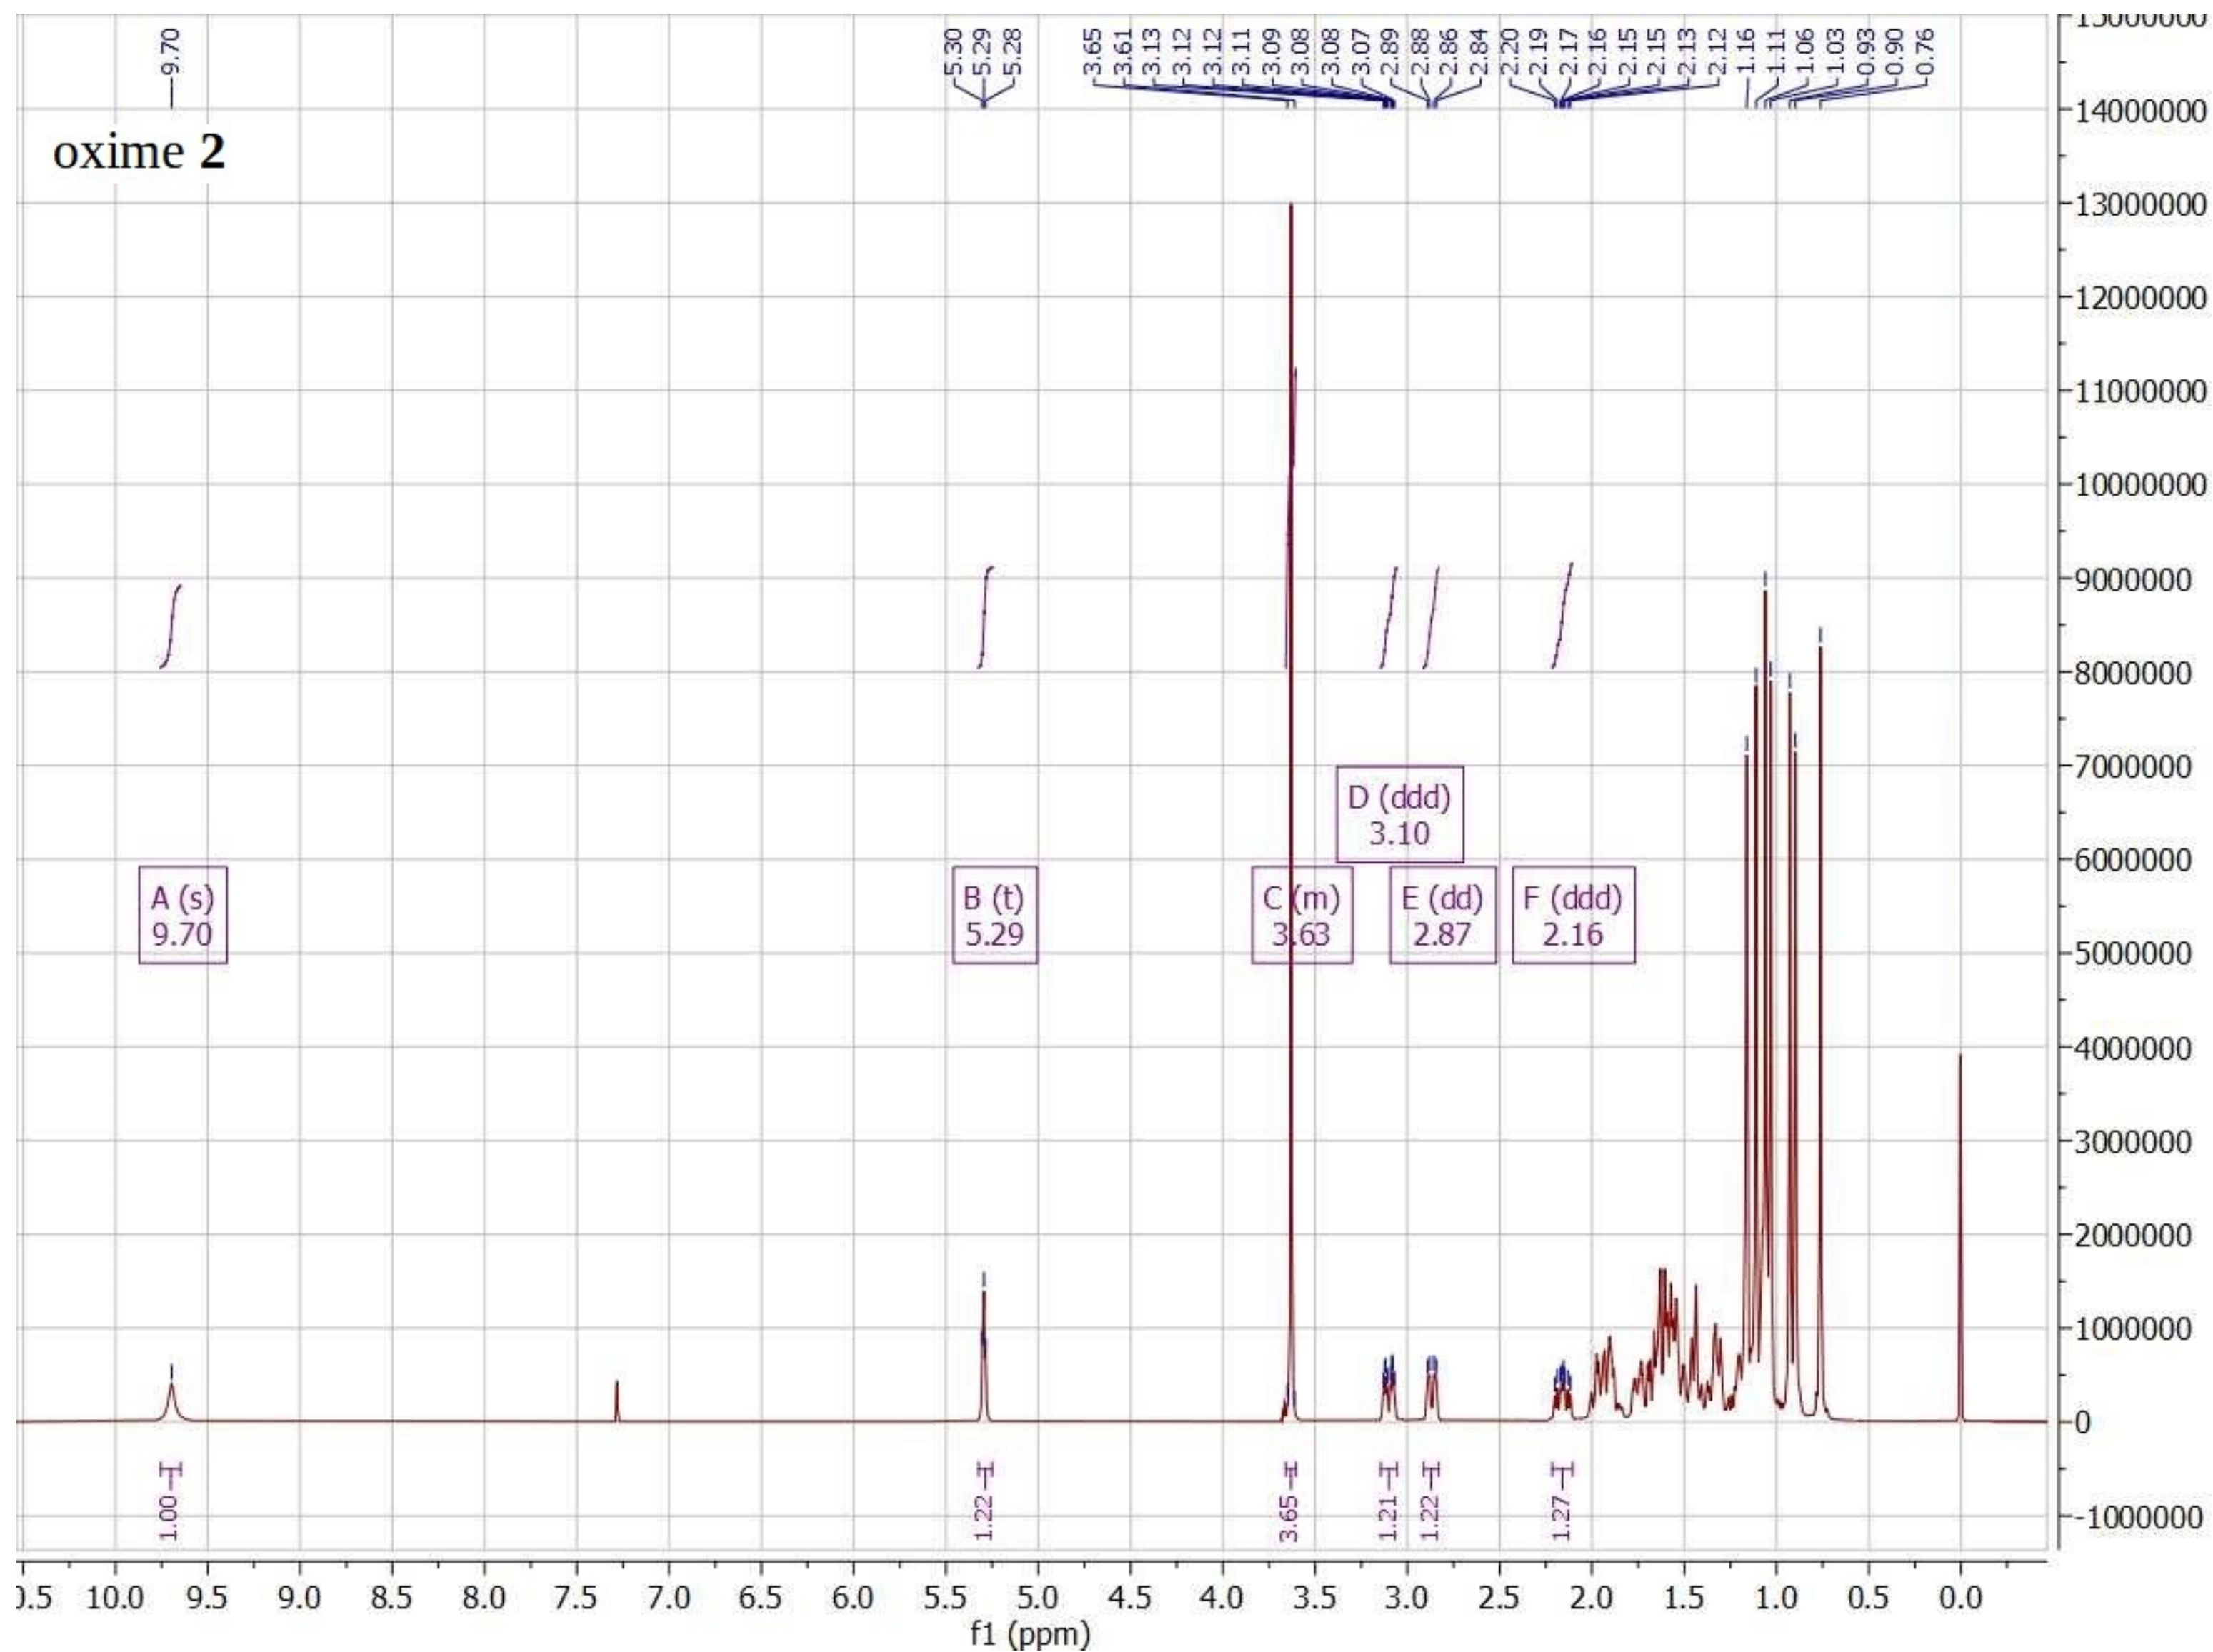

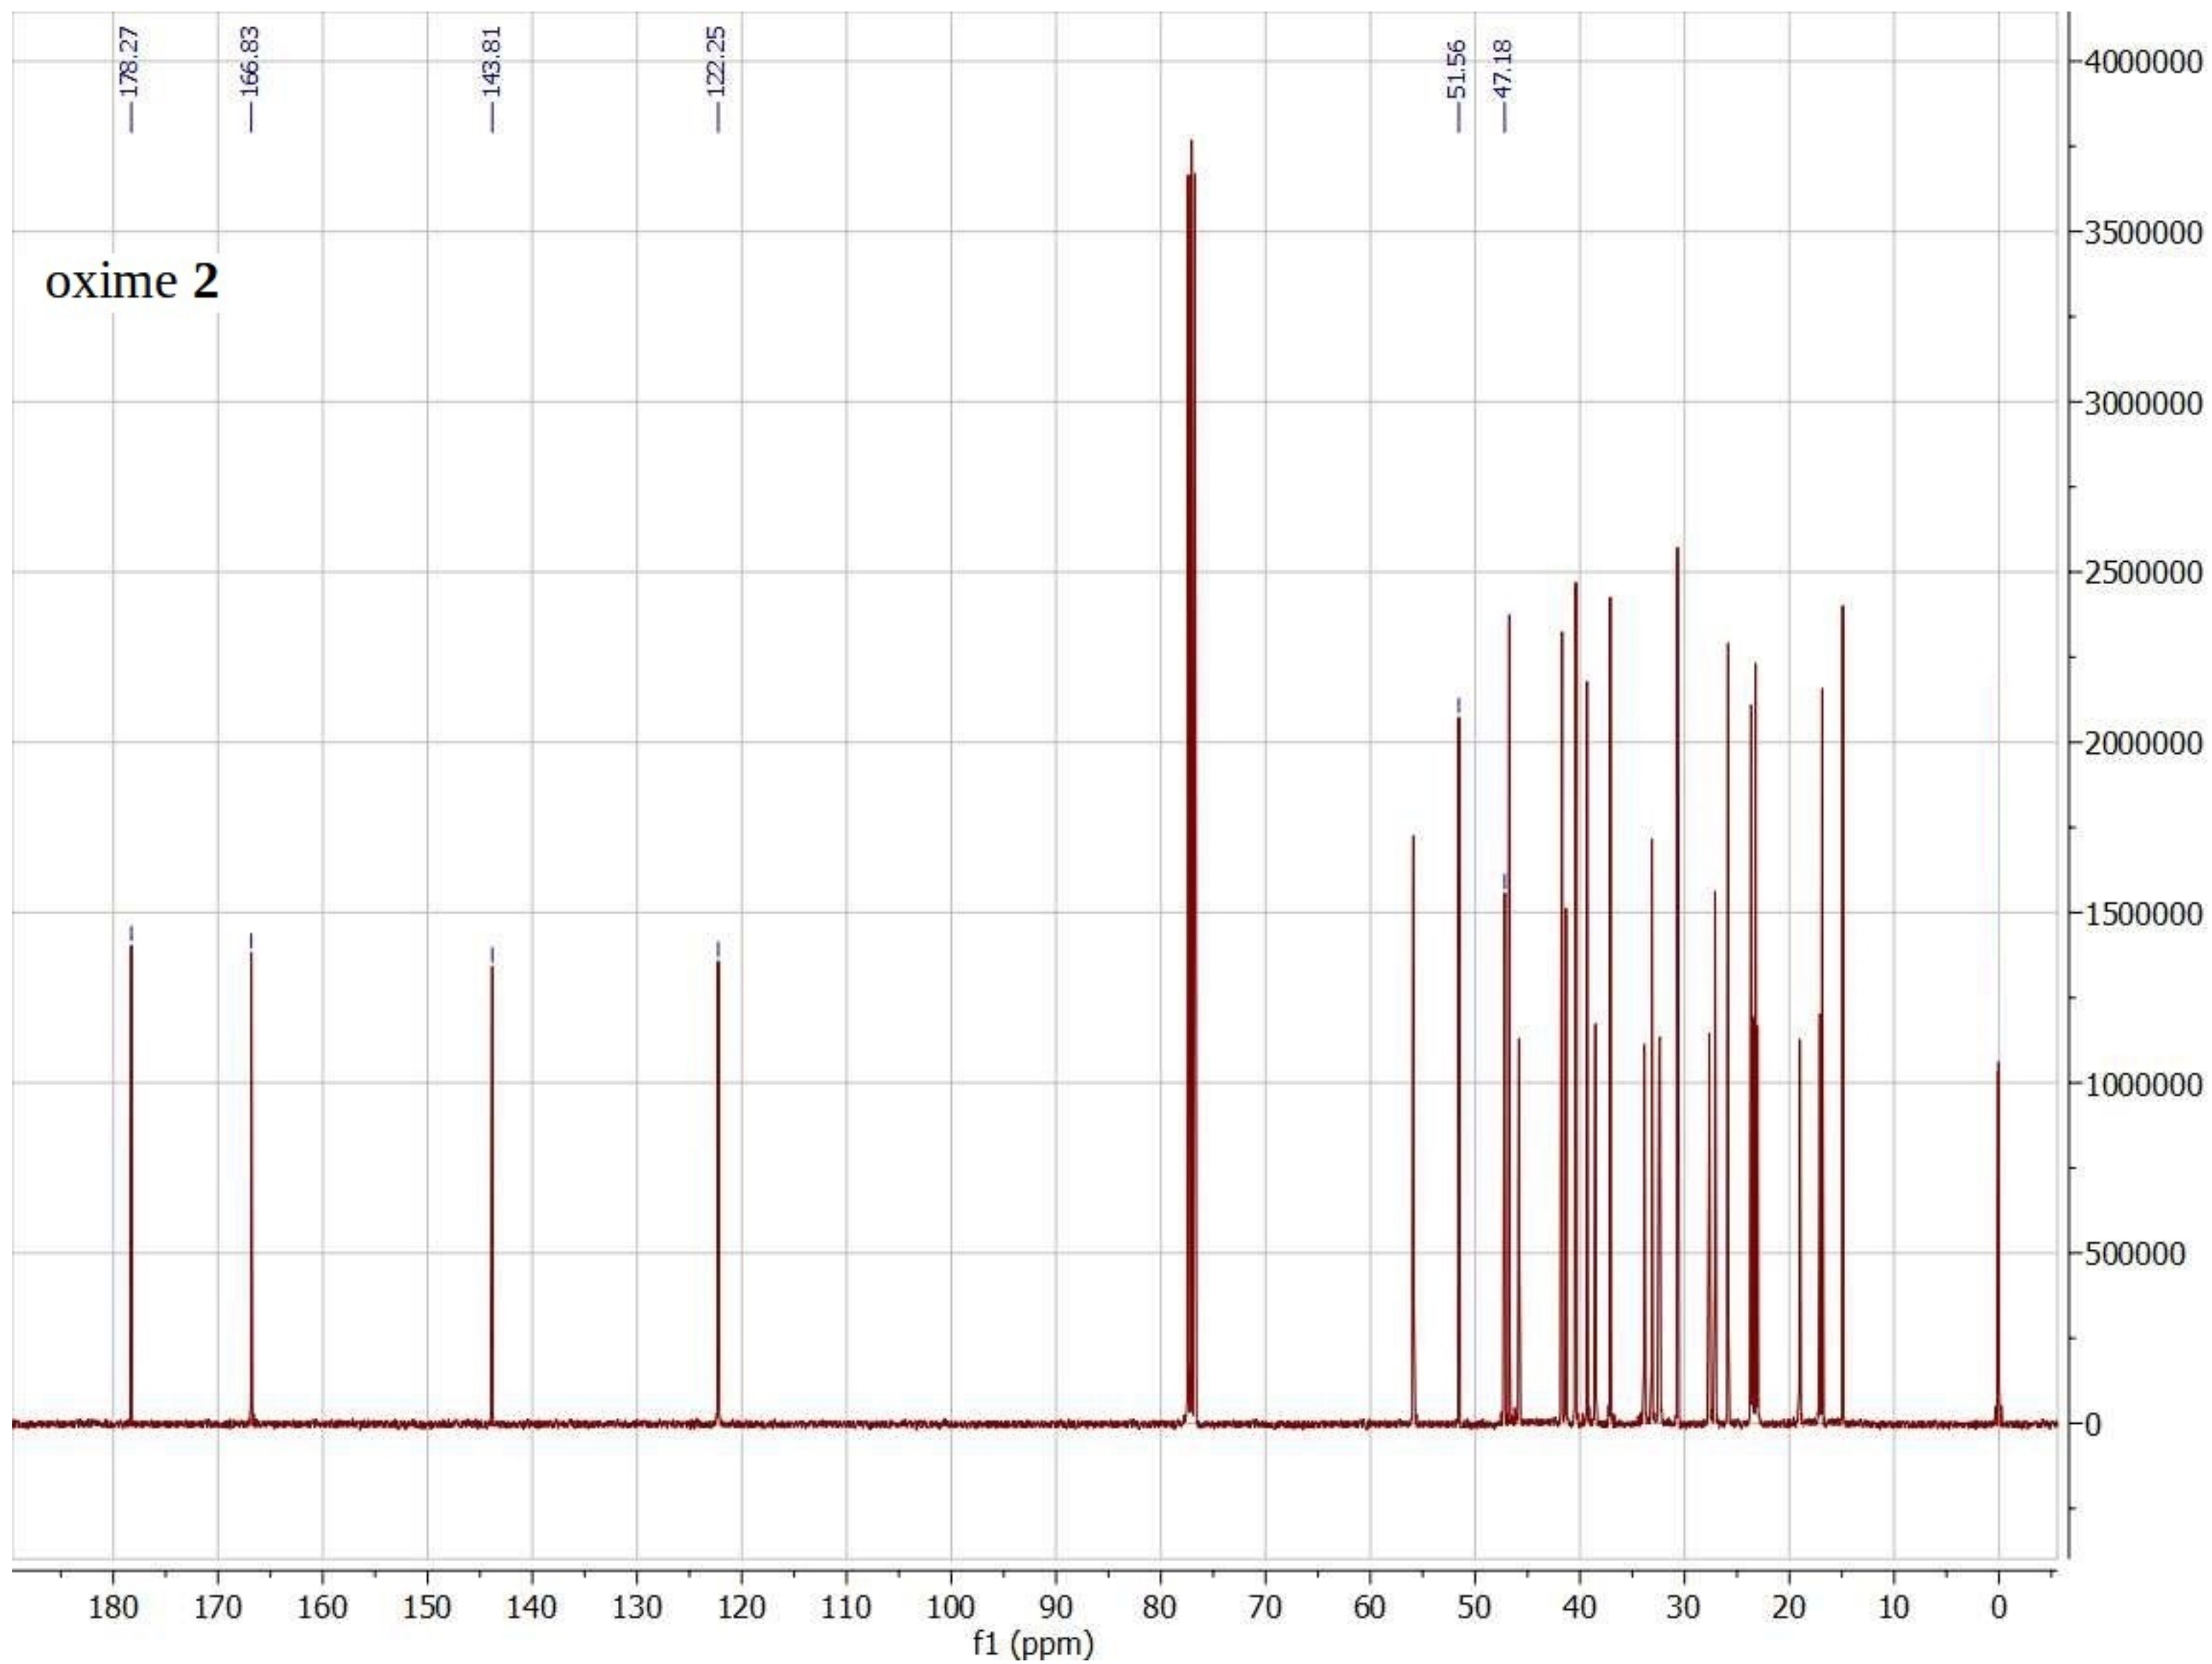



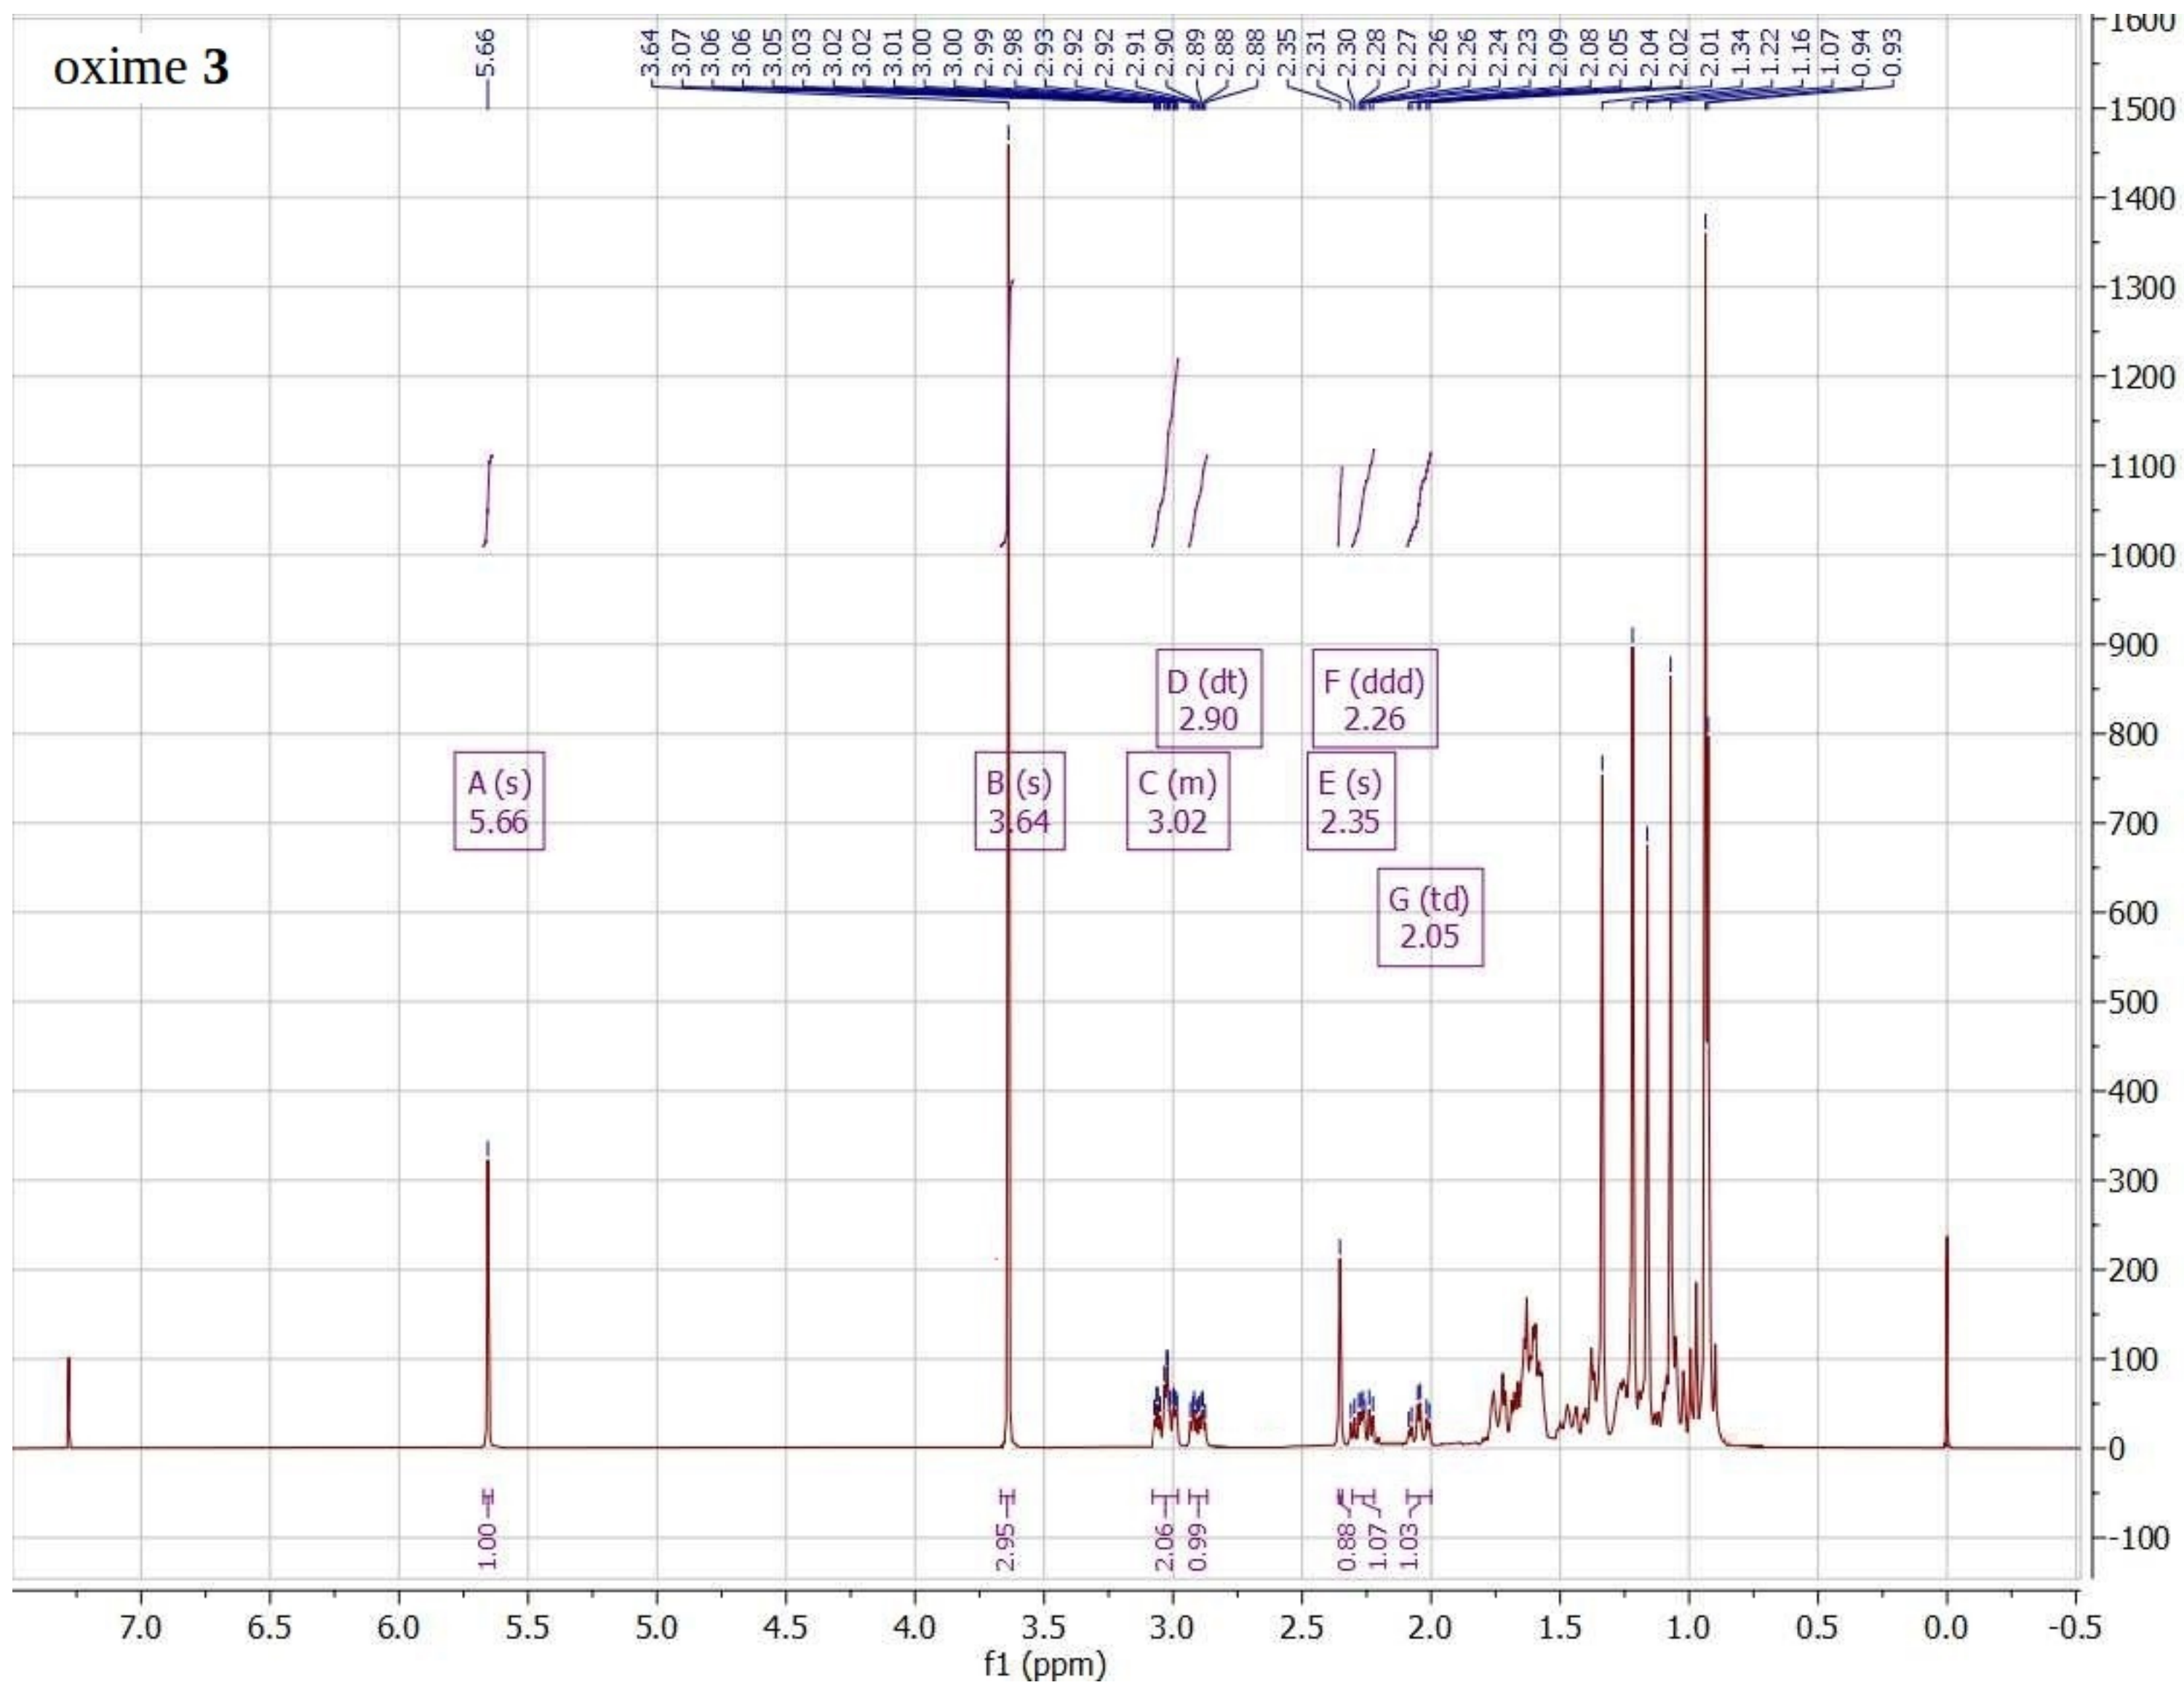

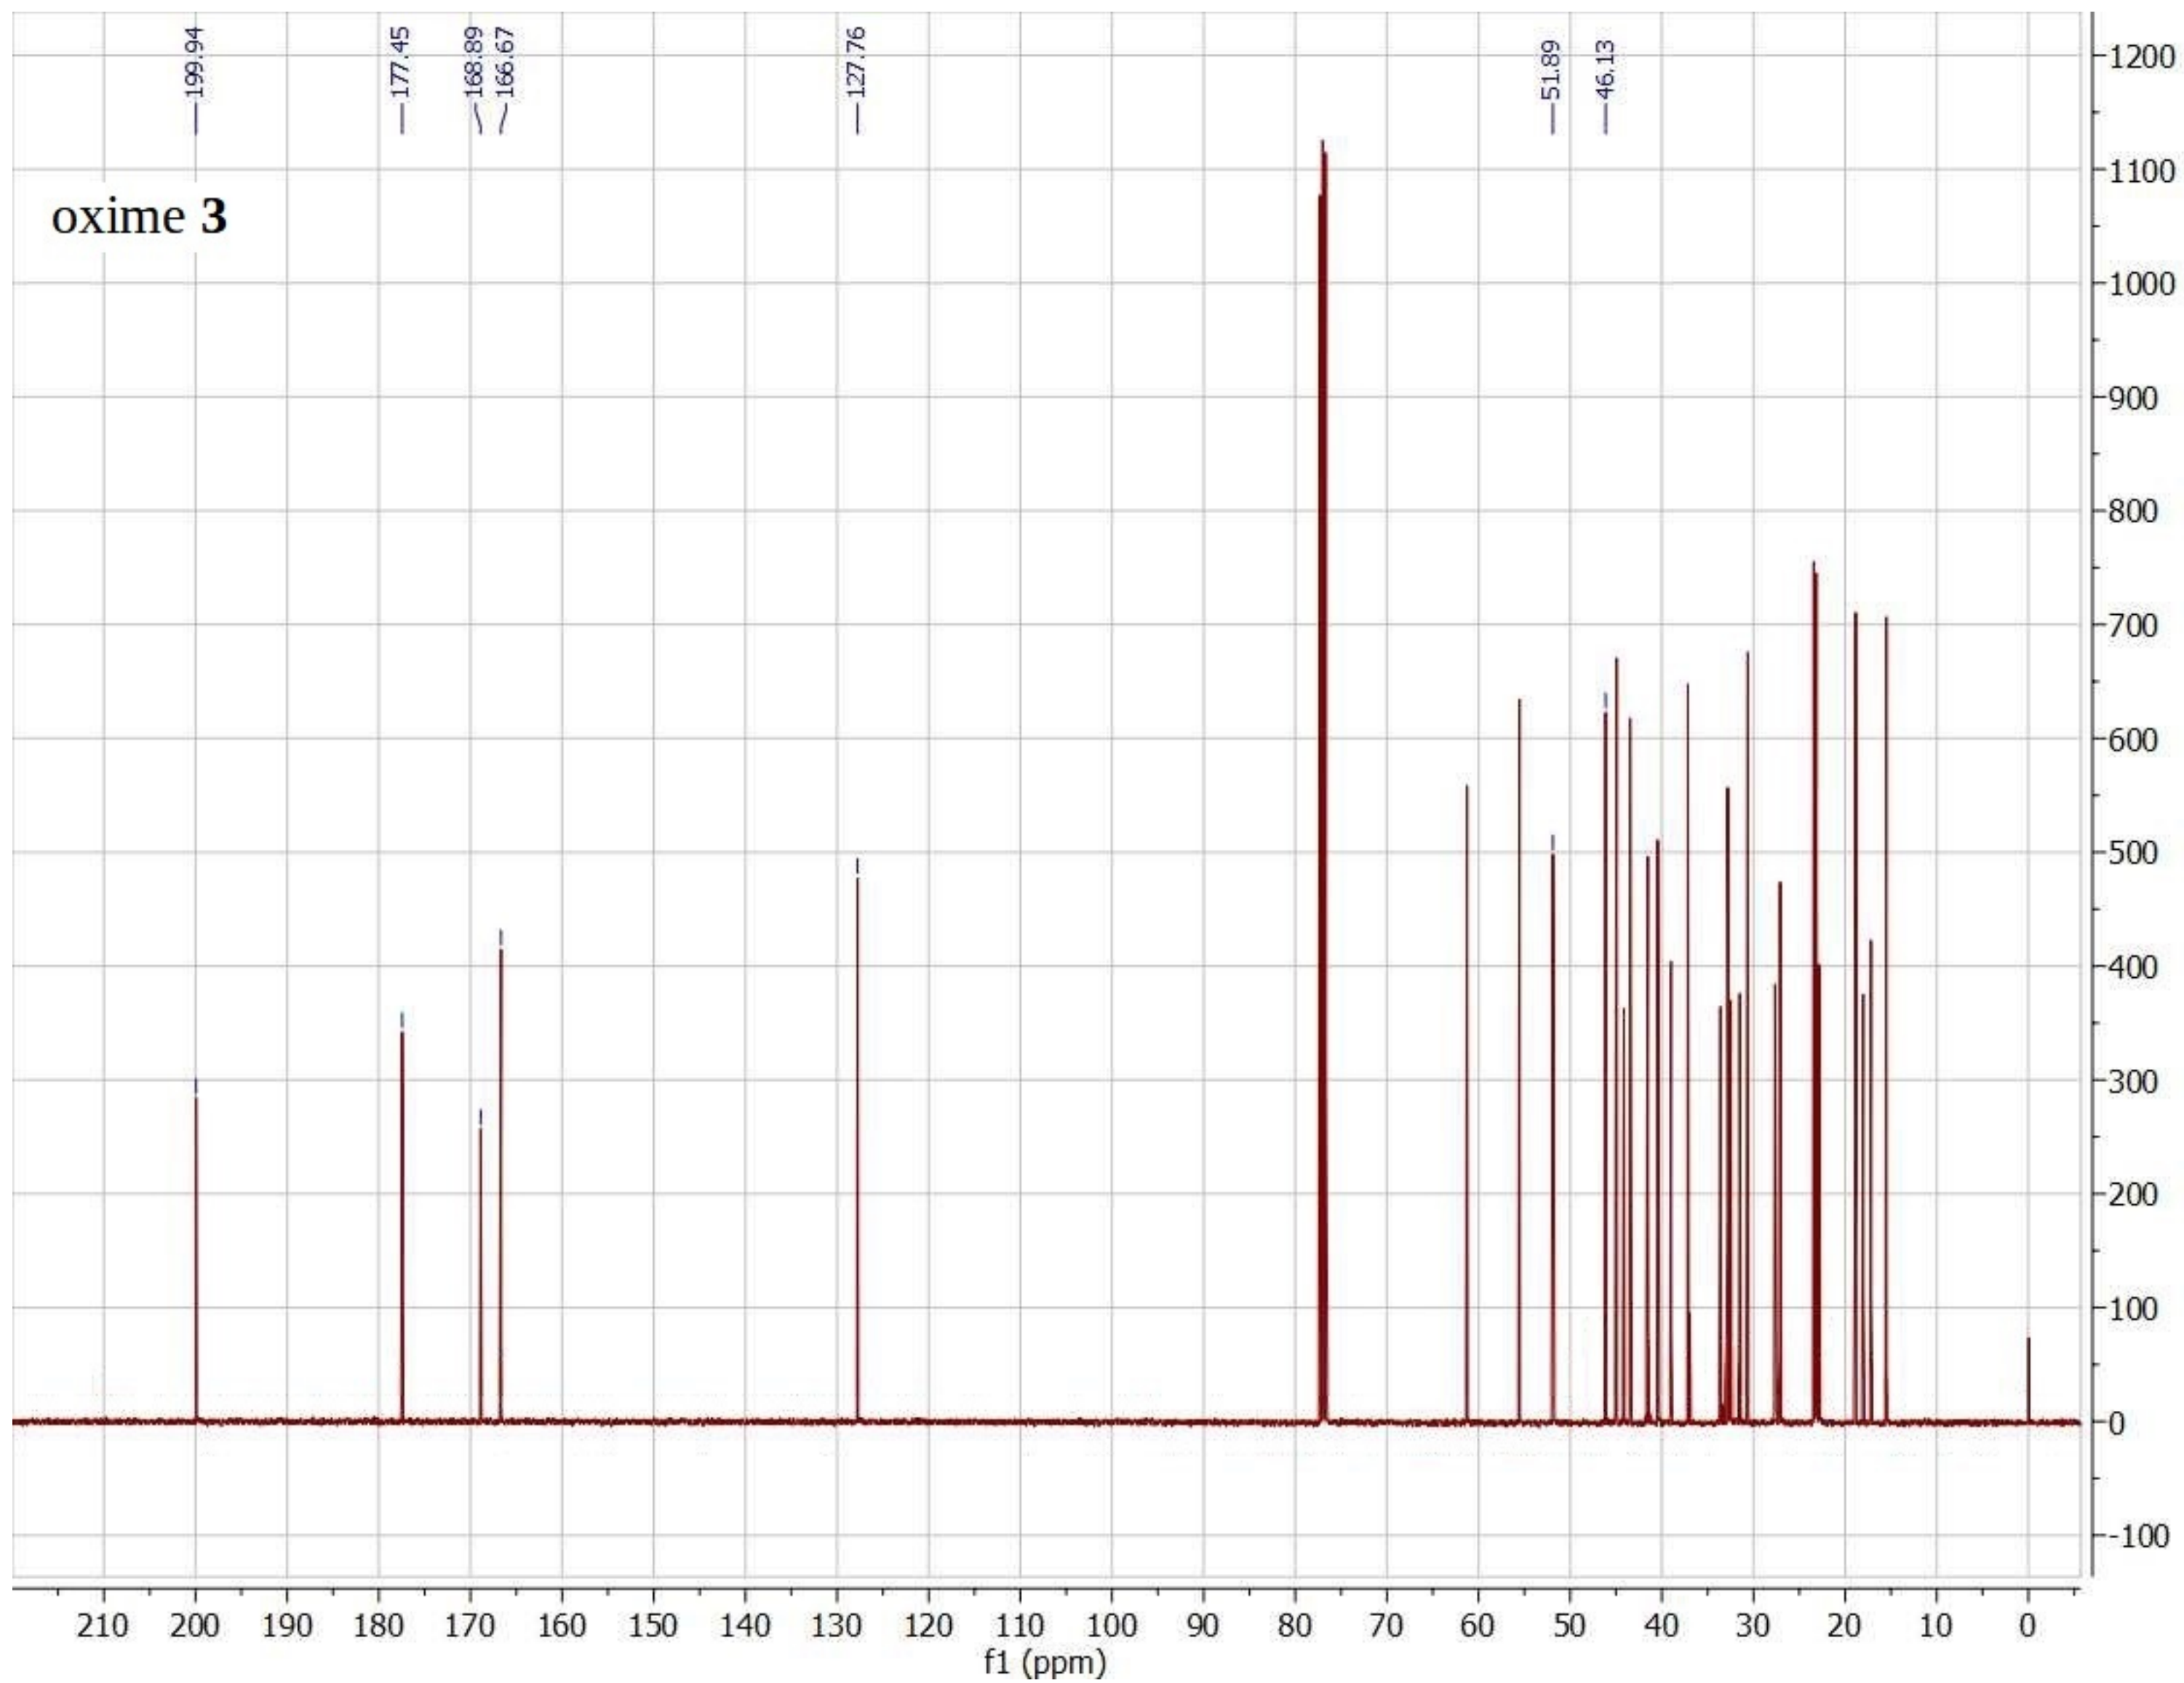



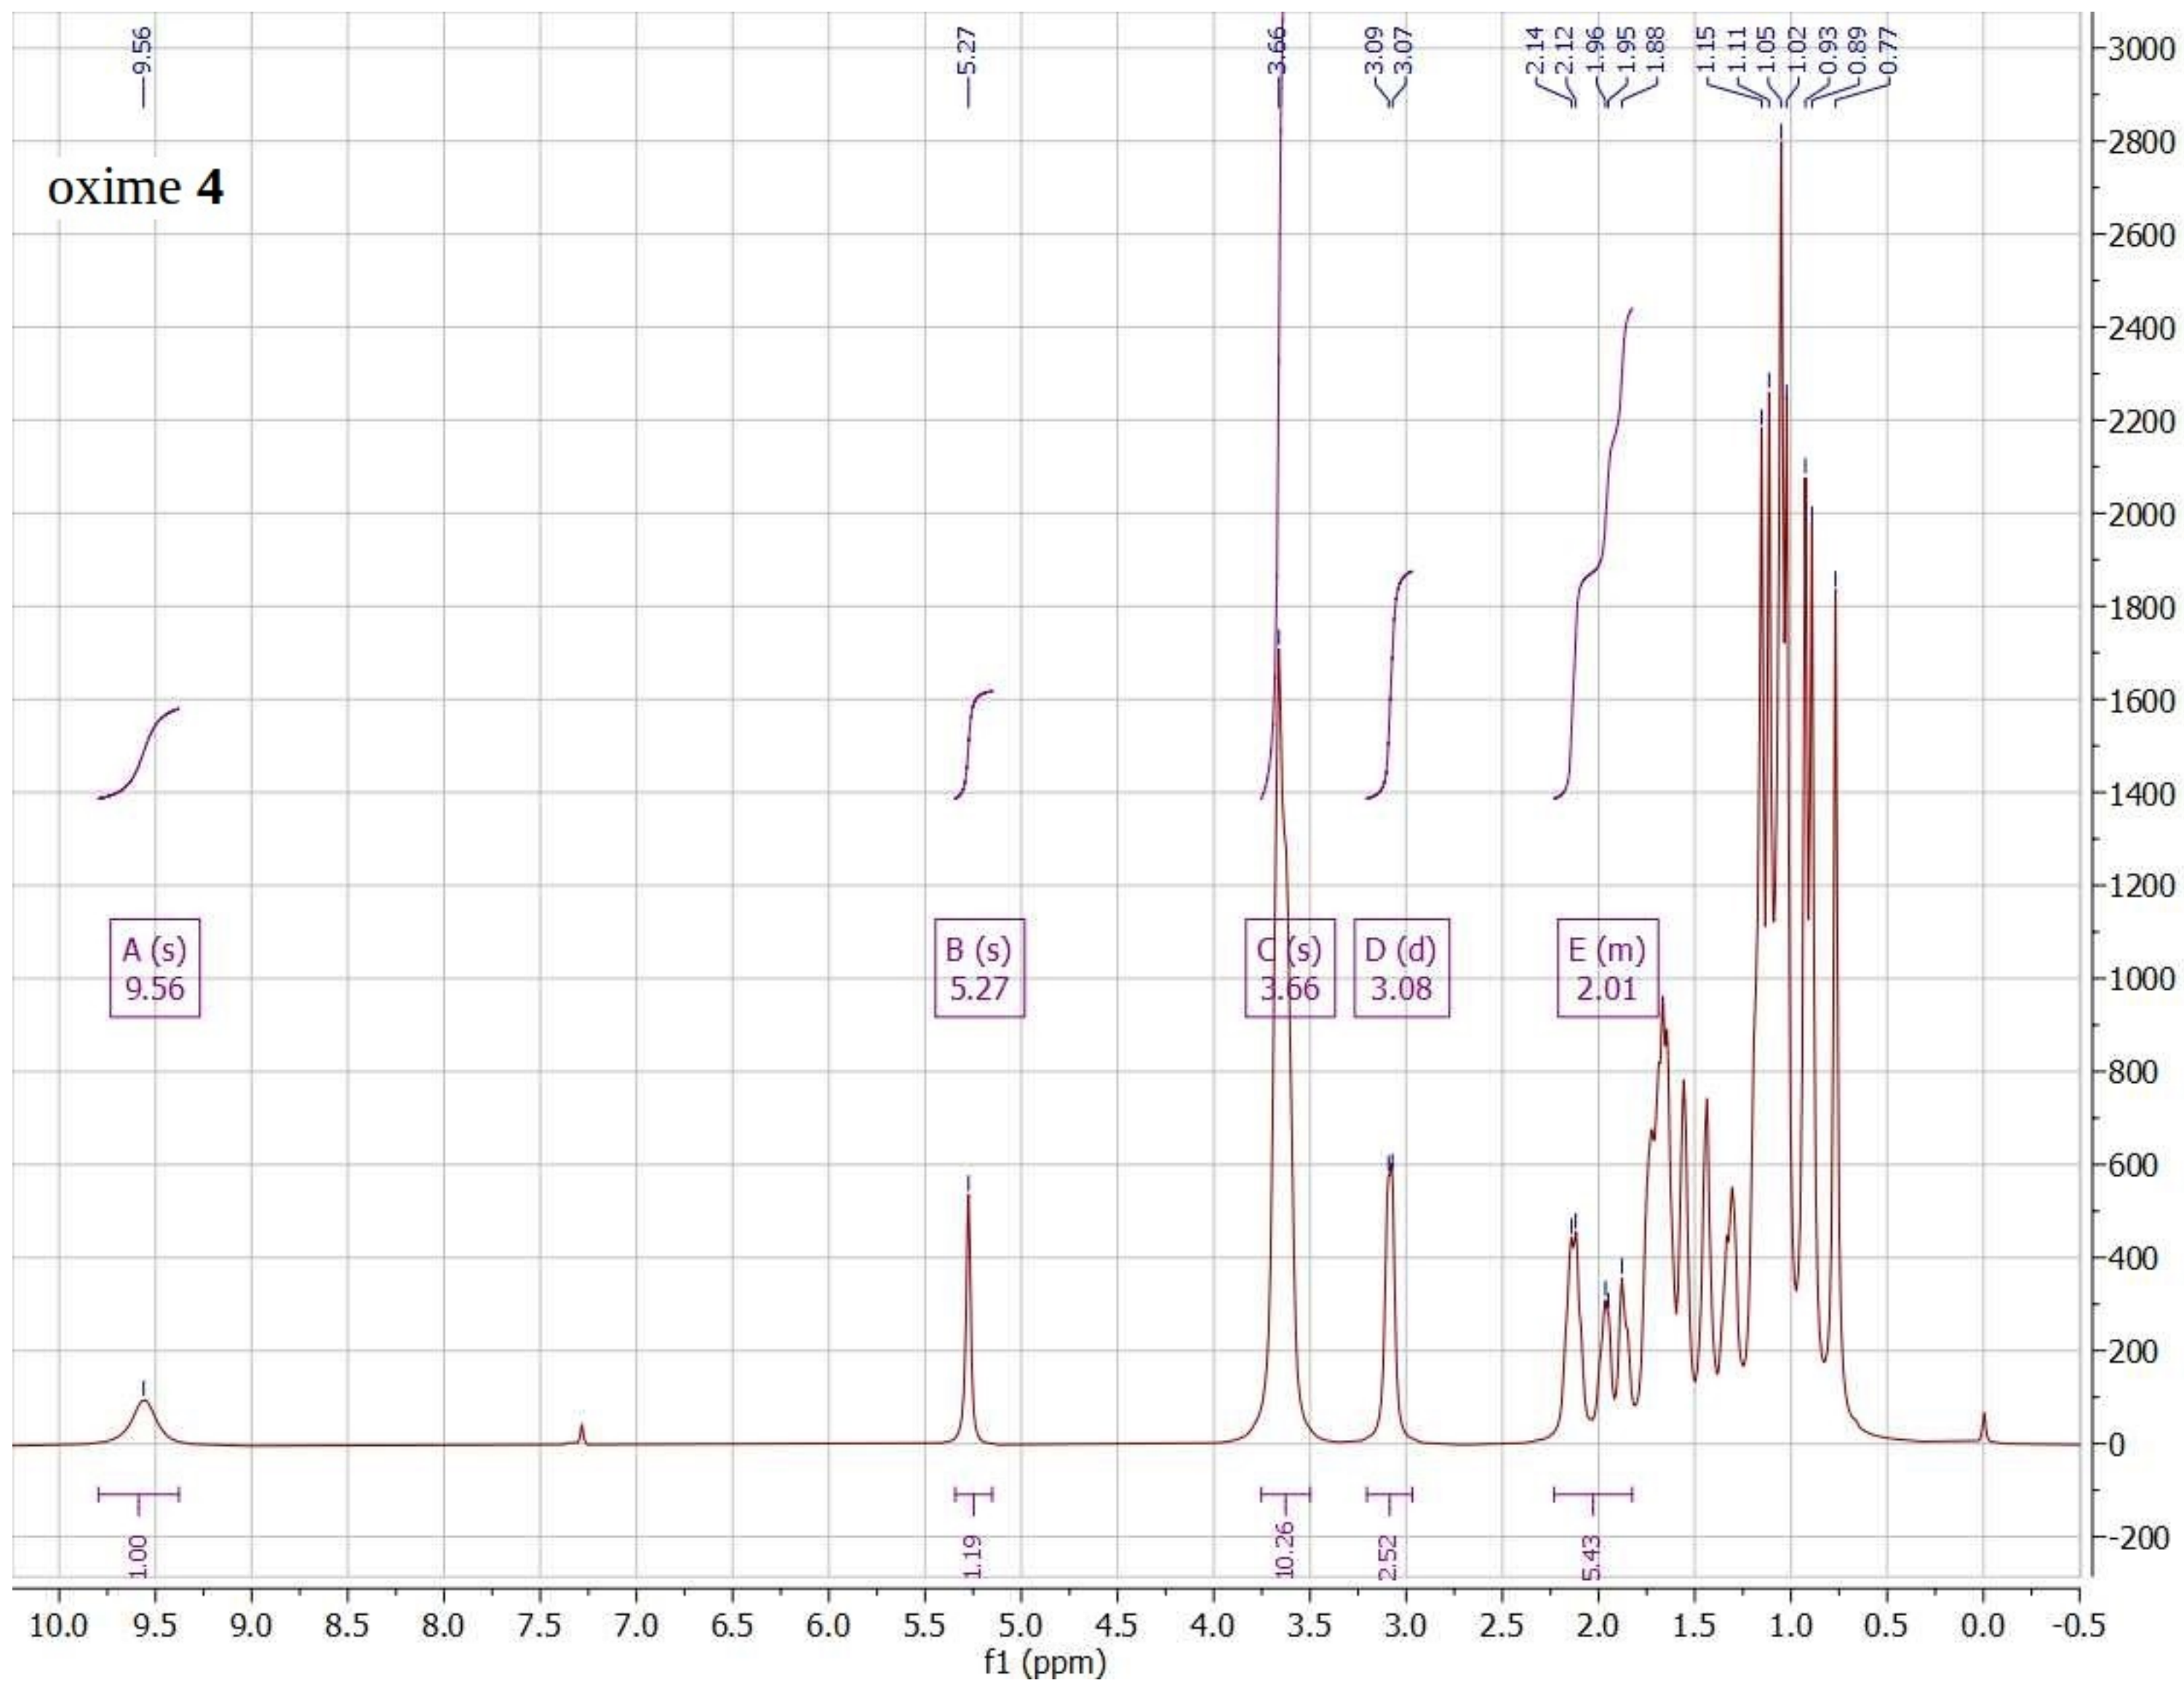

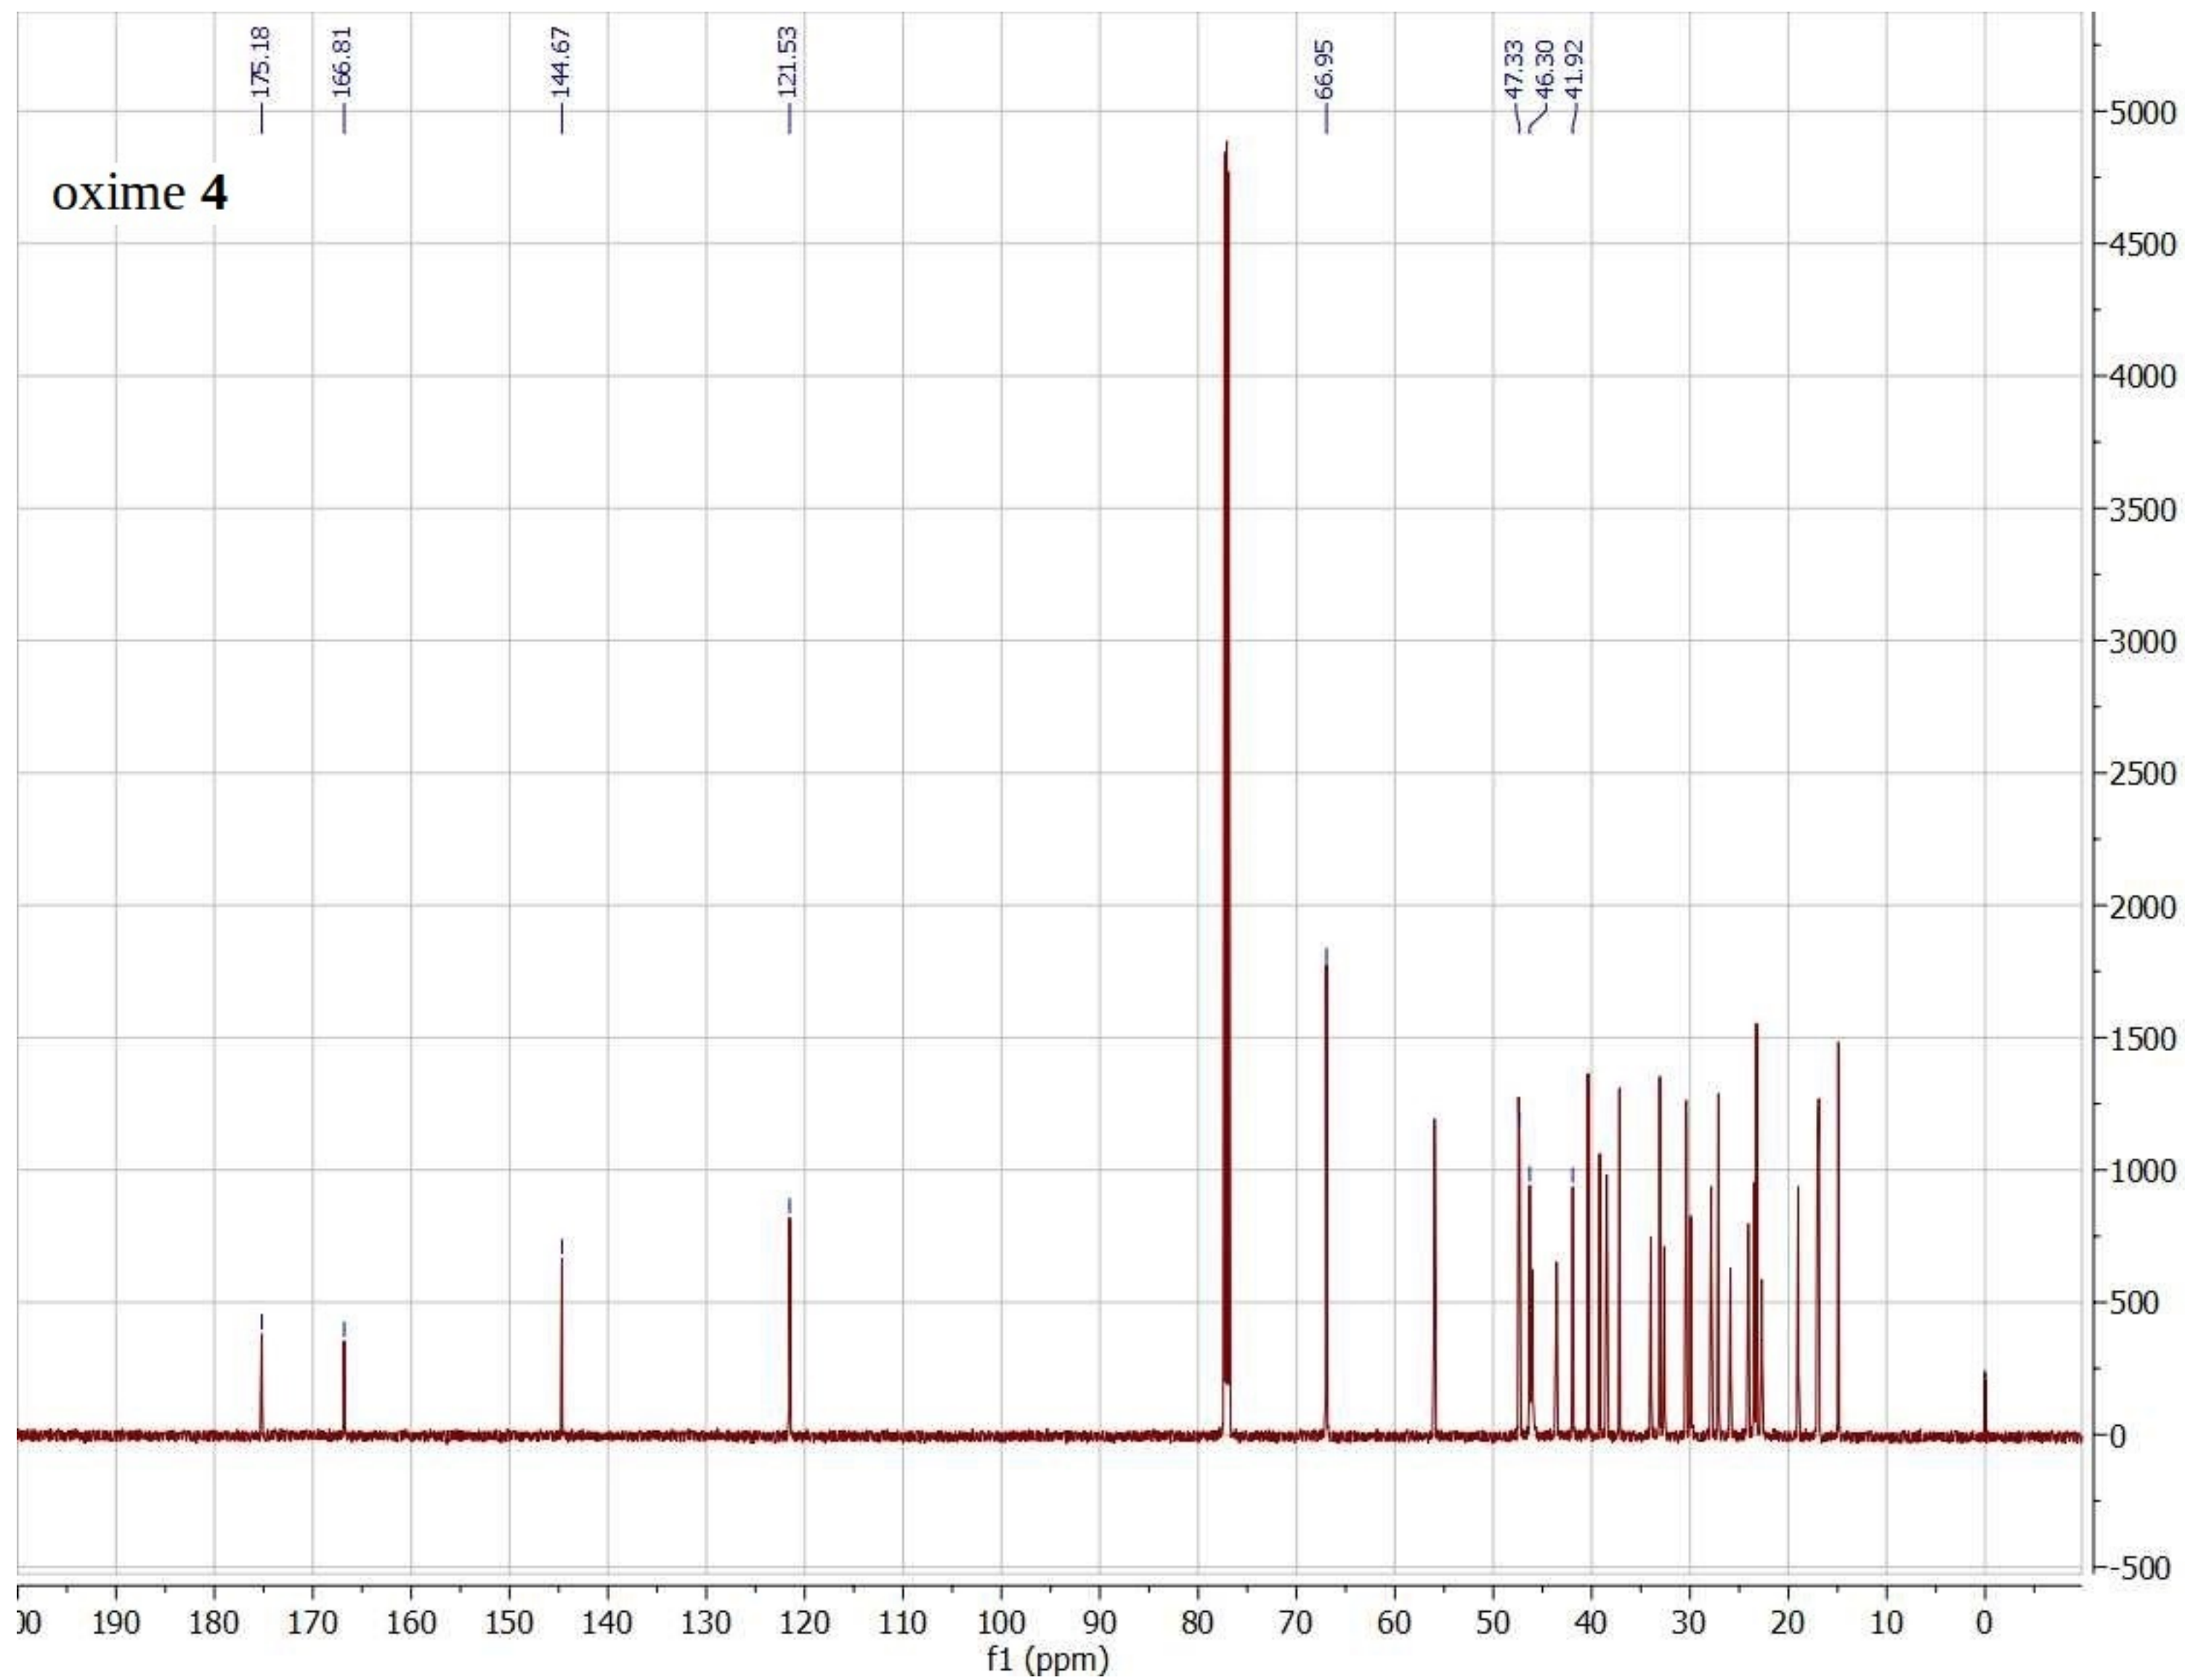

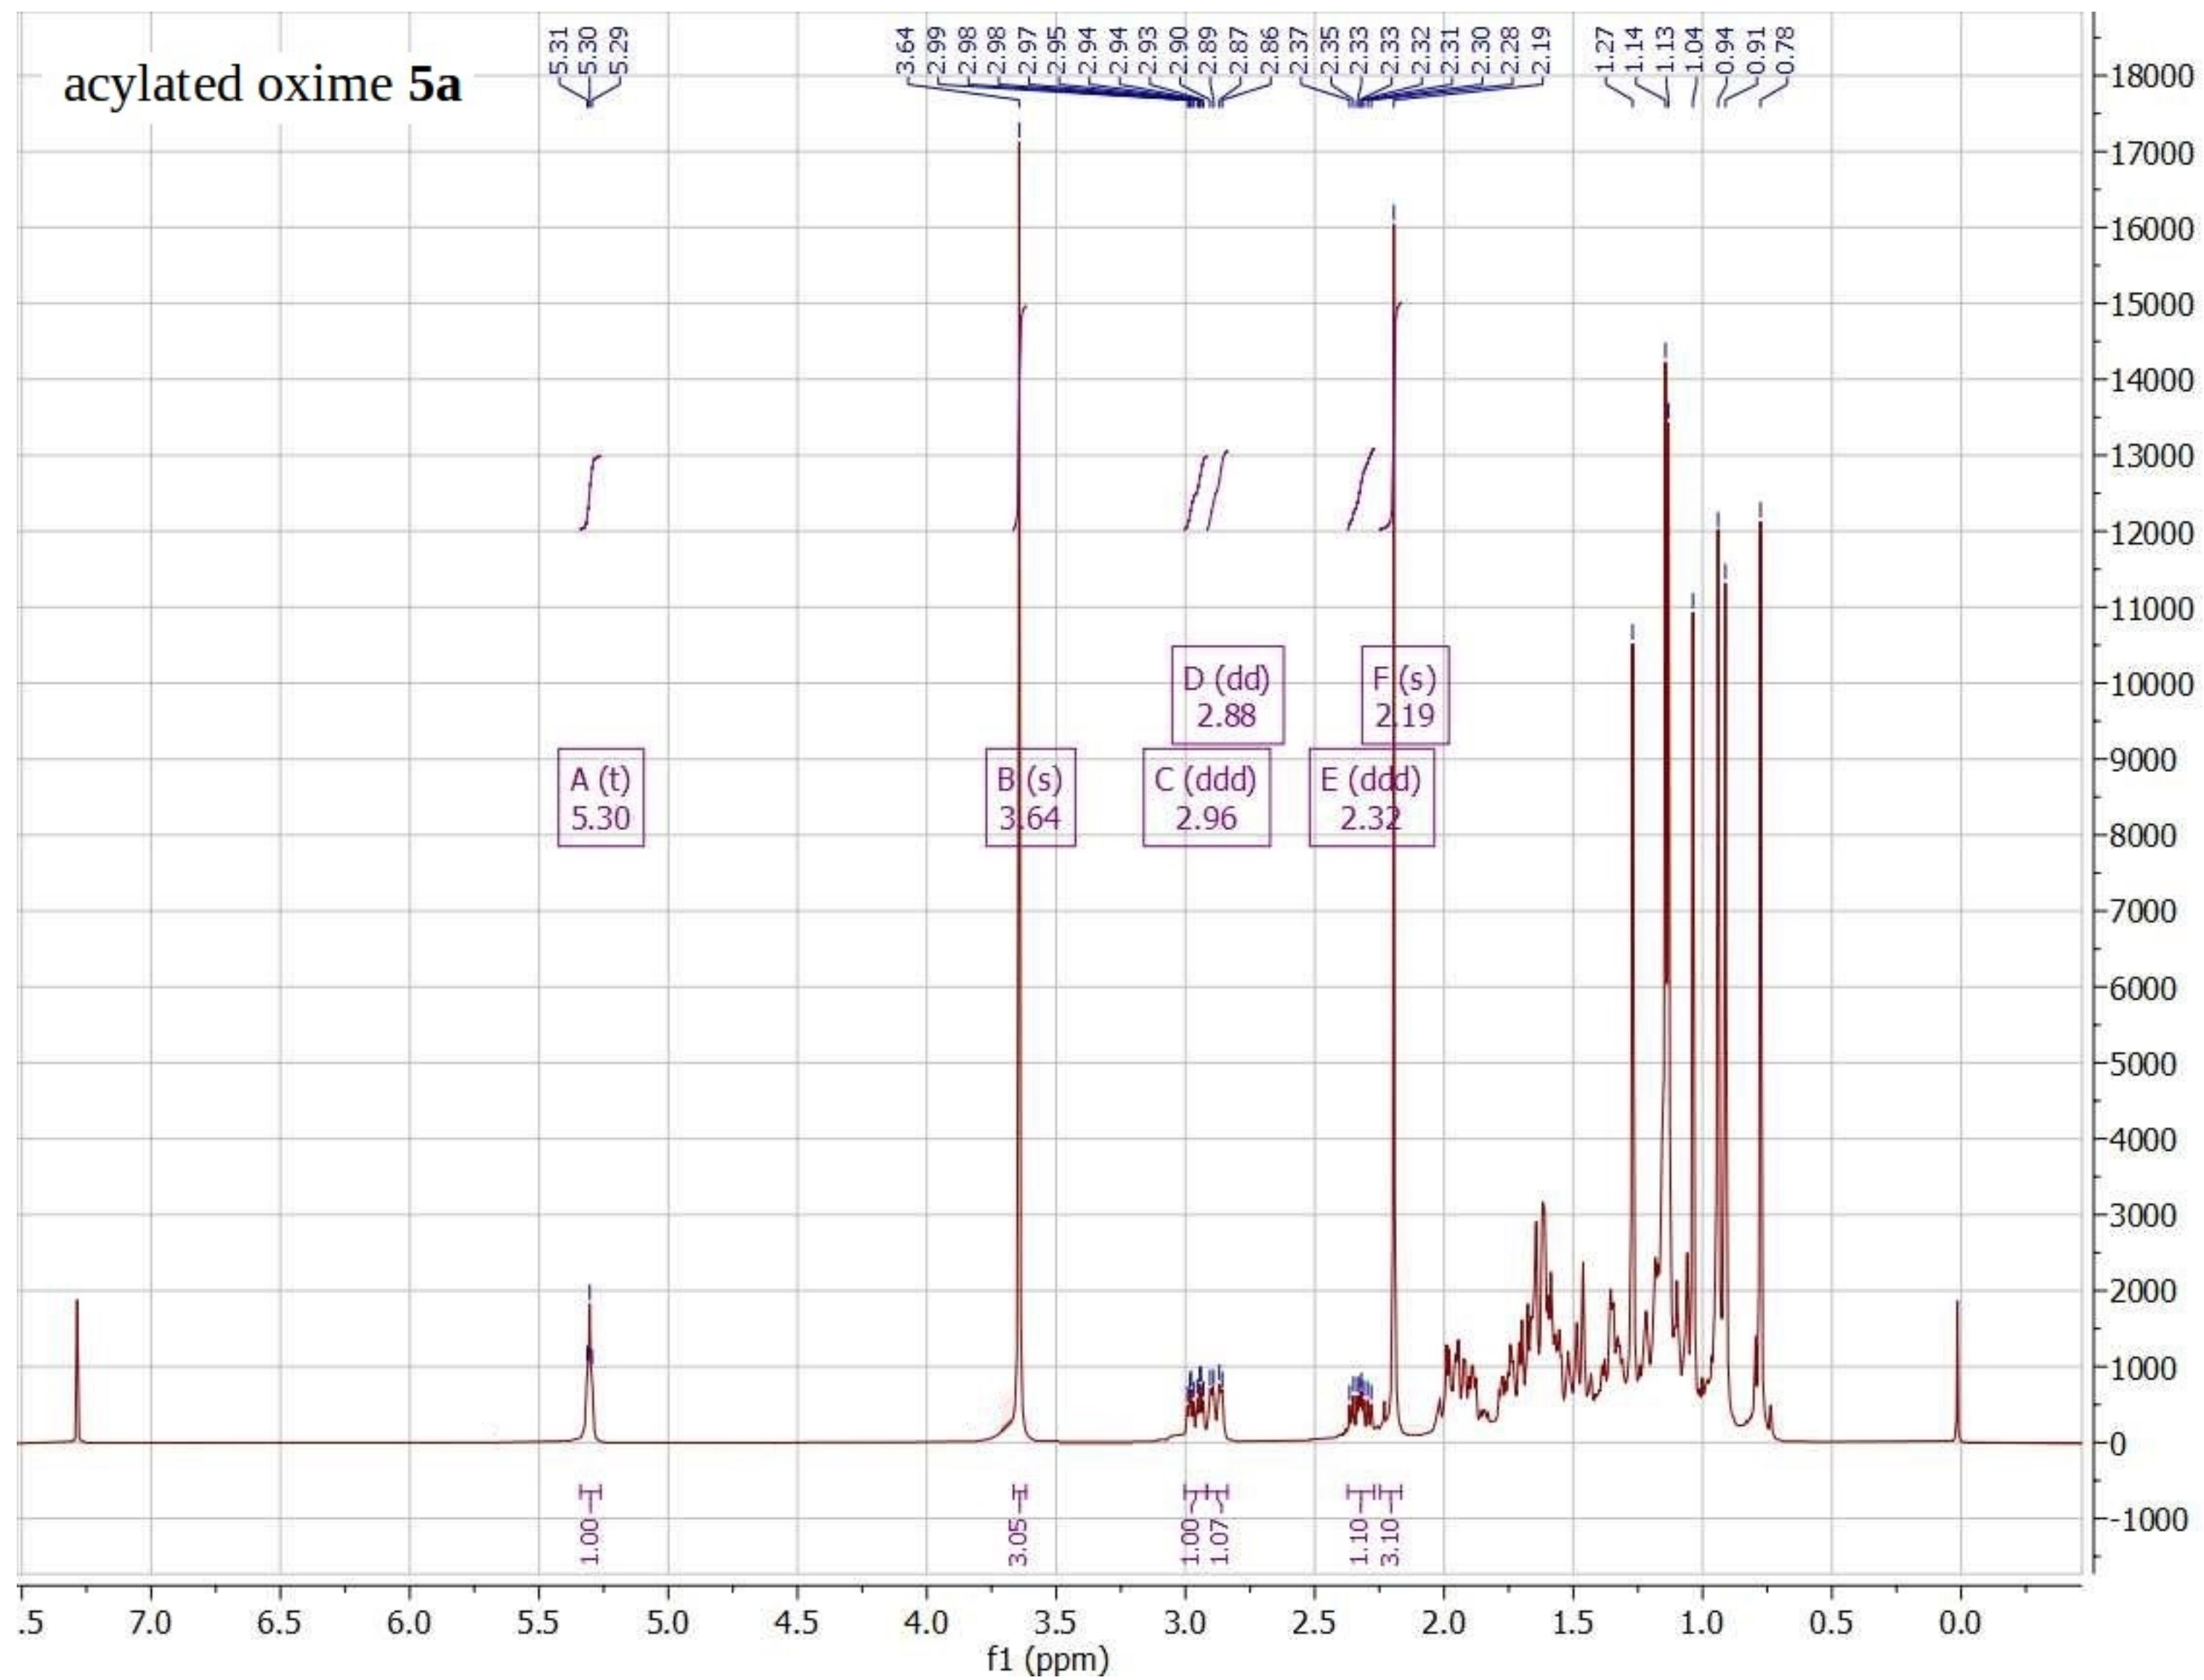



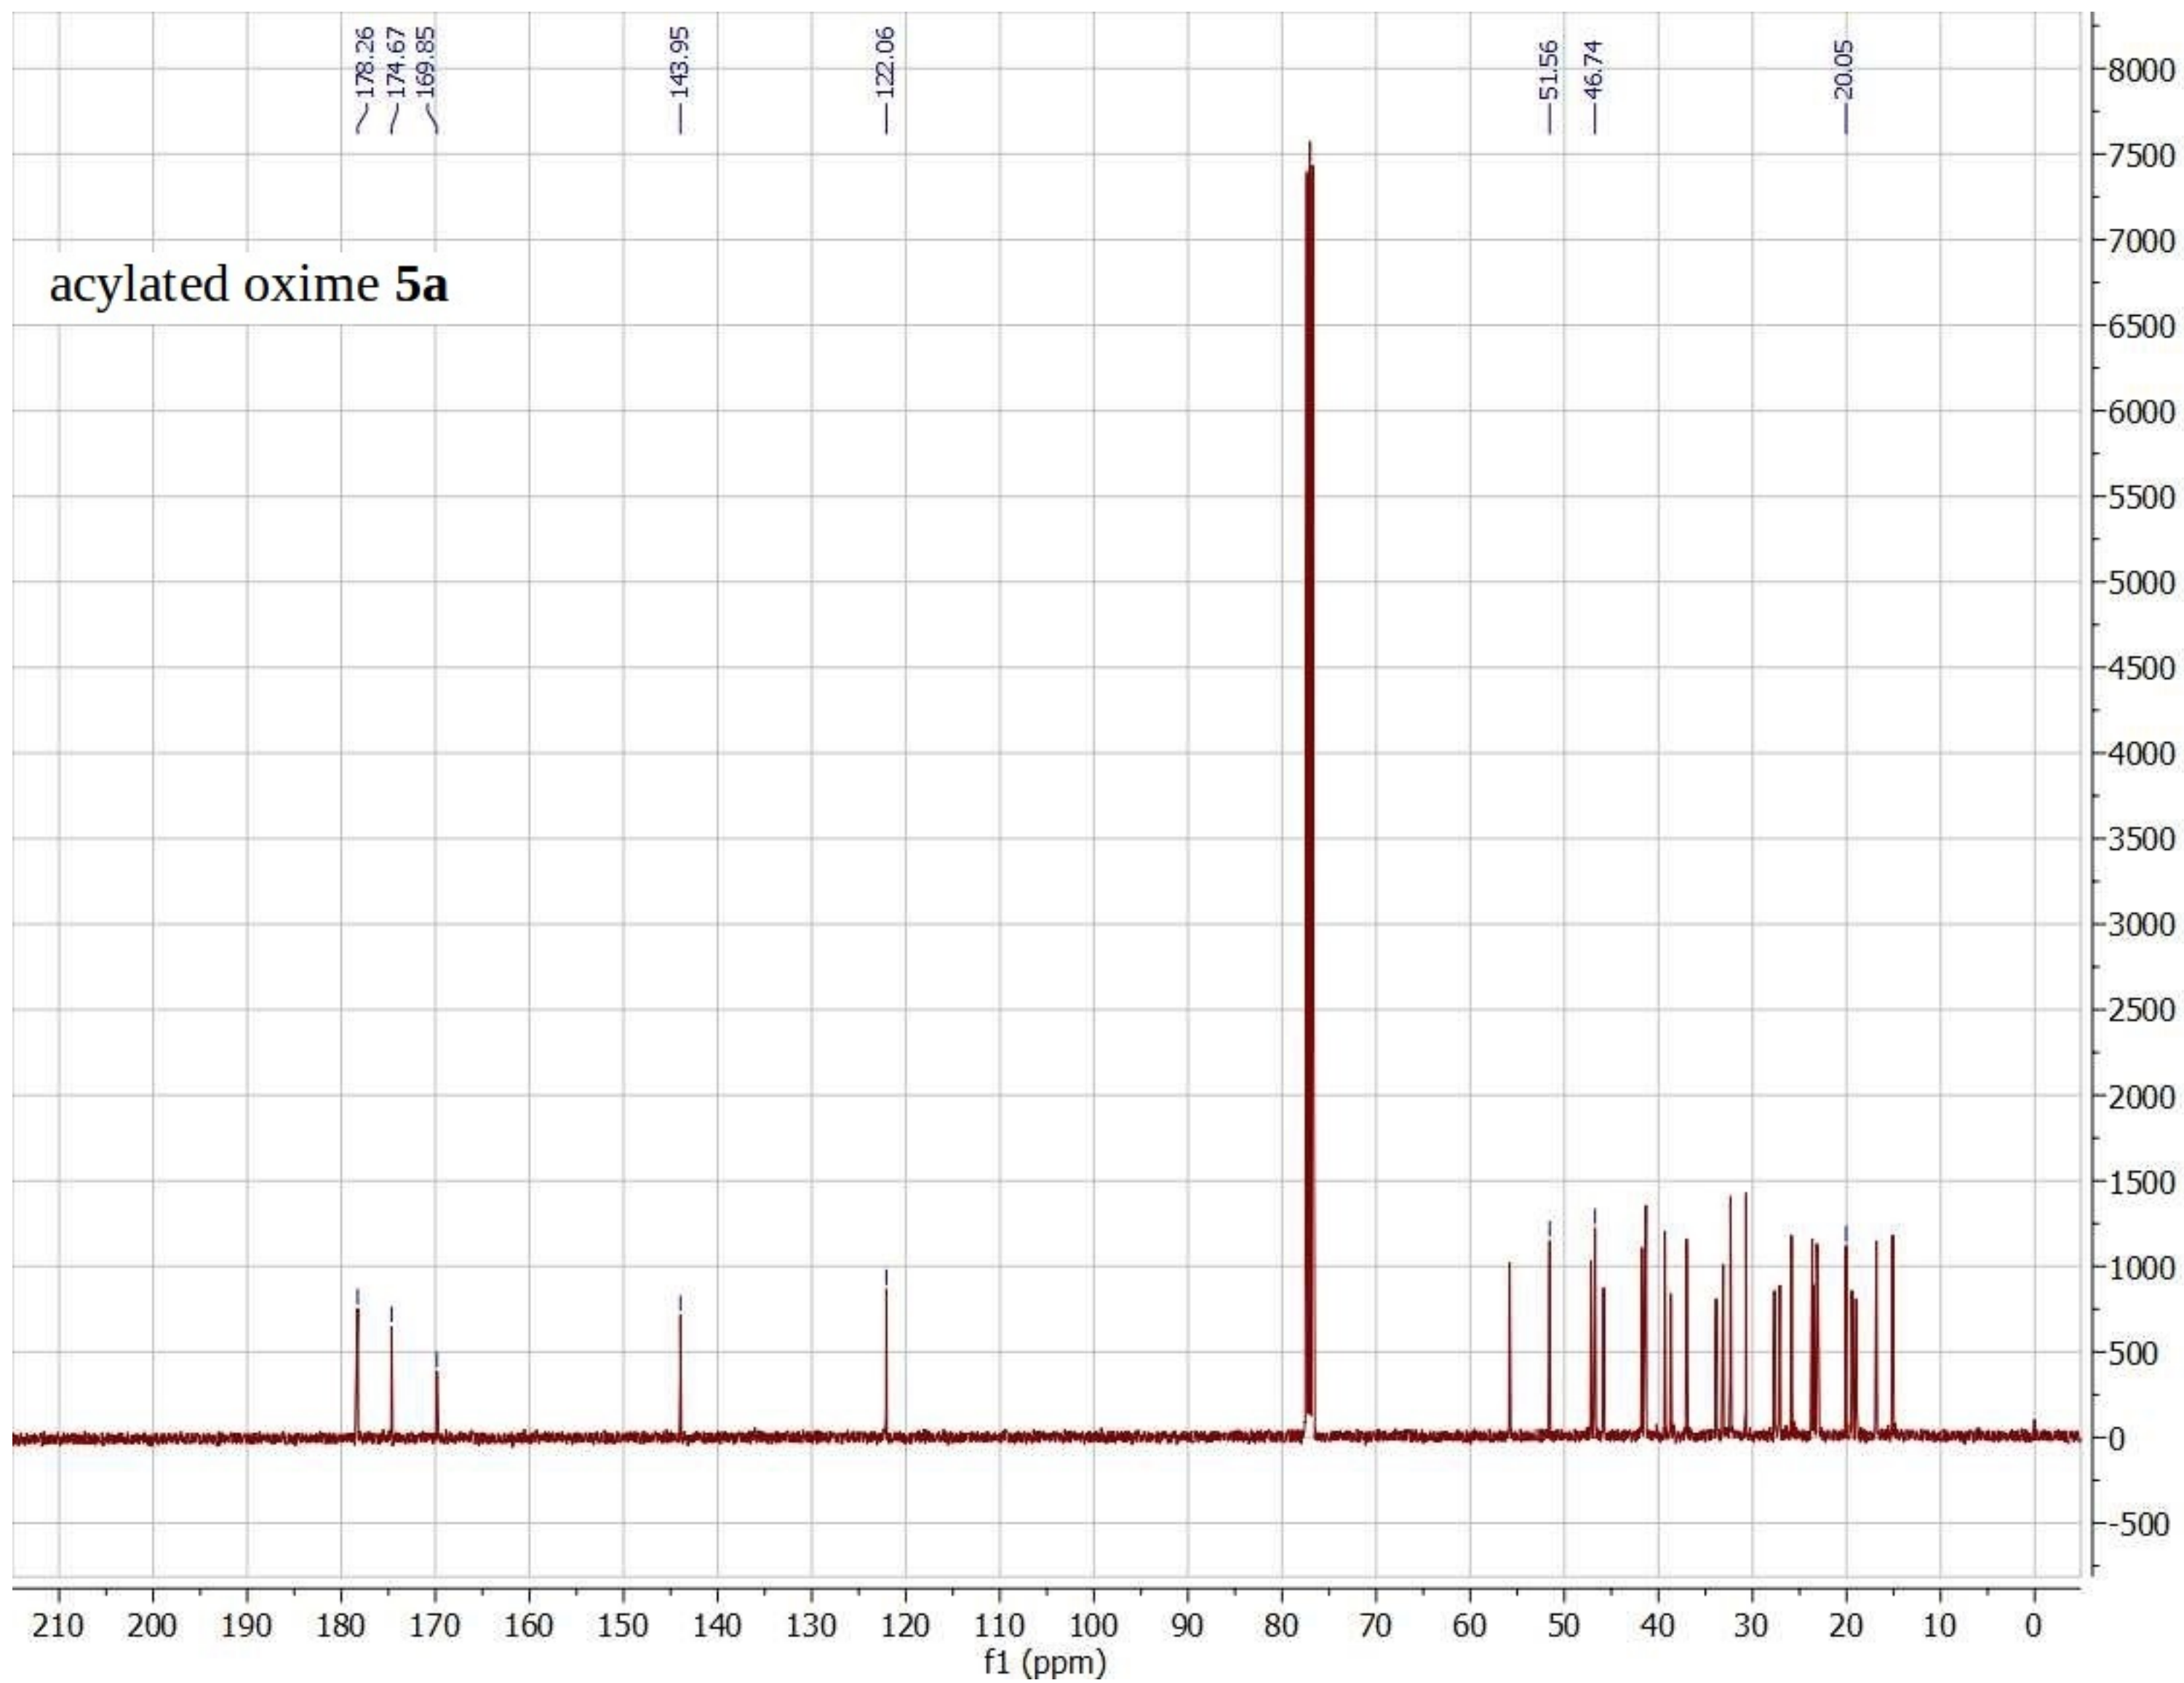

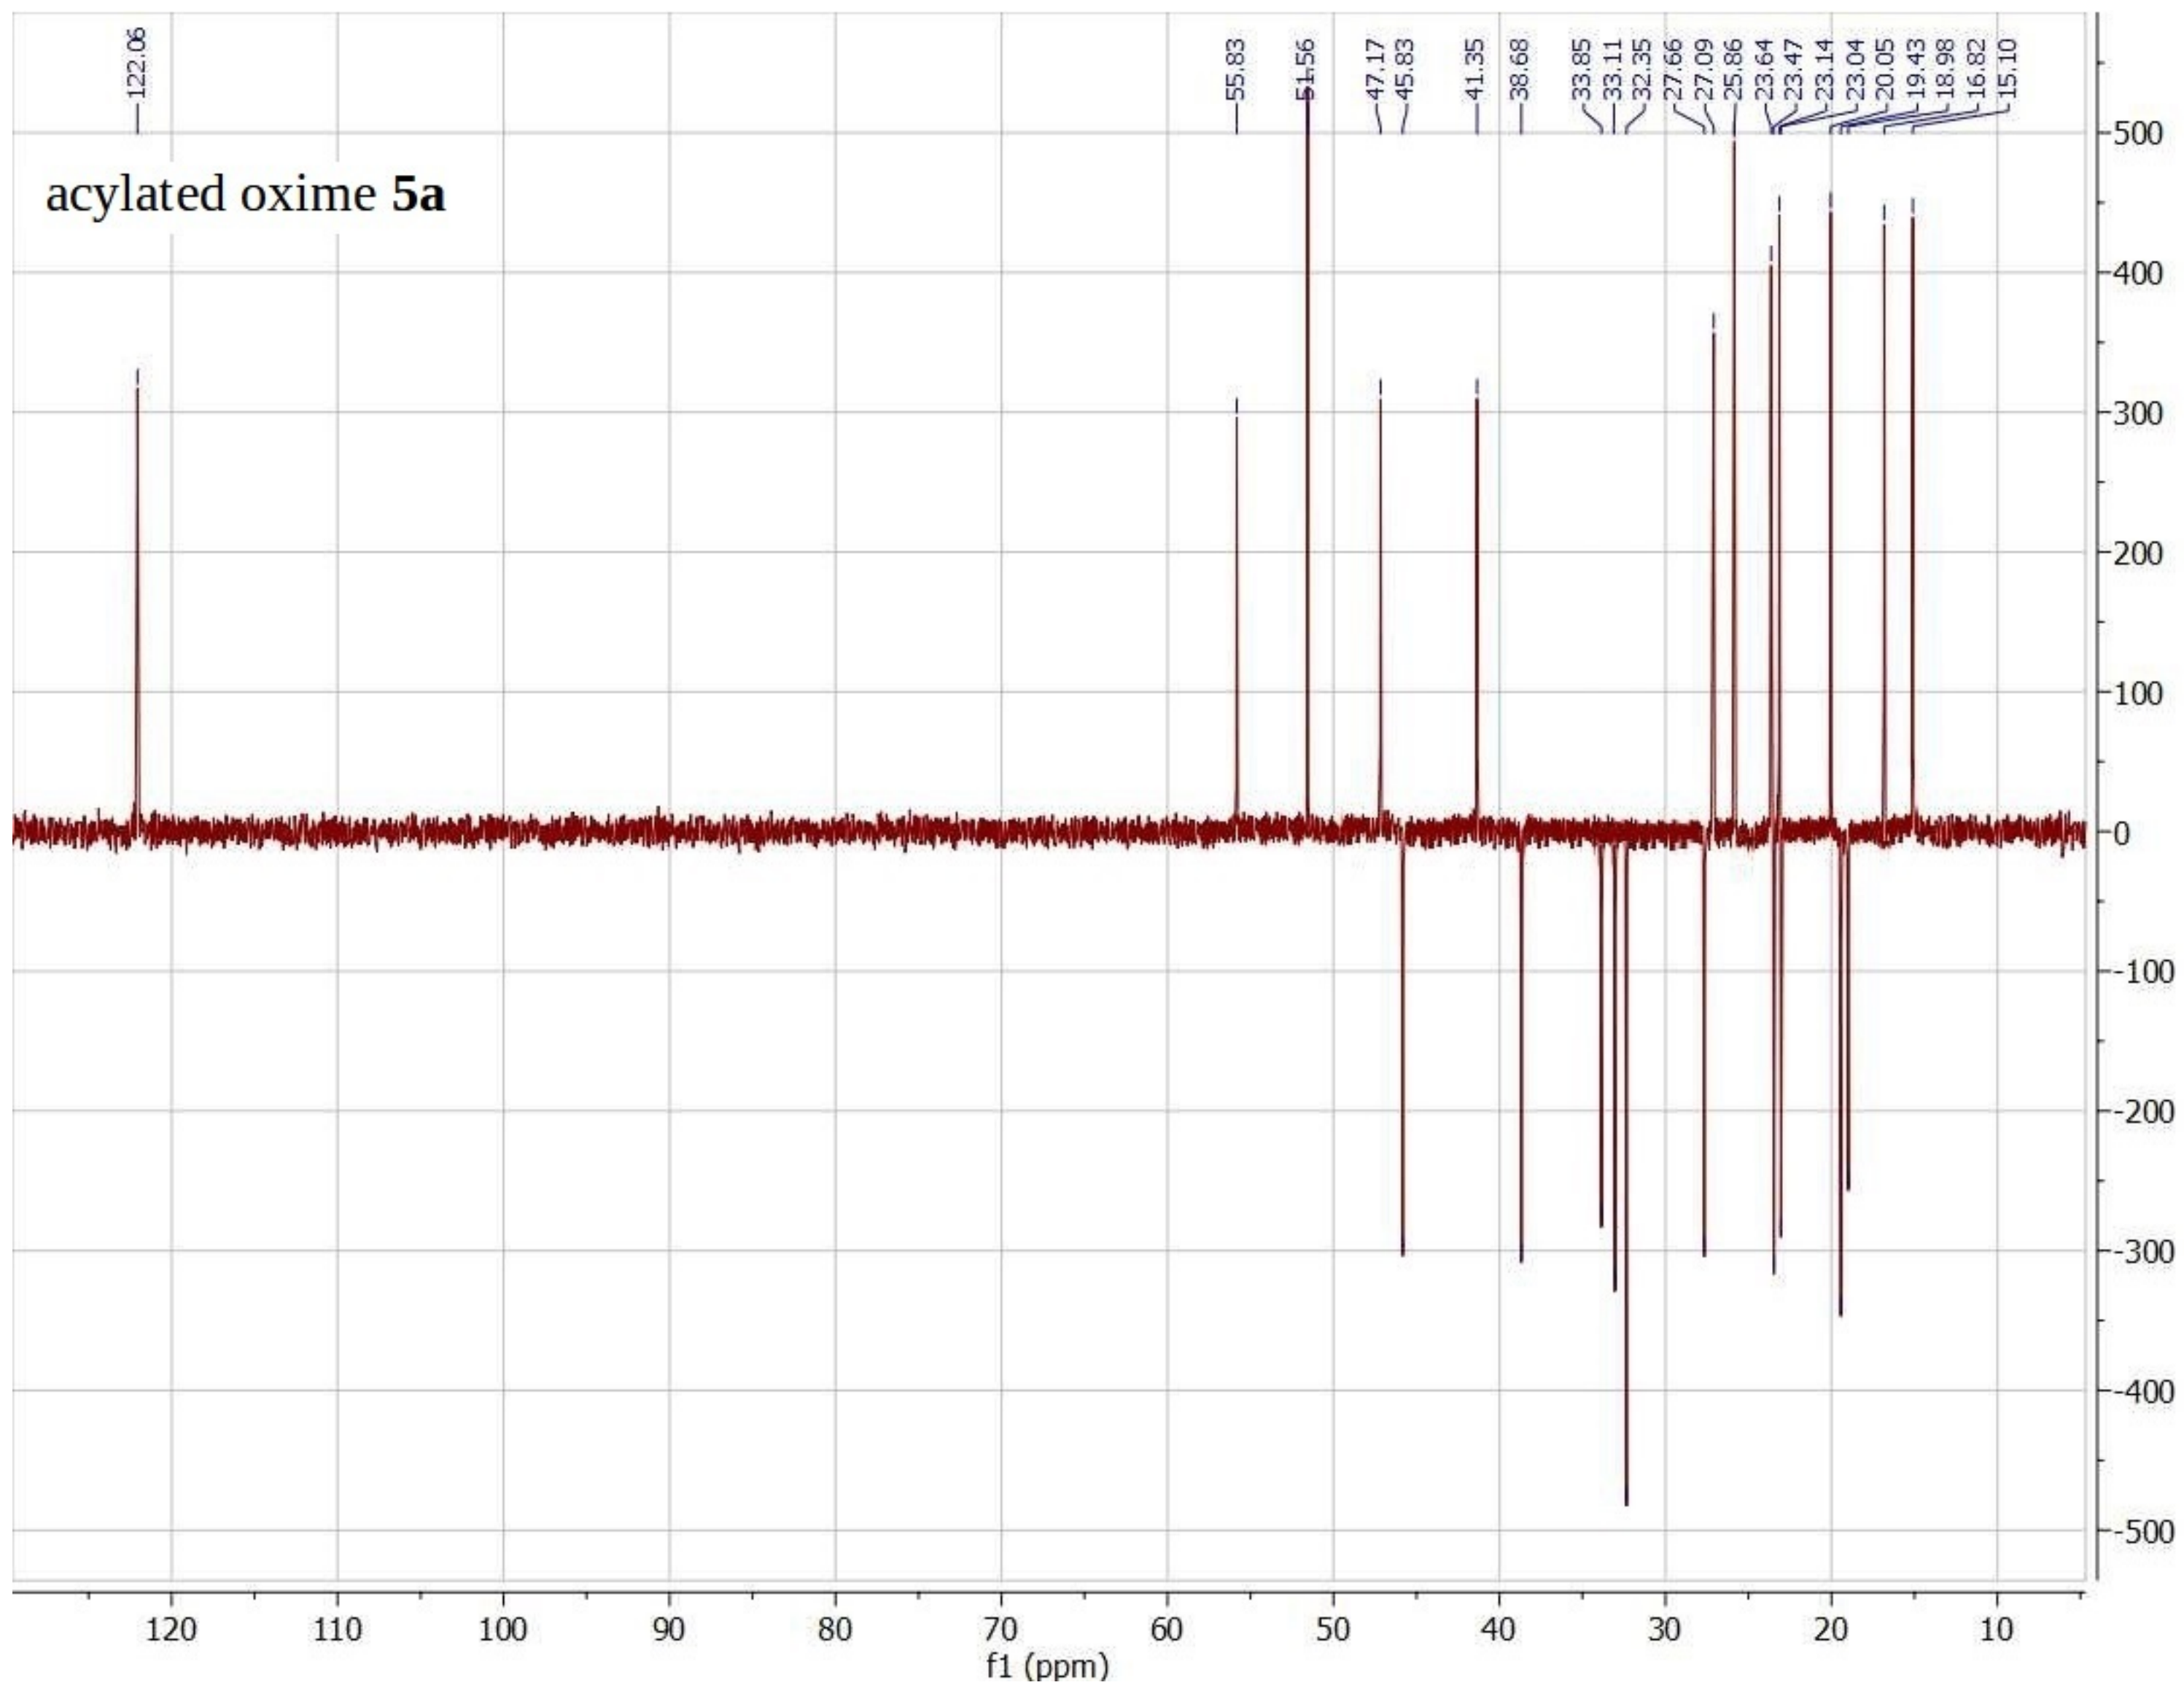

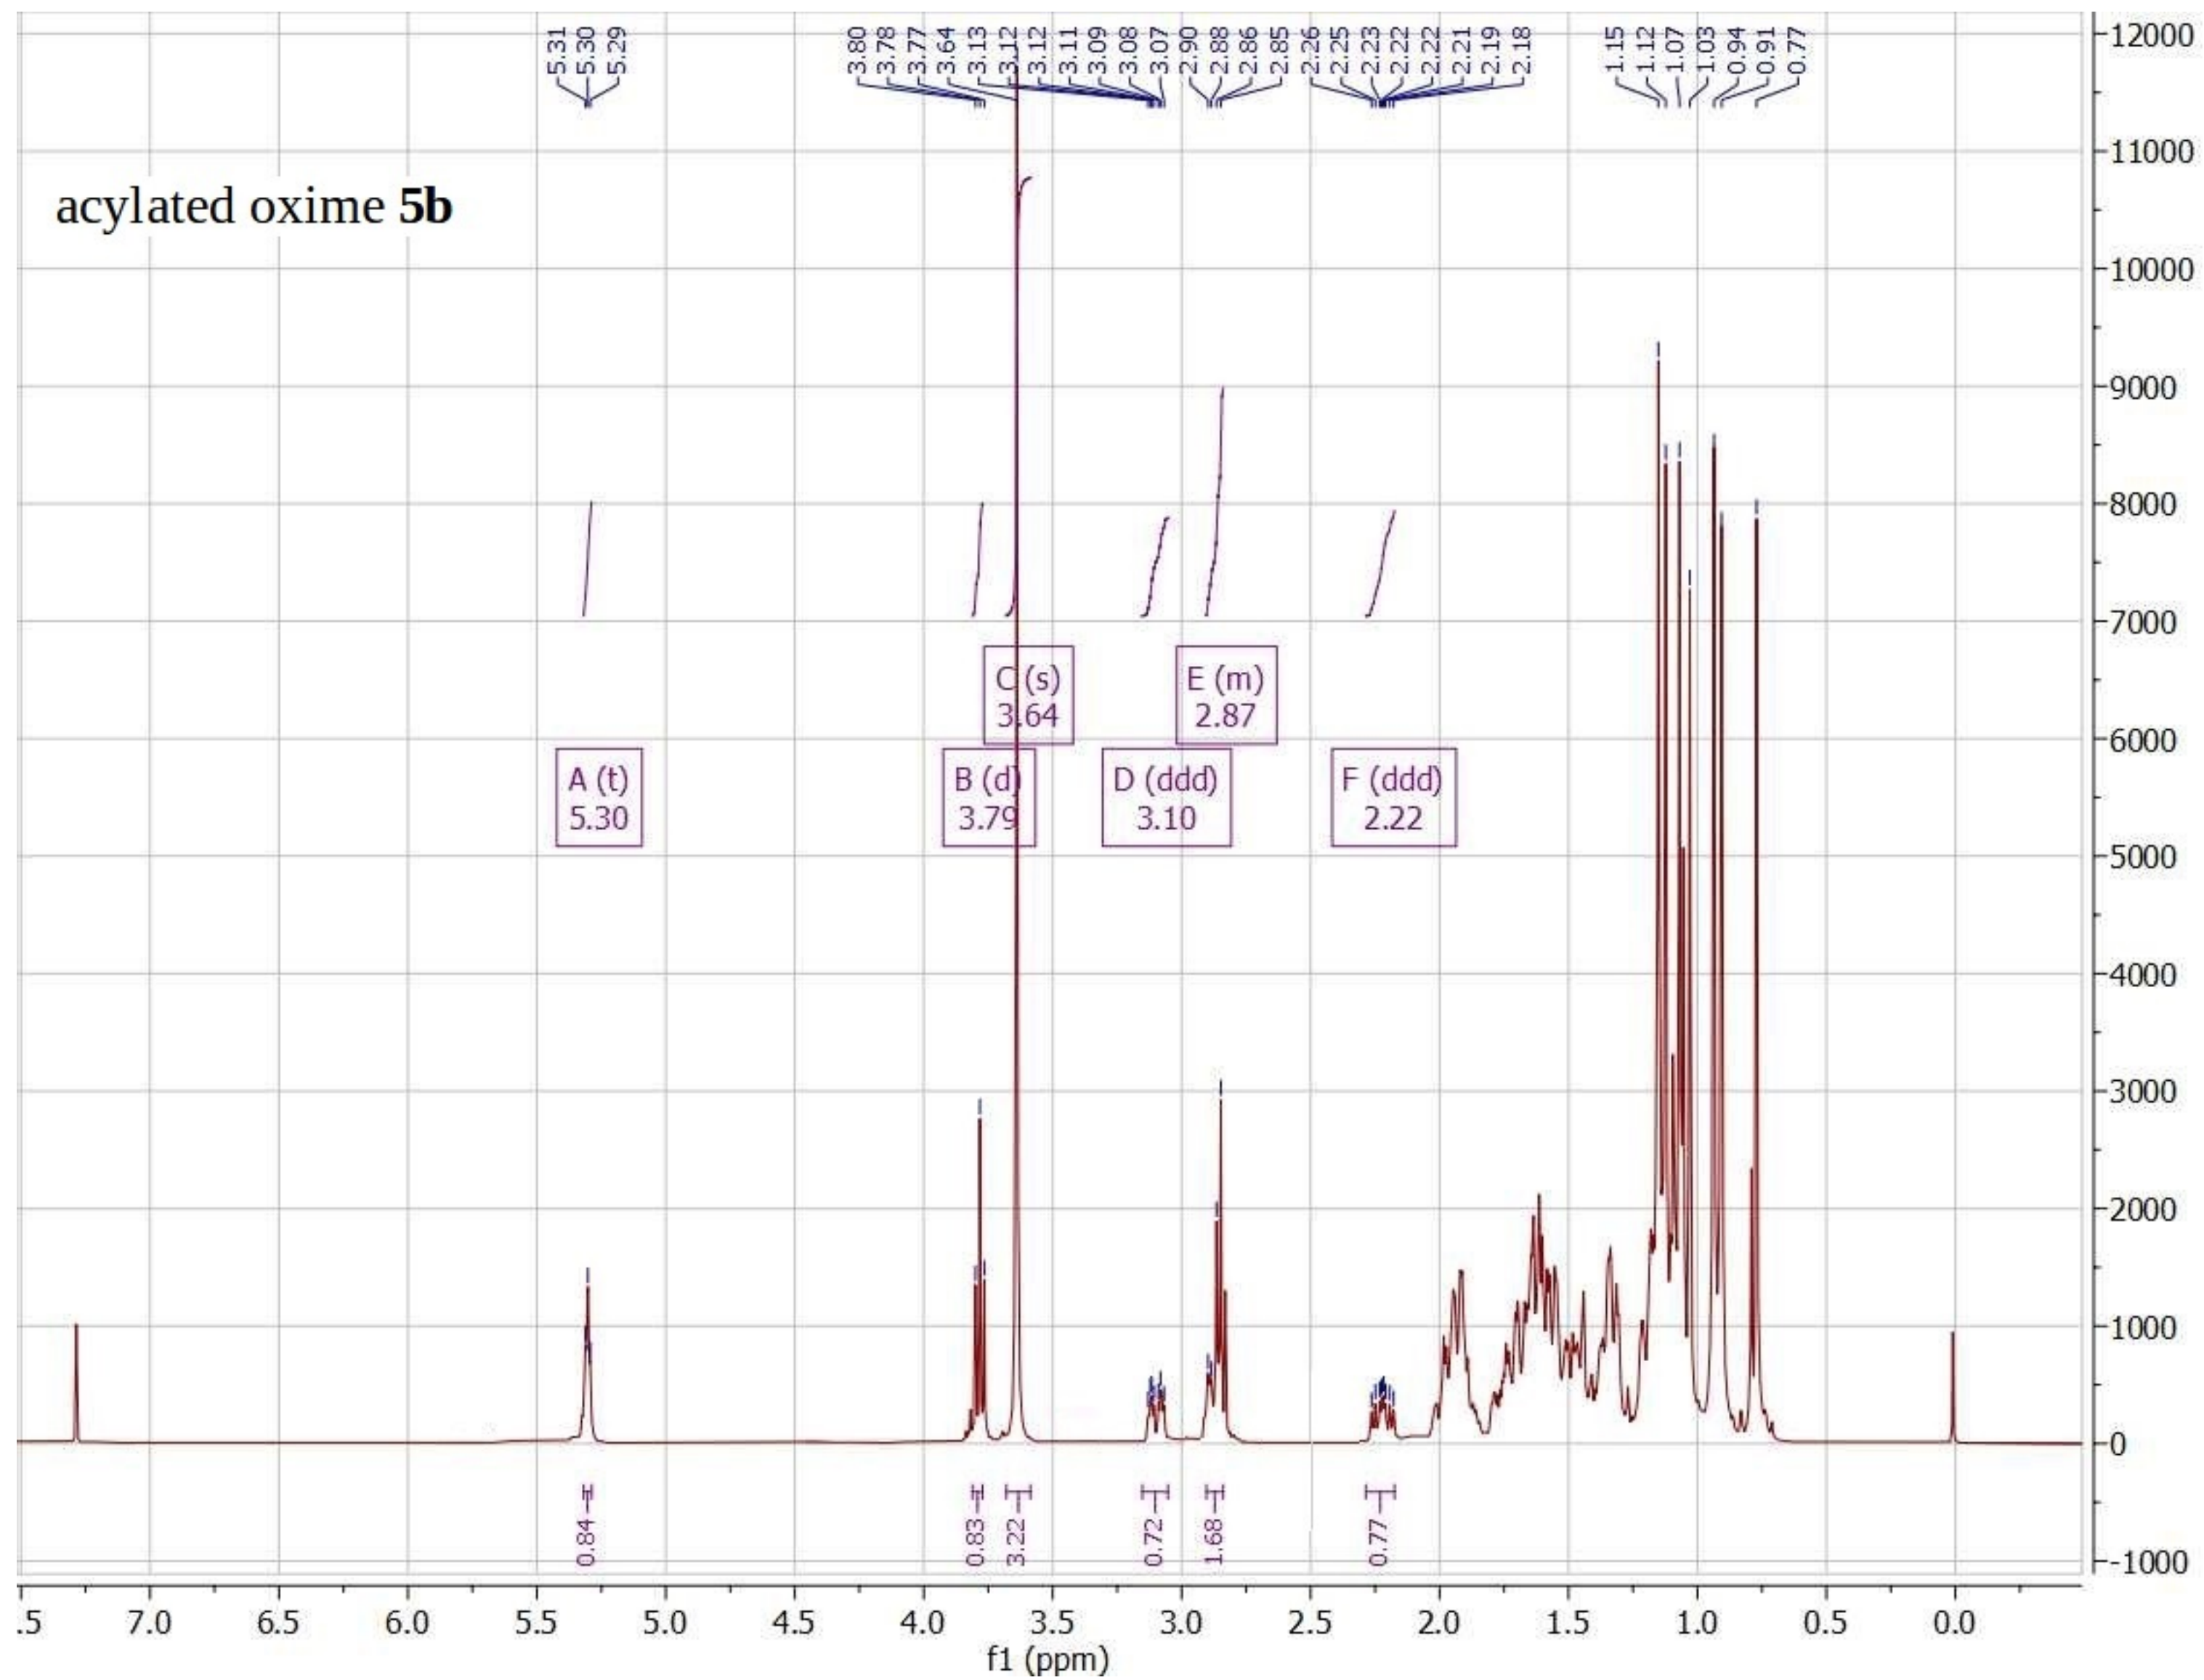



acylated oxime **5b**

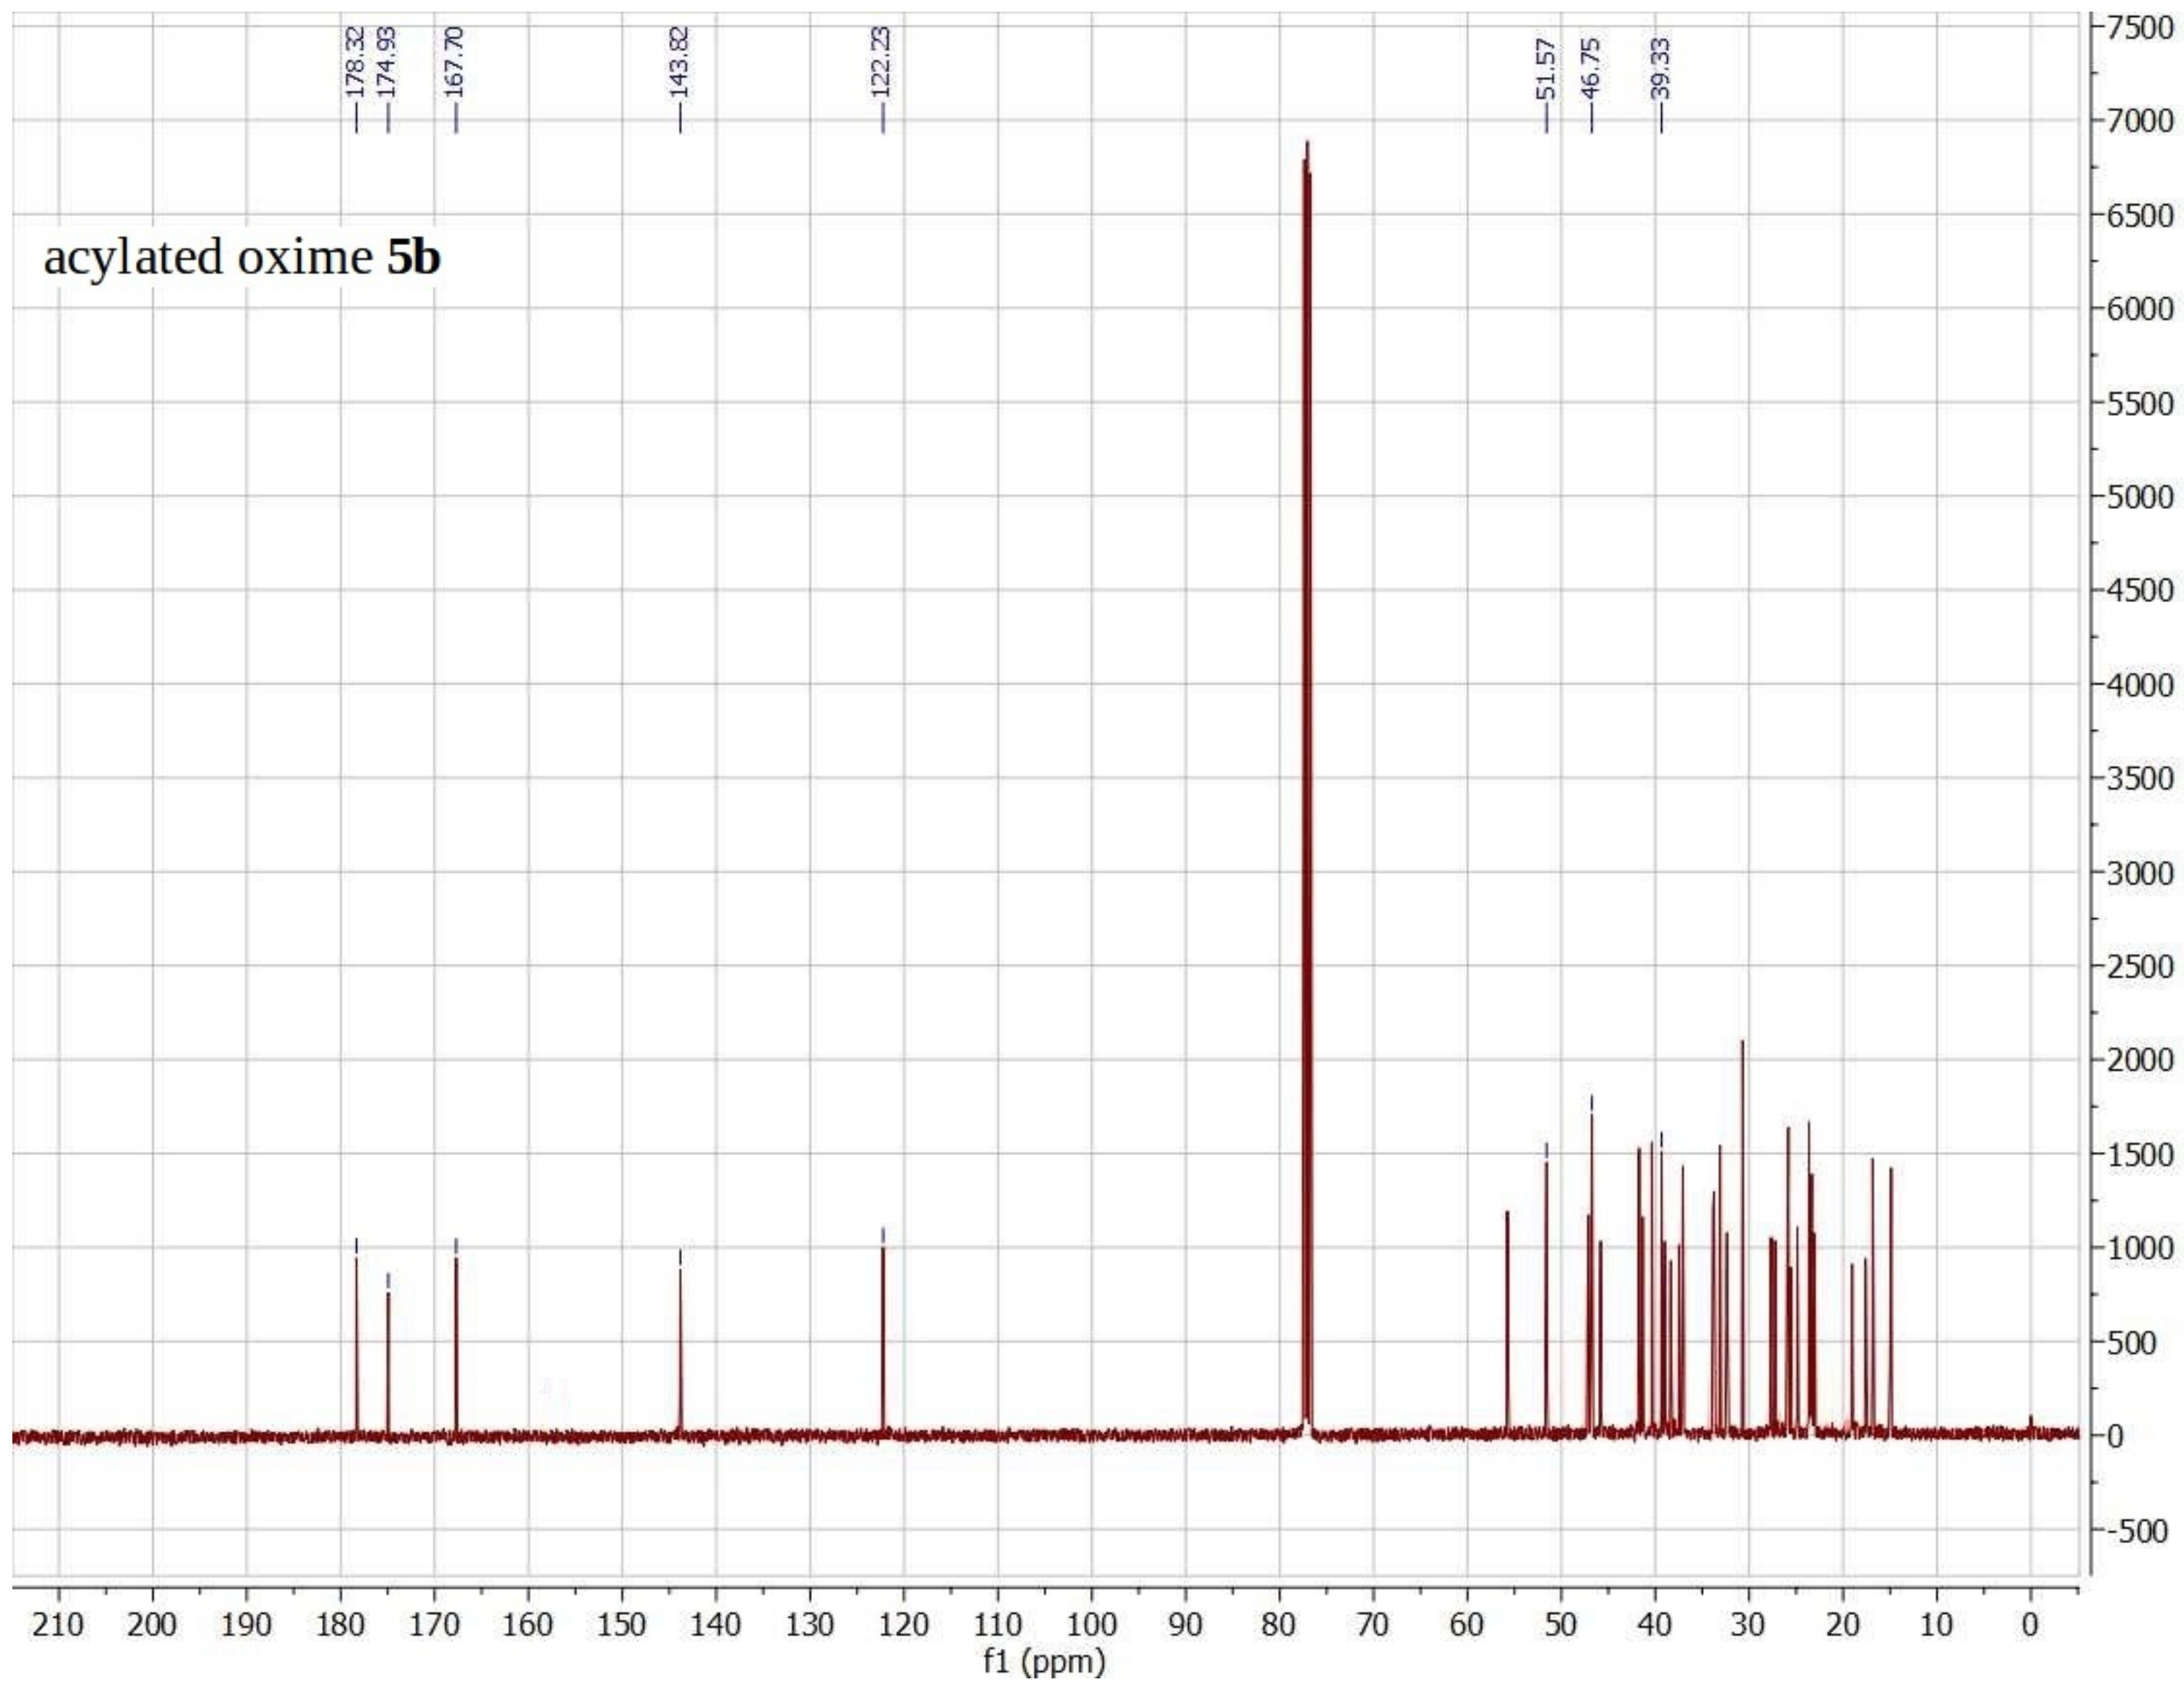

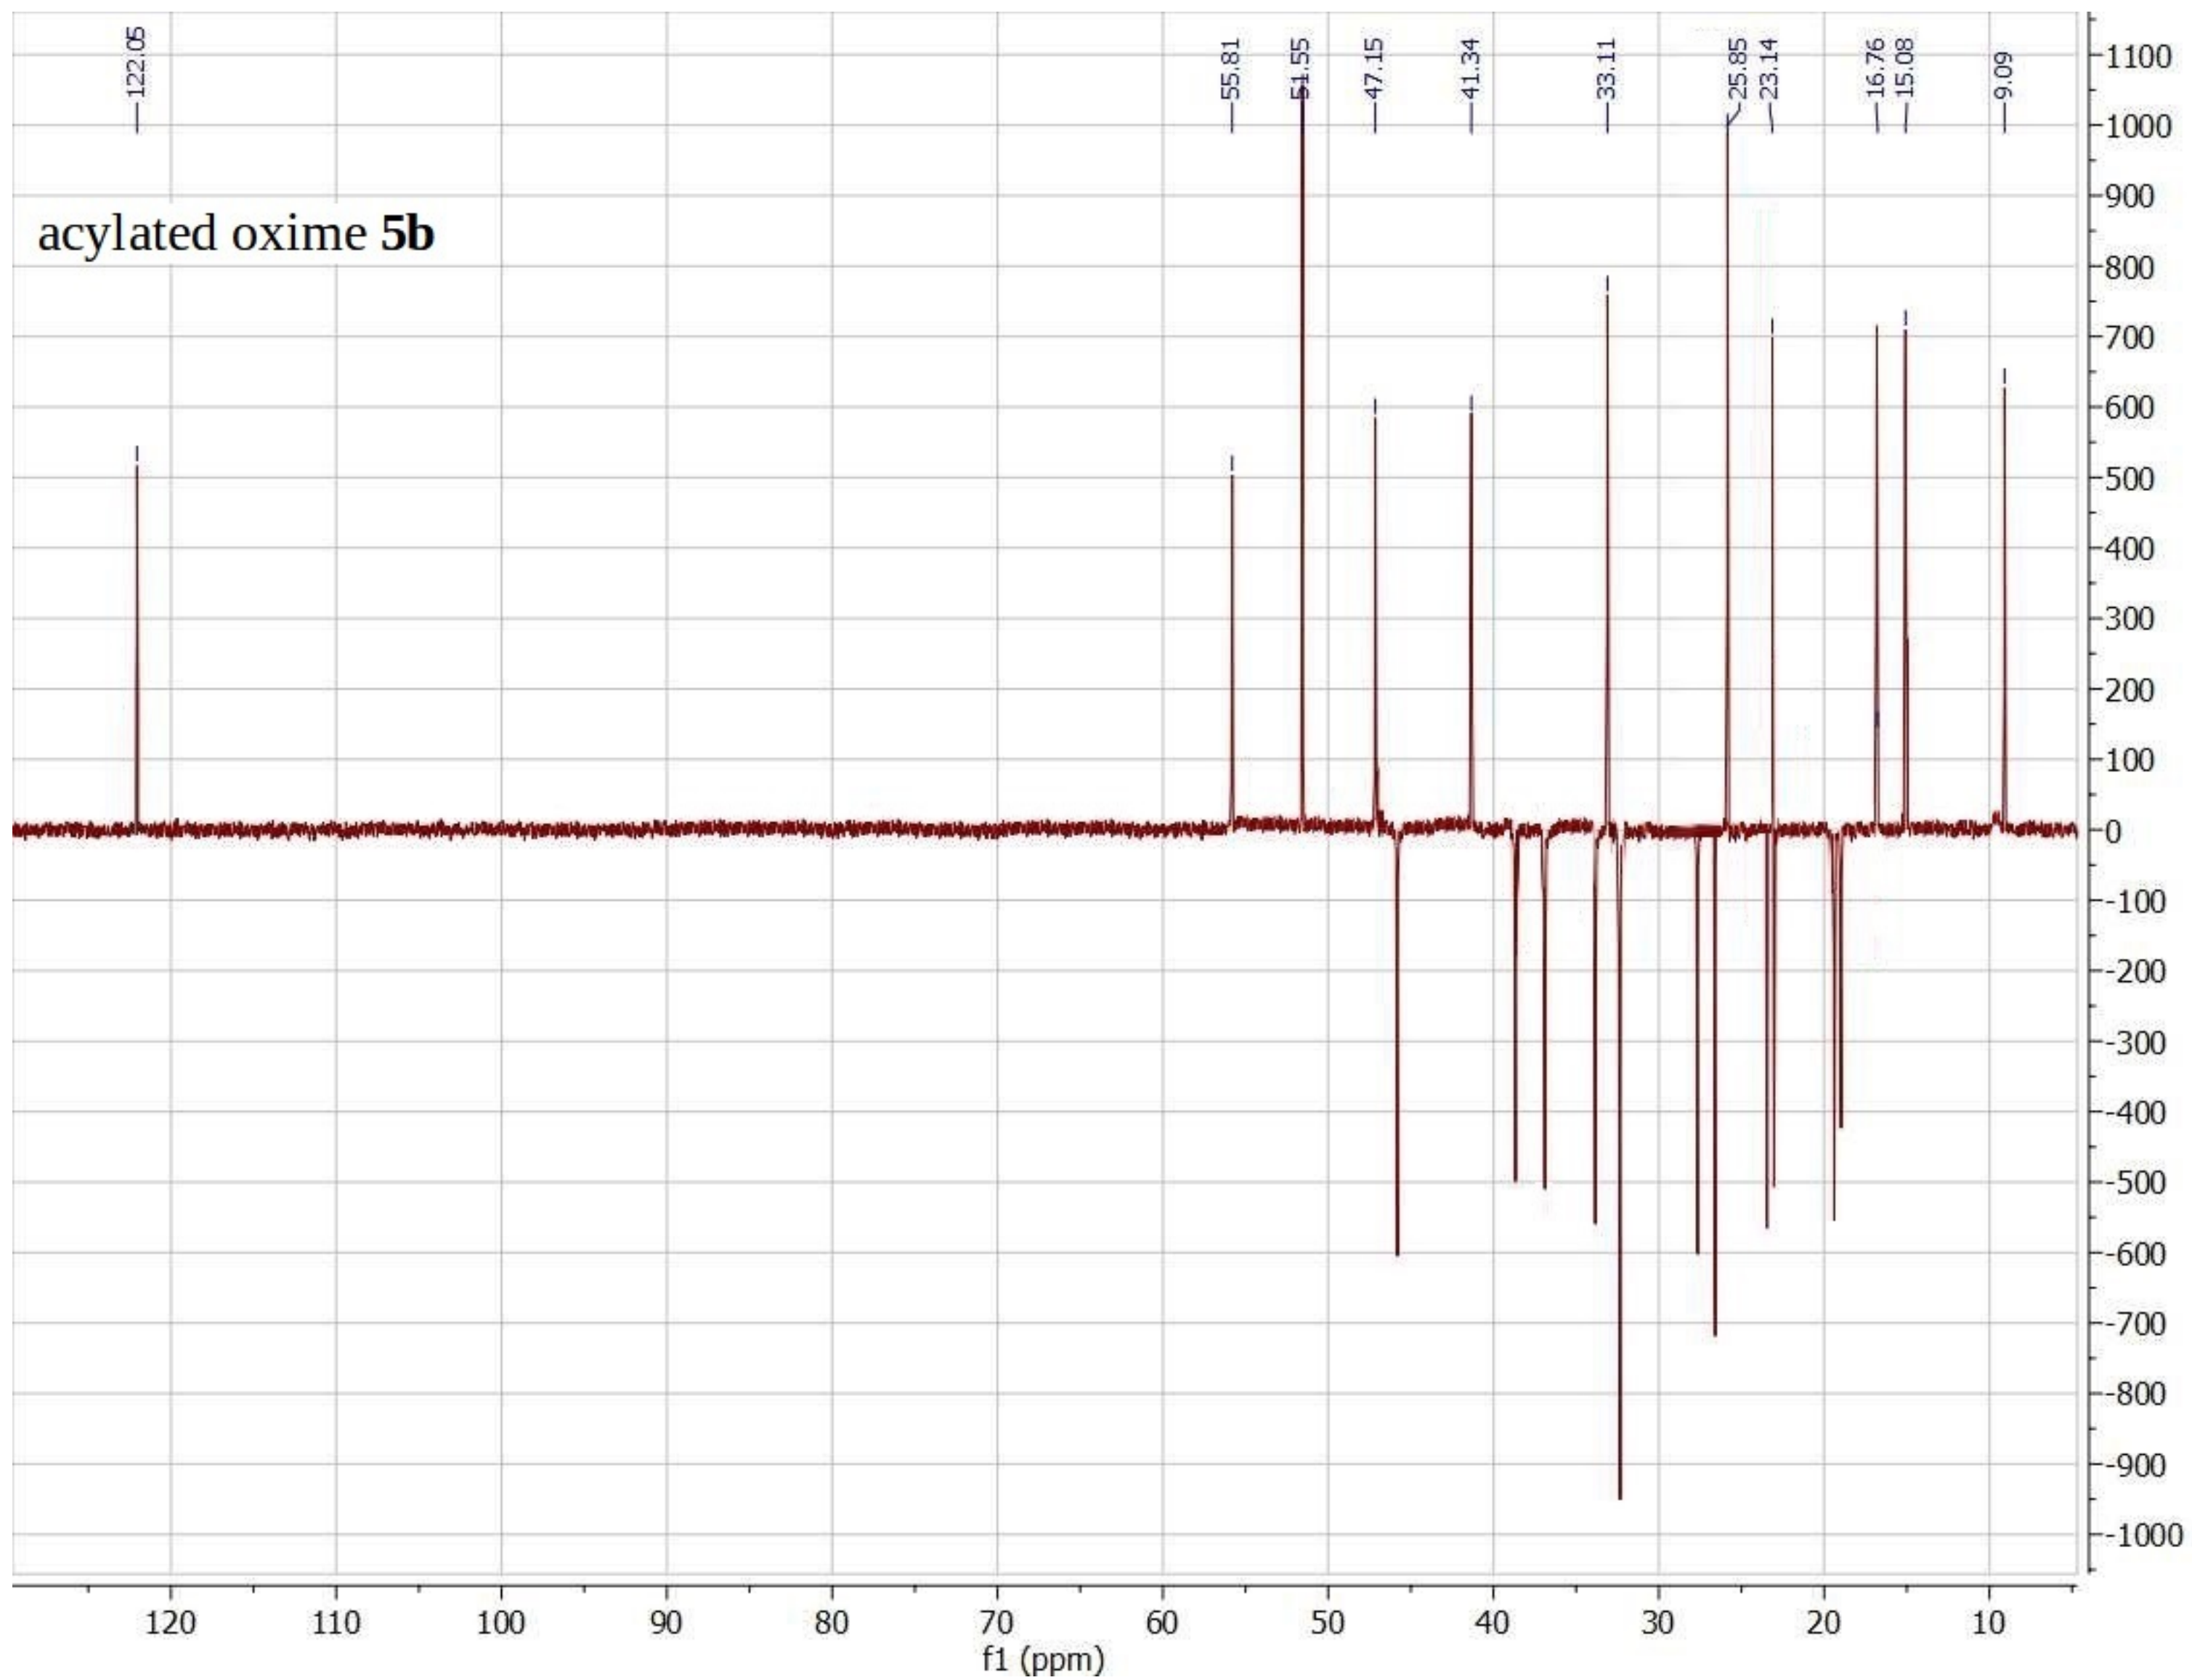

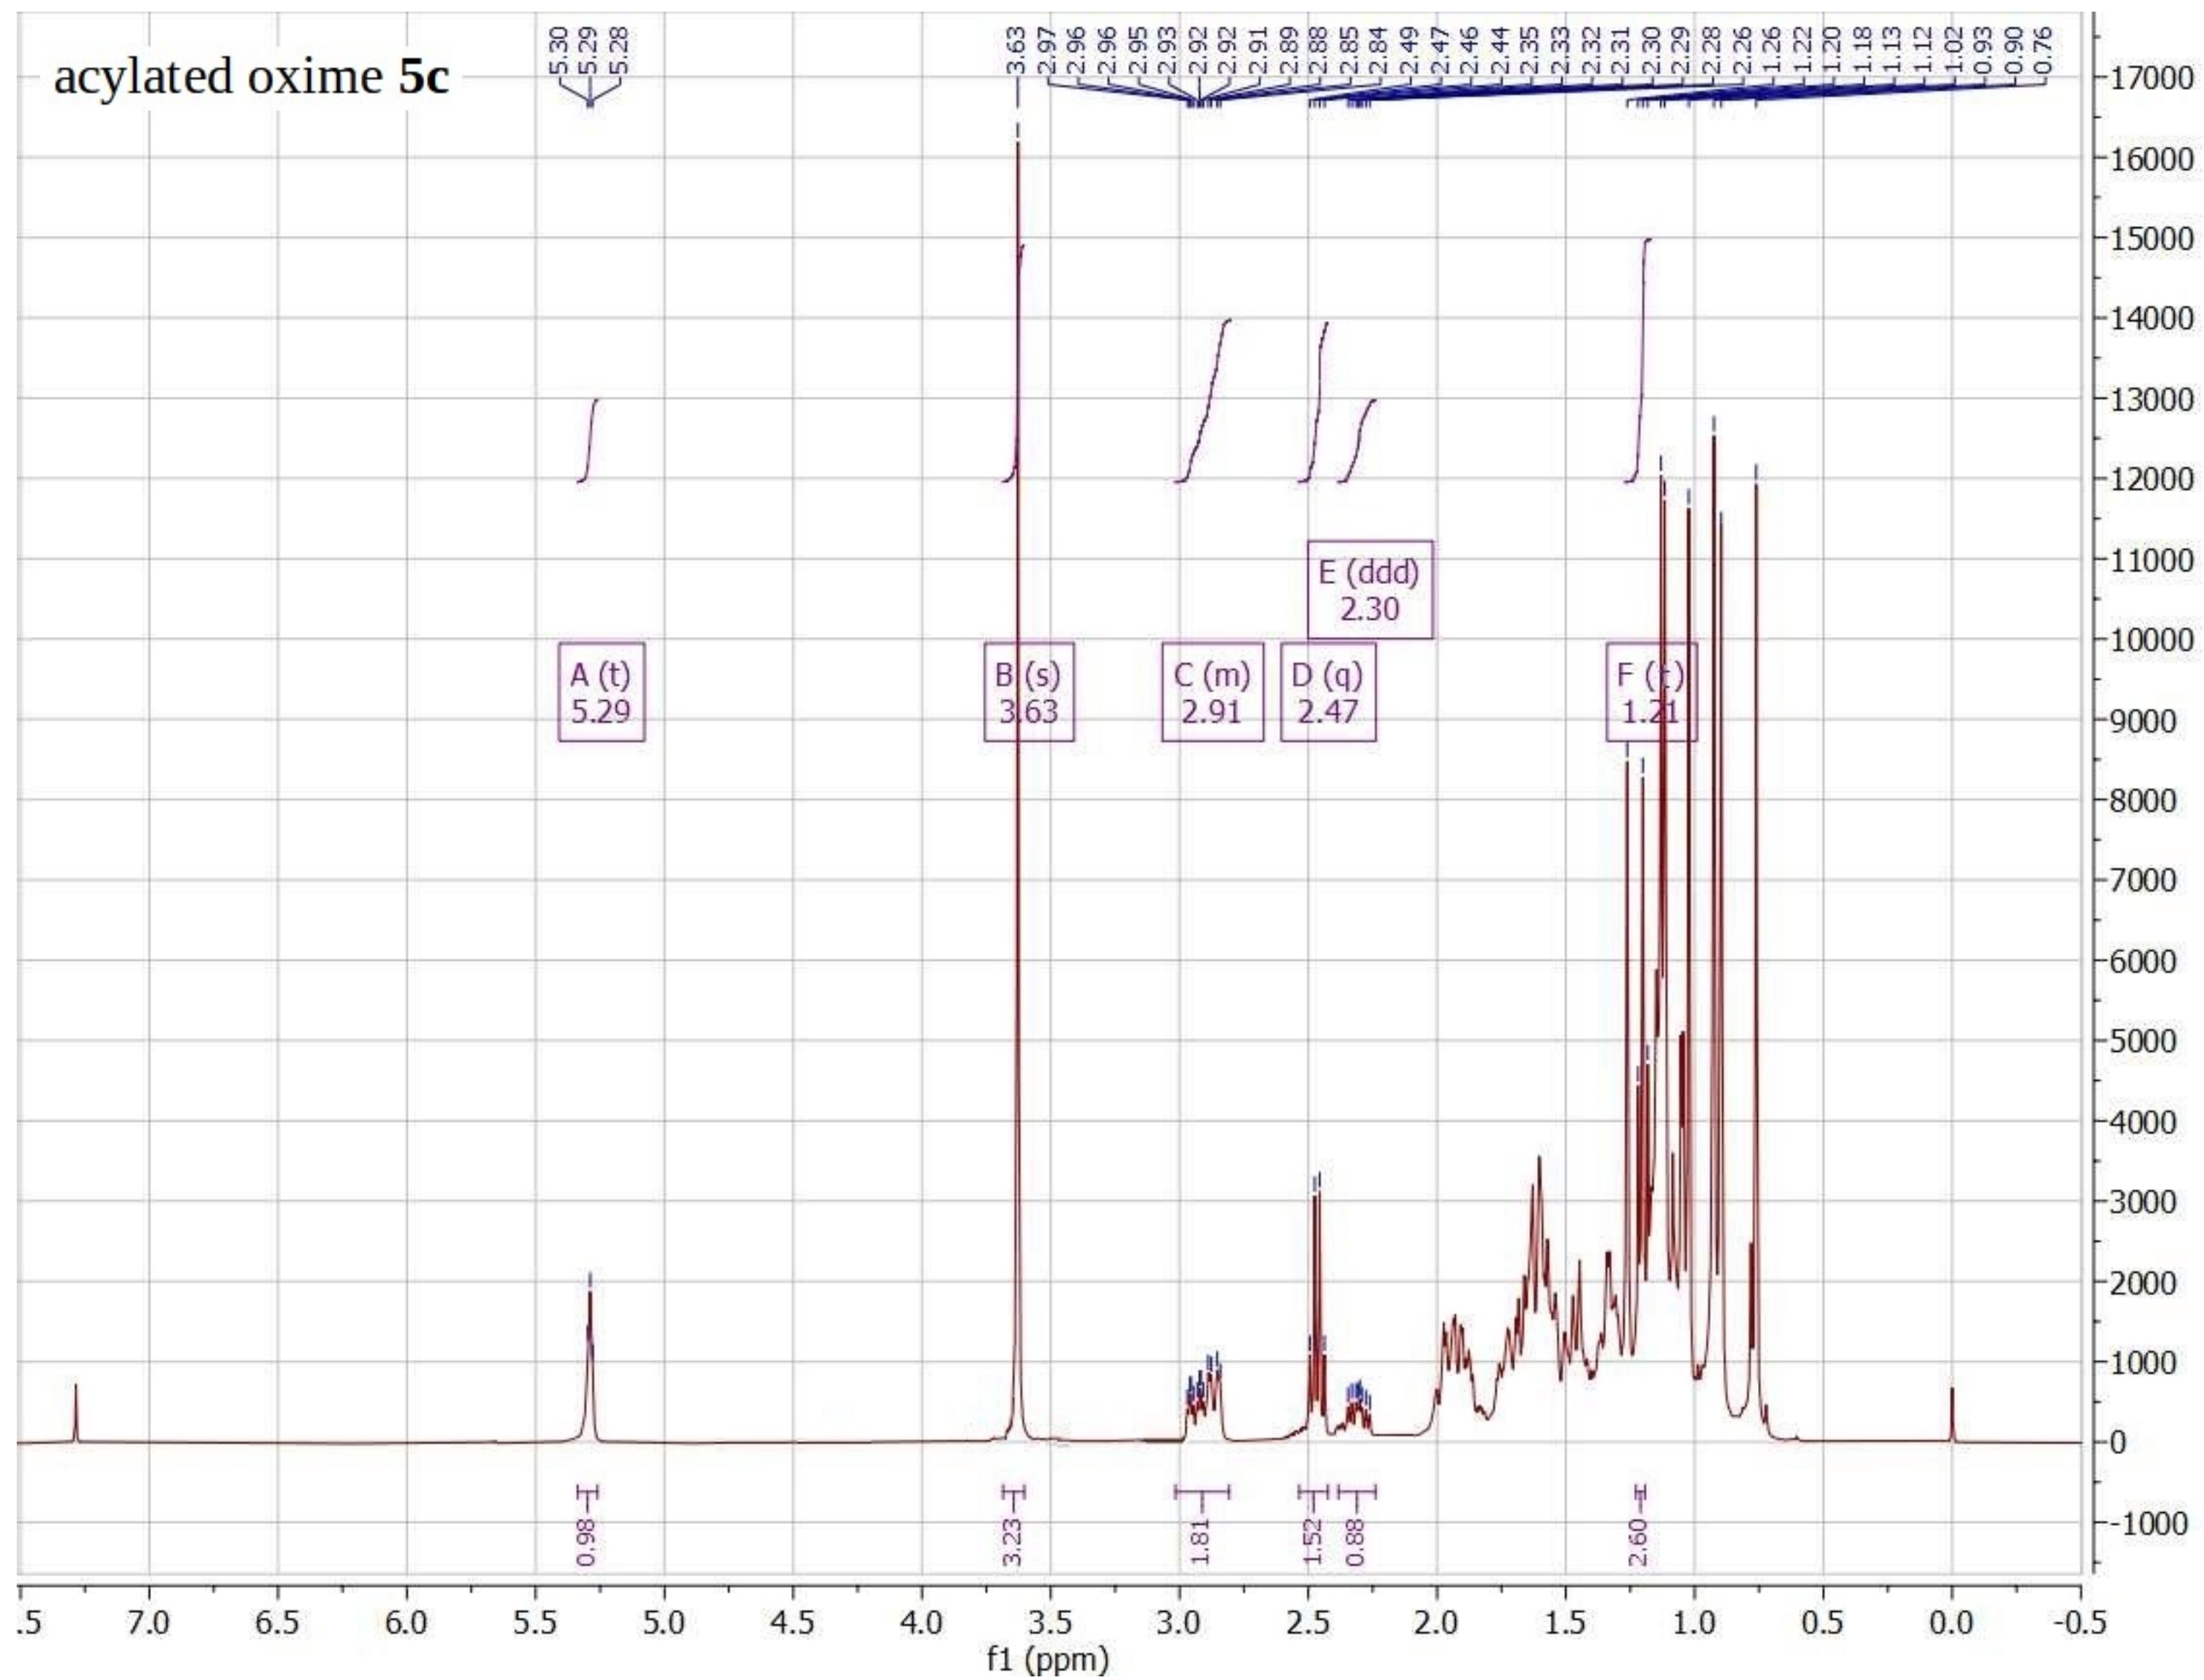



acylated oxime 5c

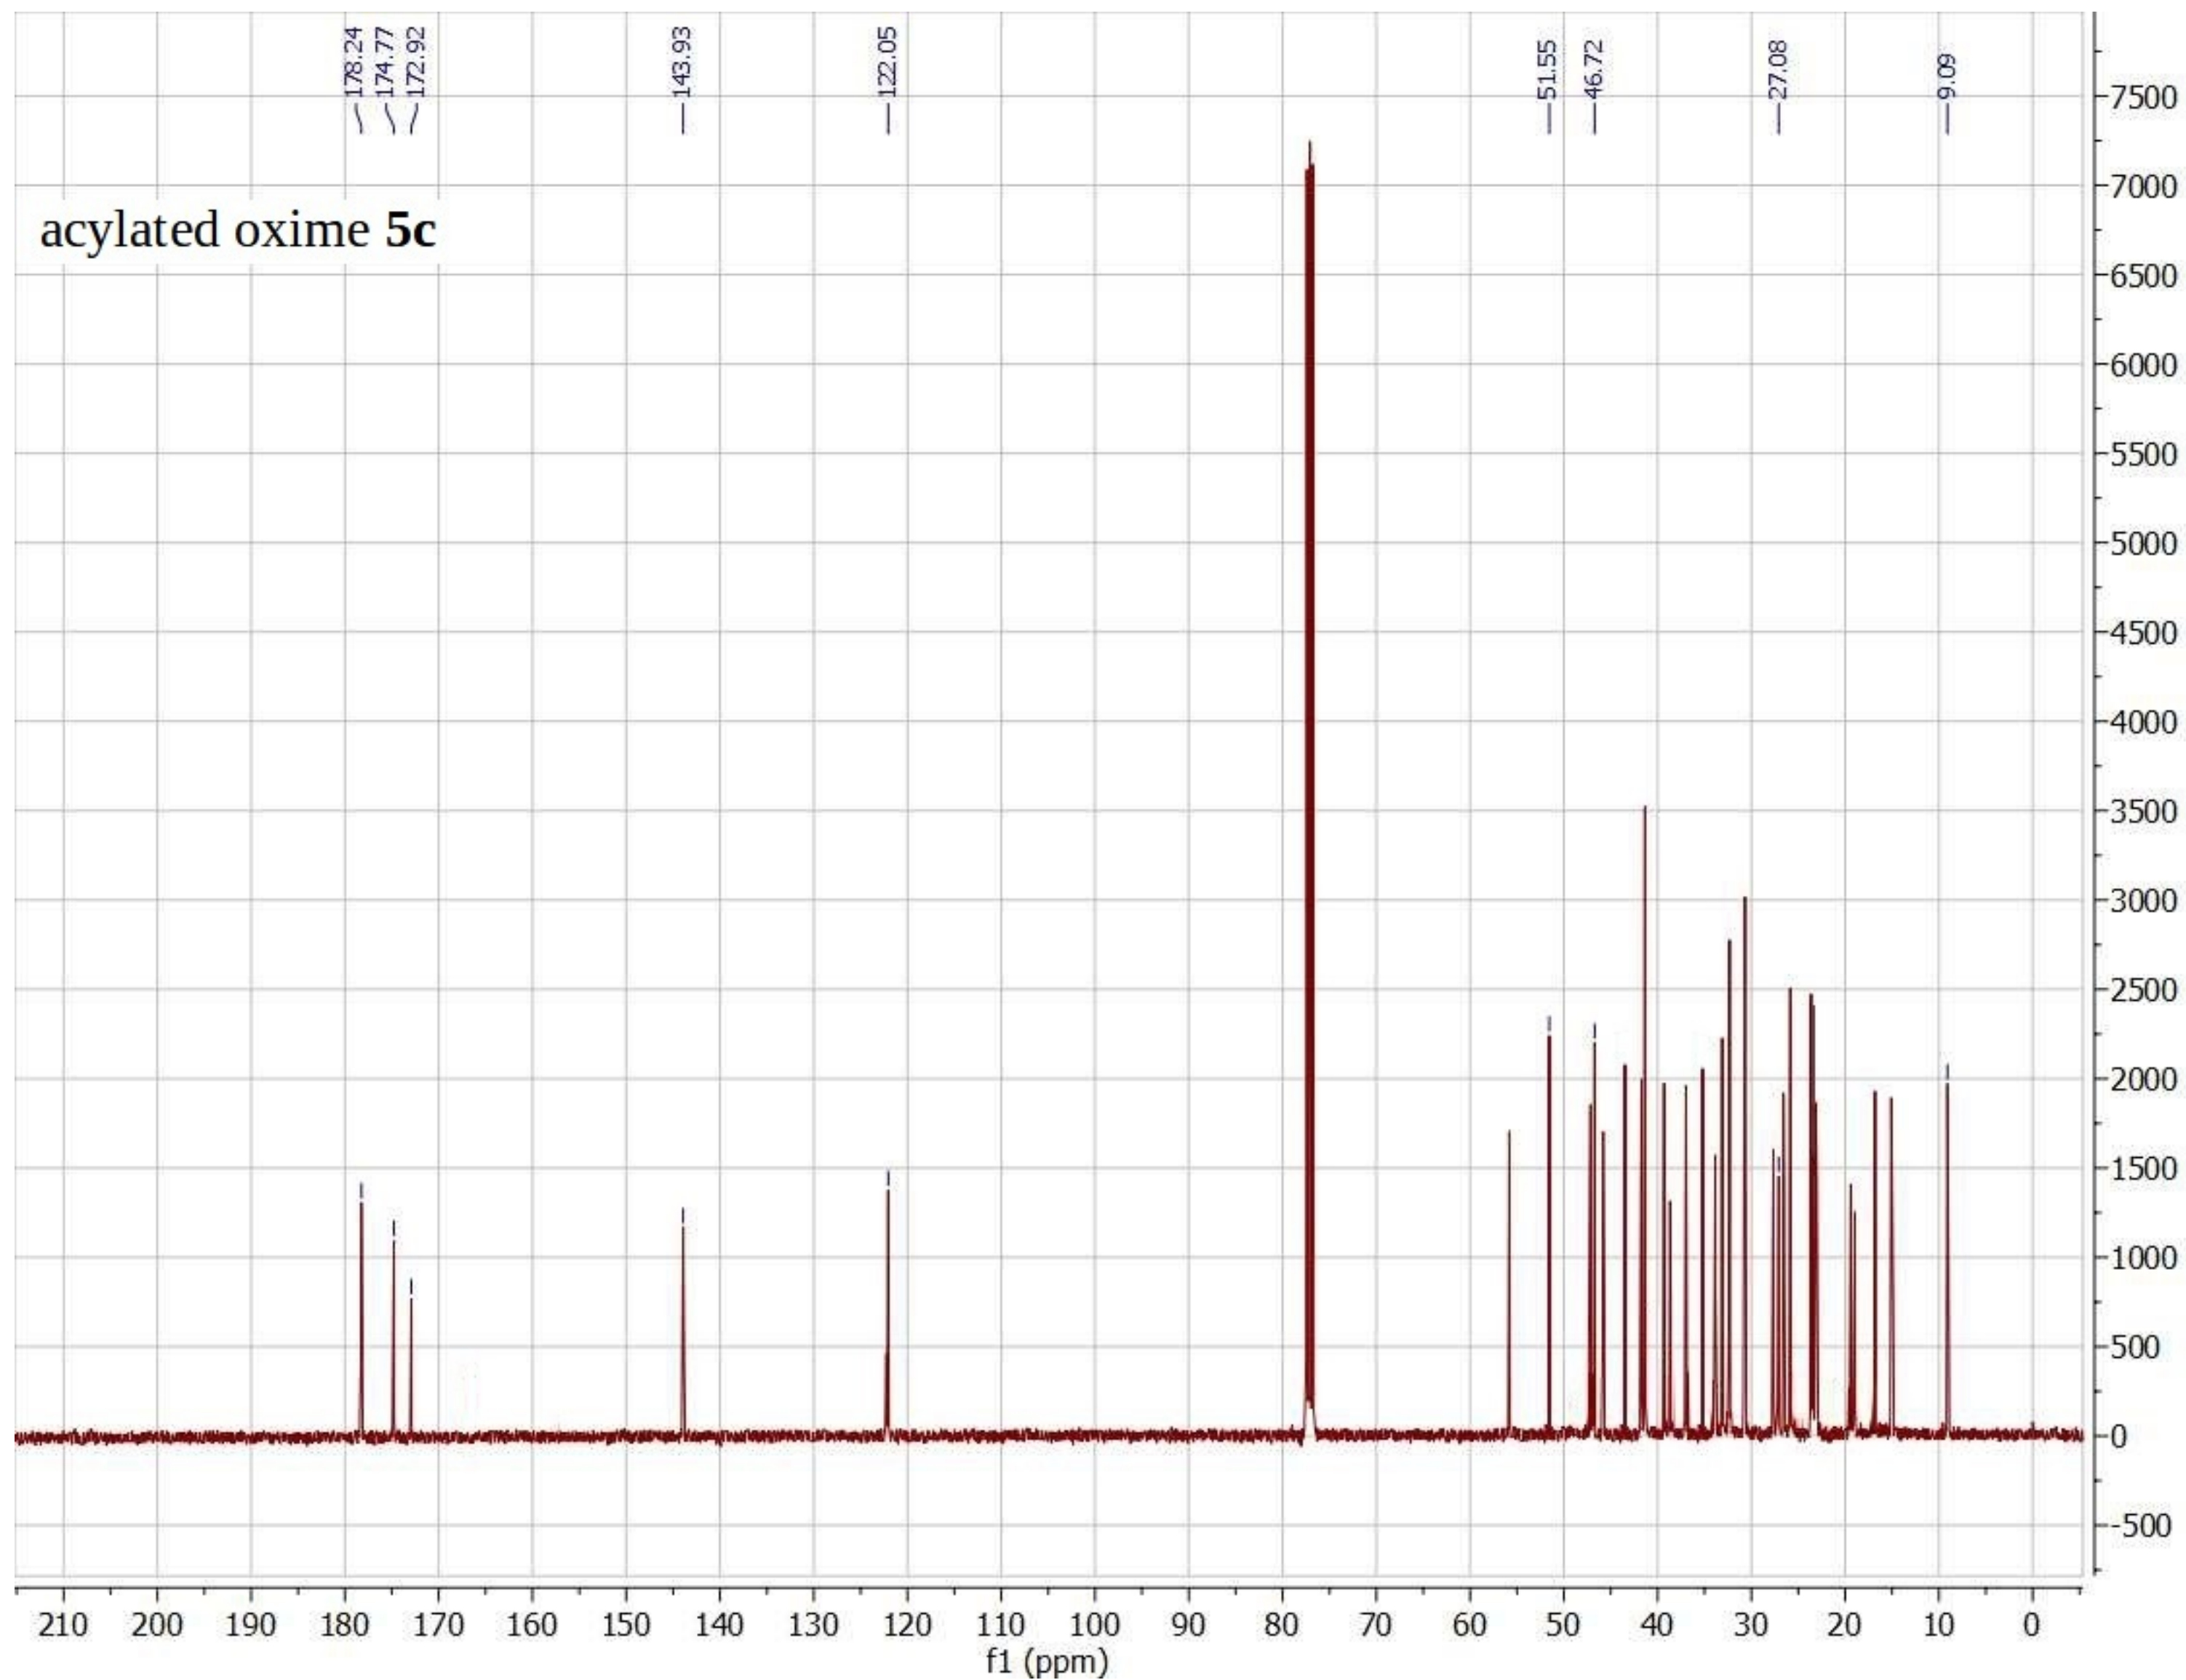

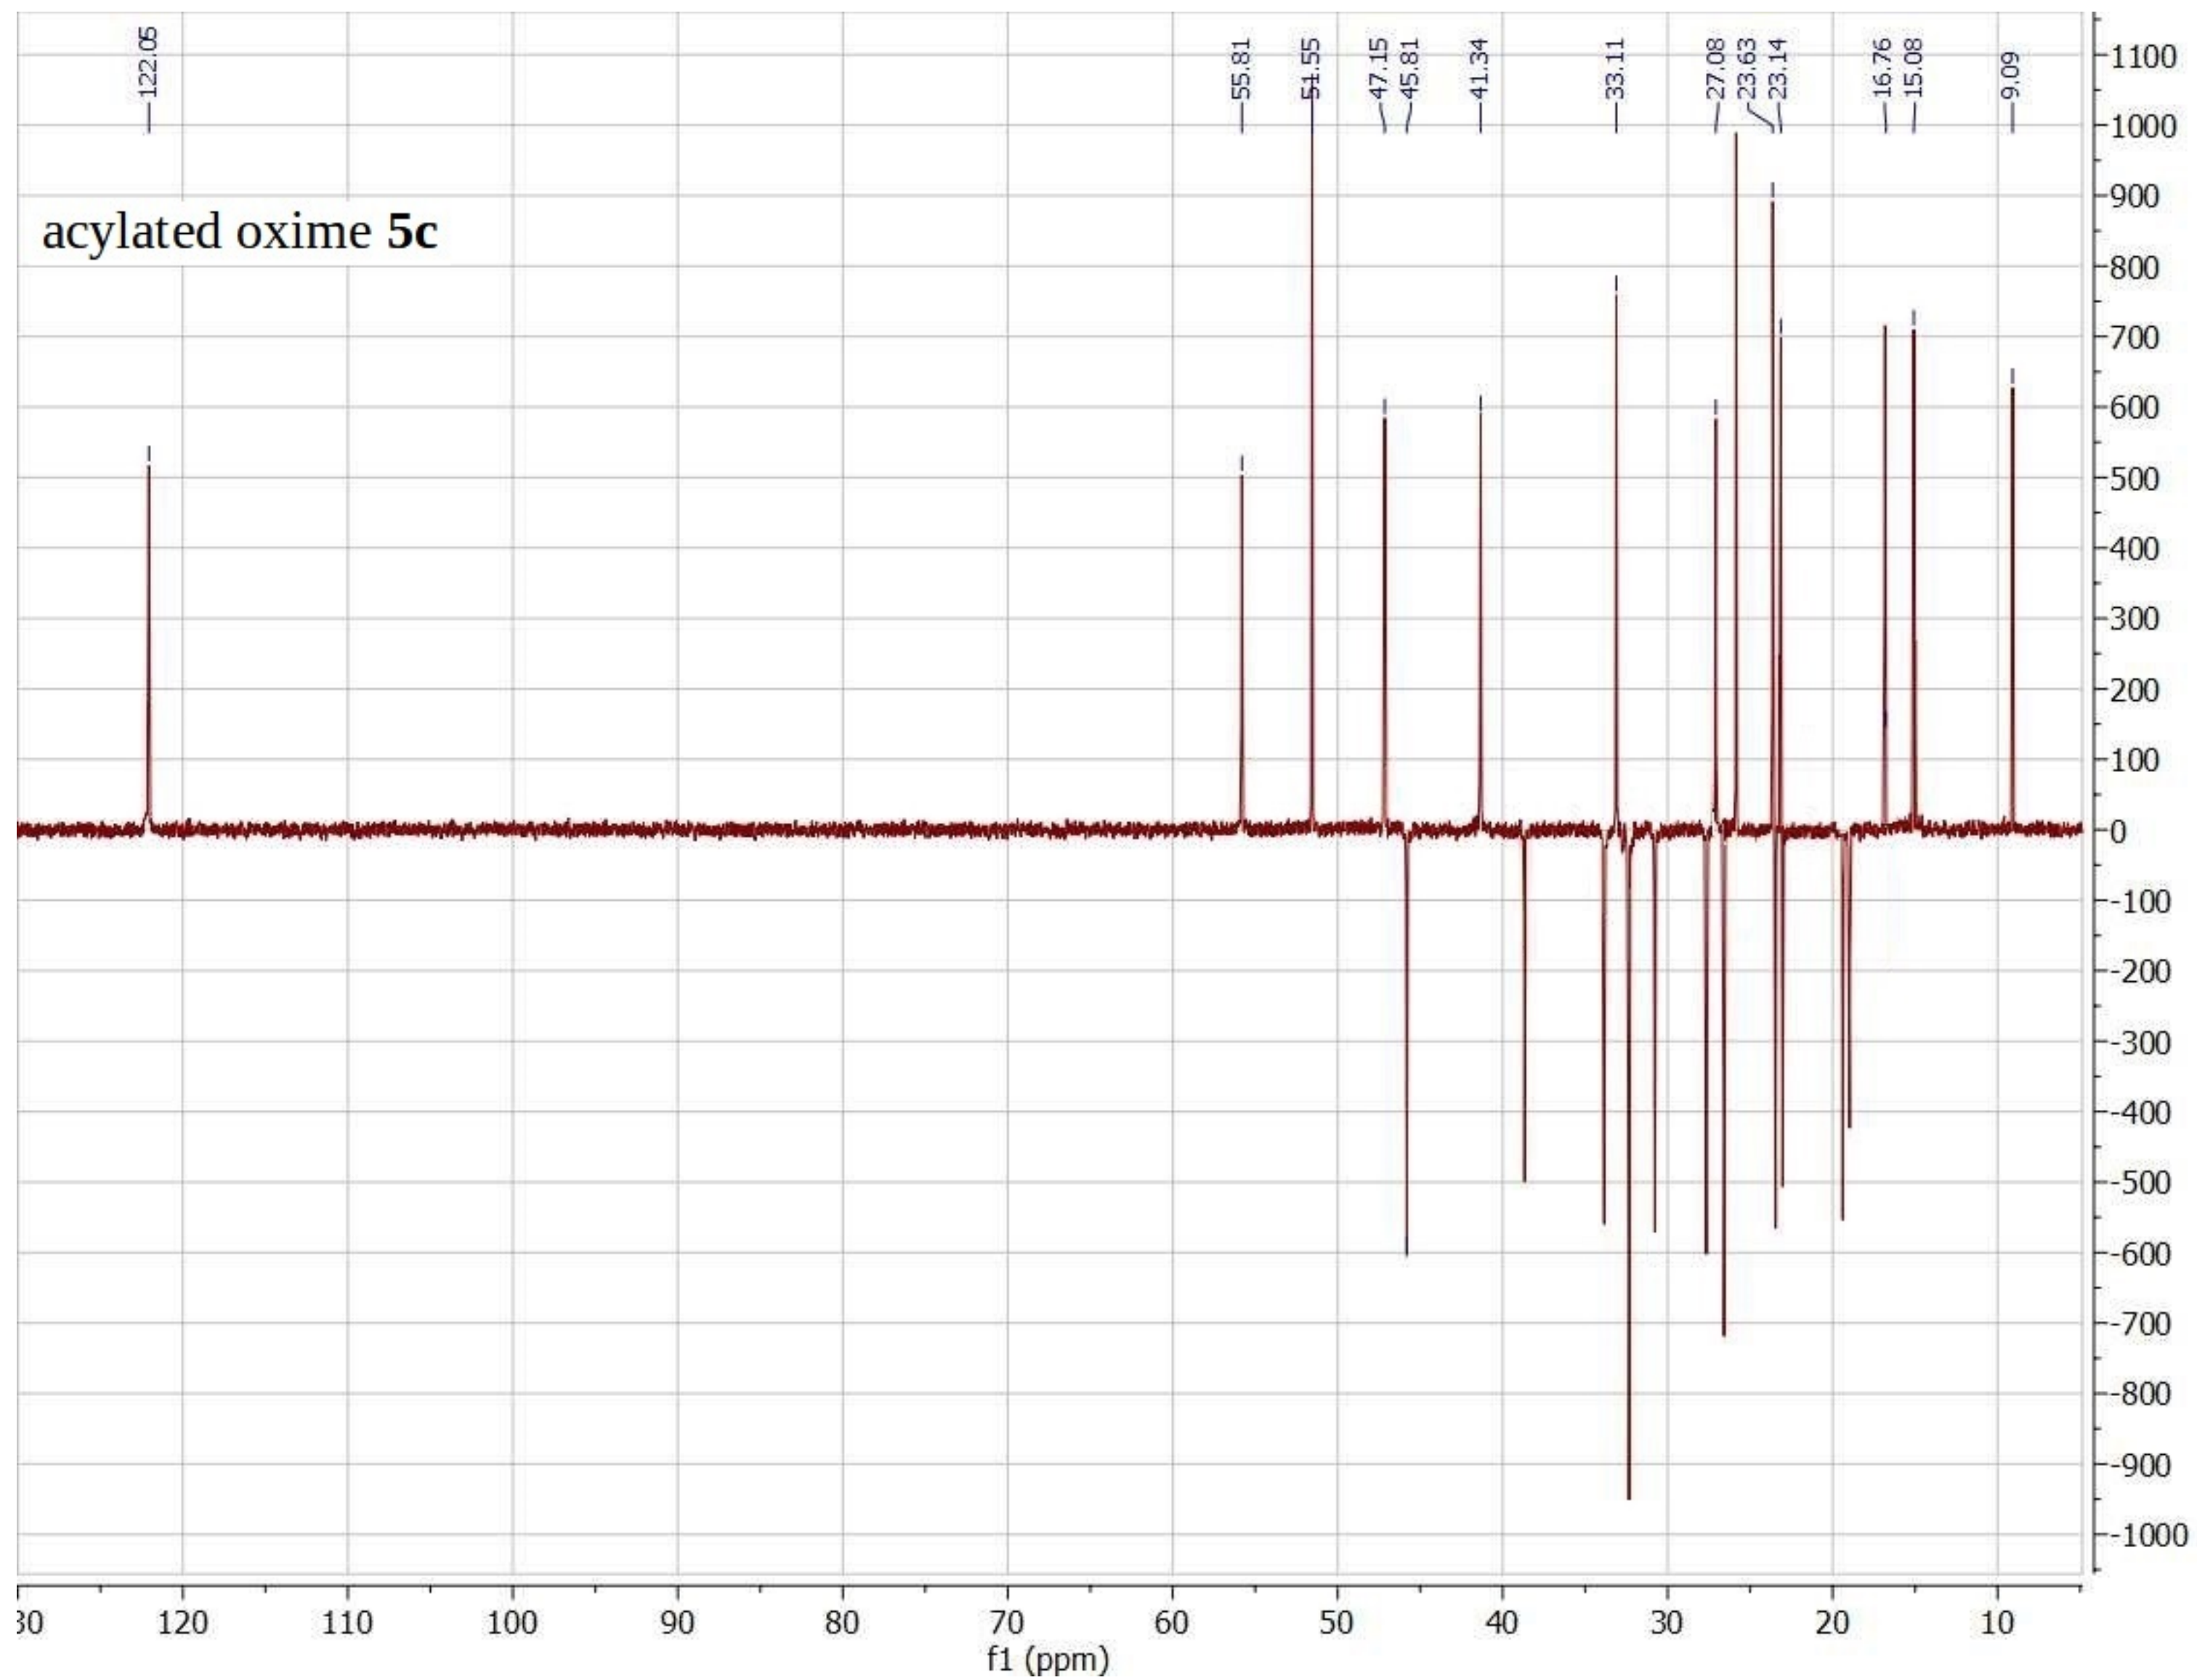

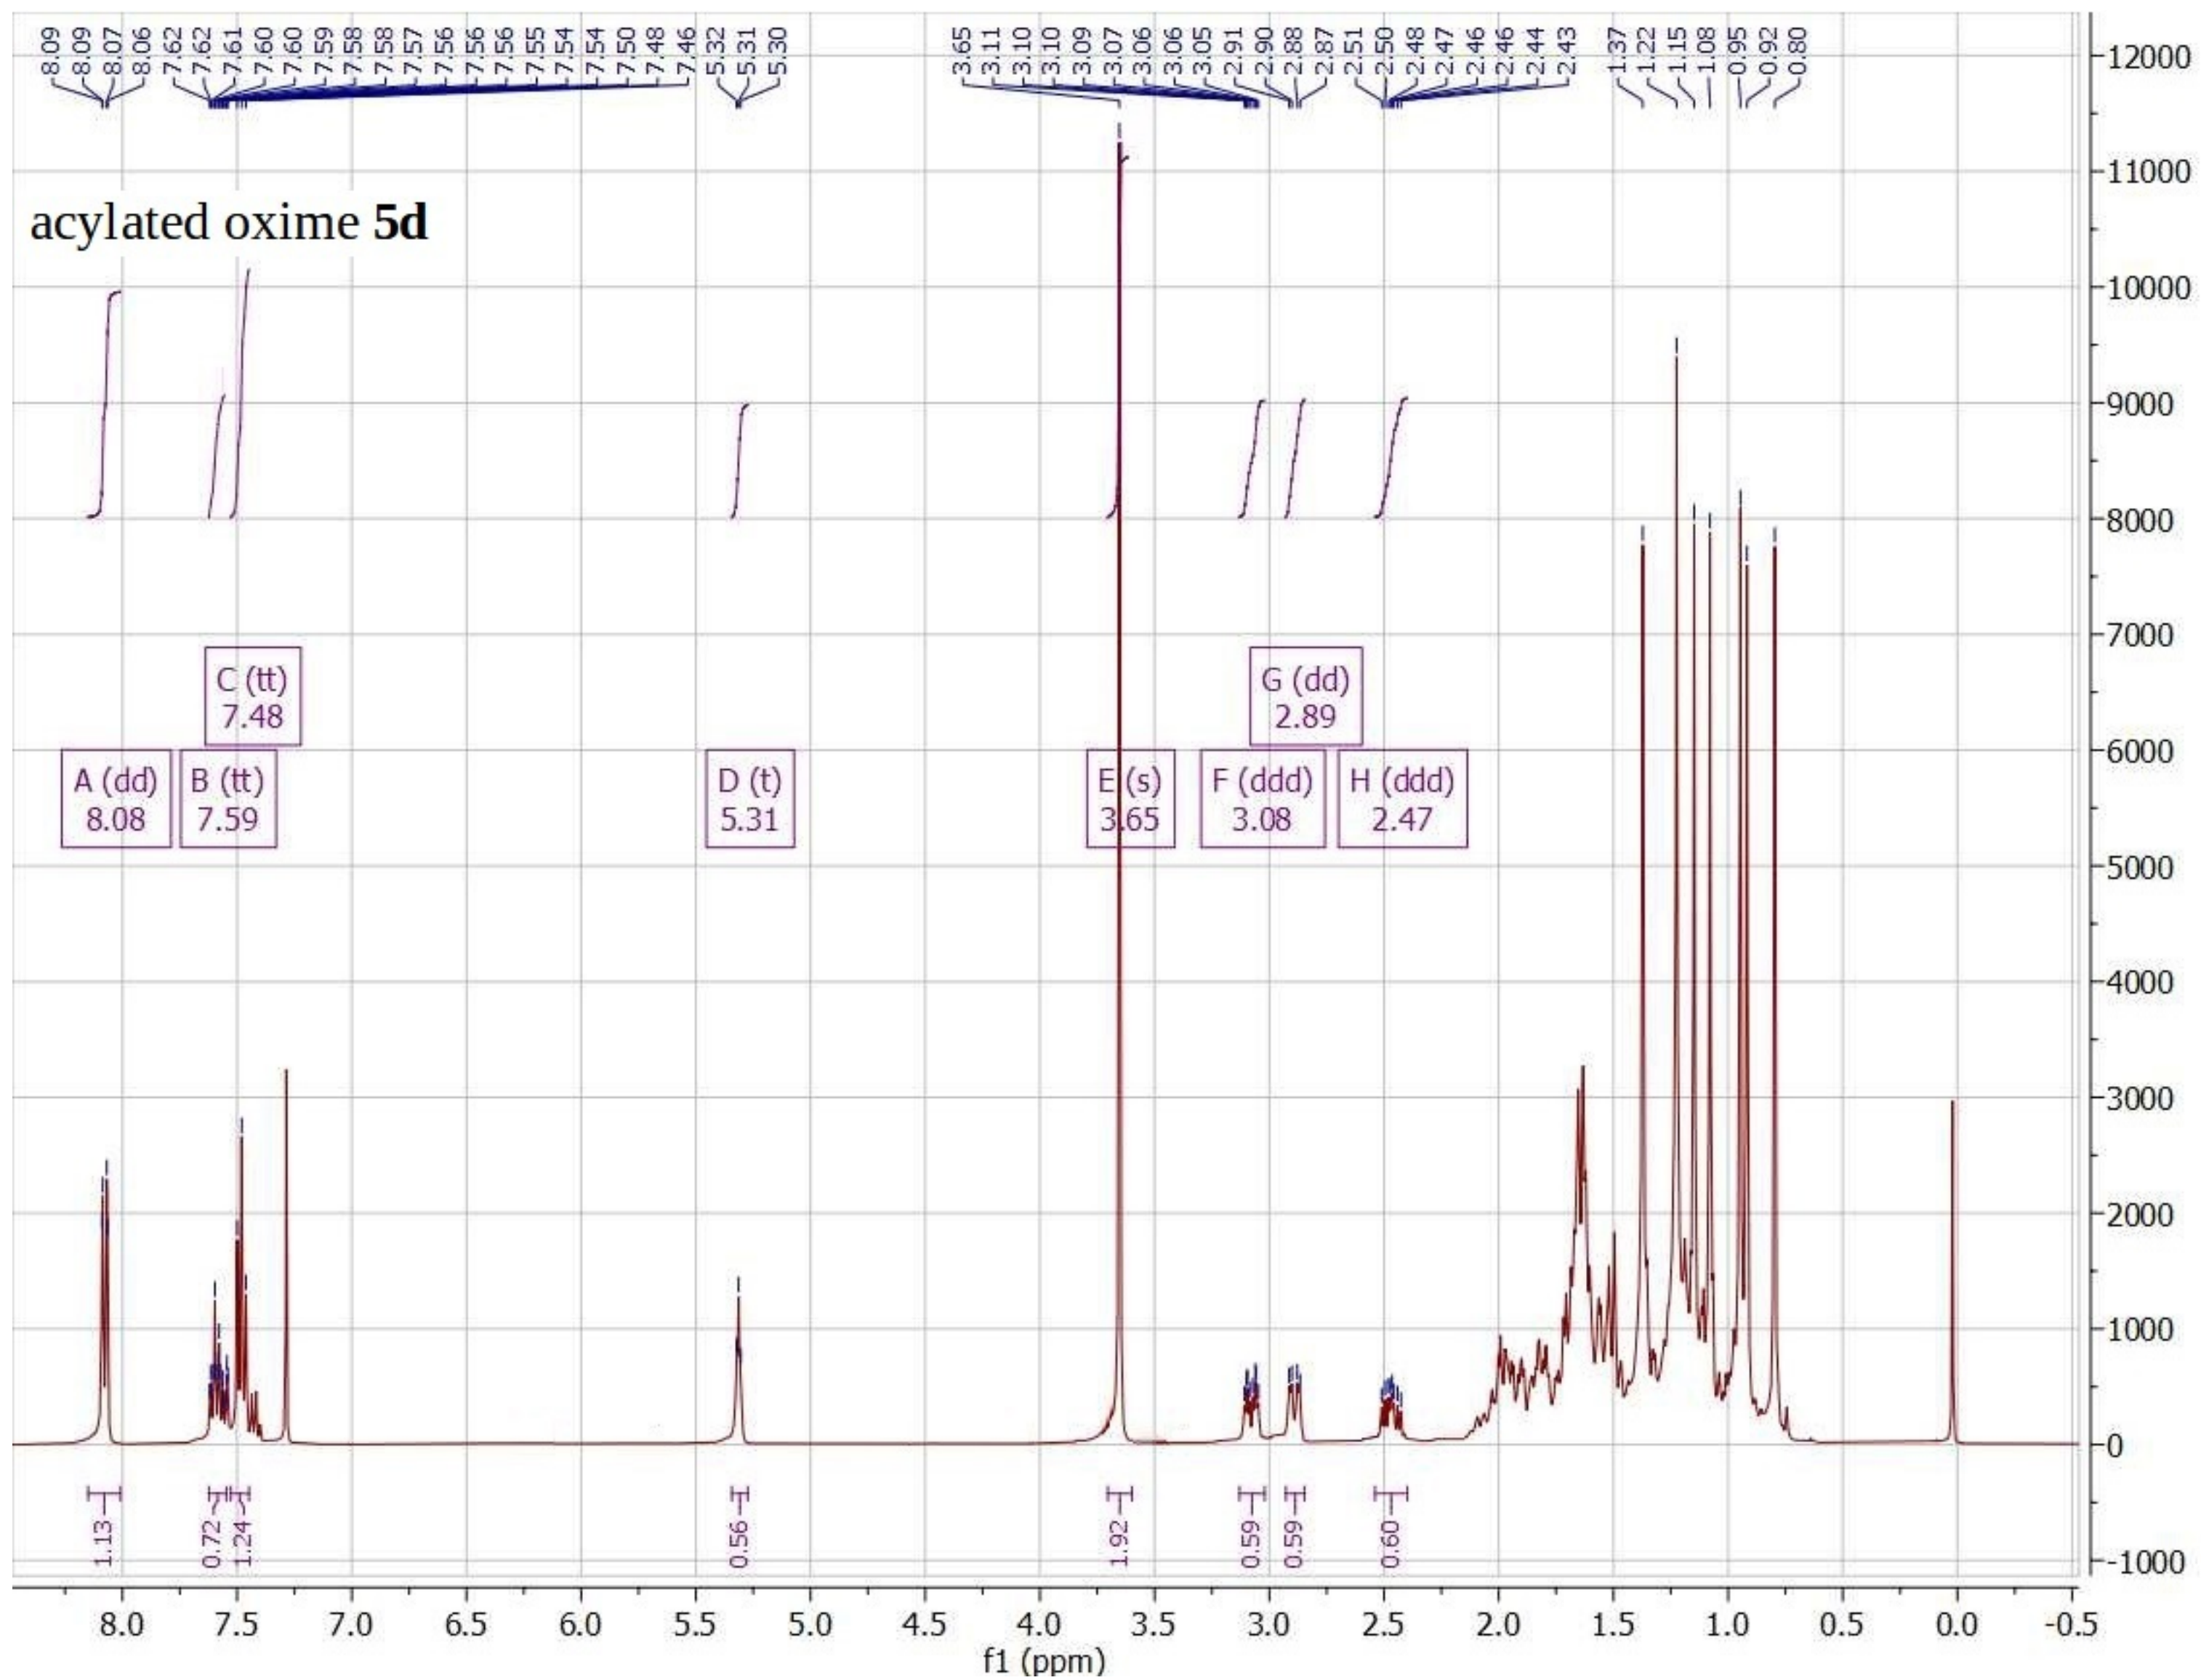



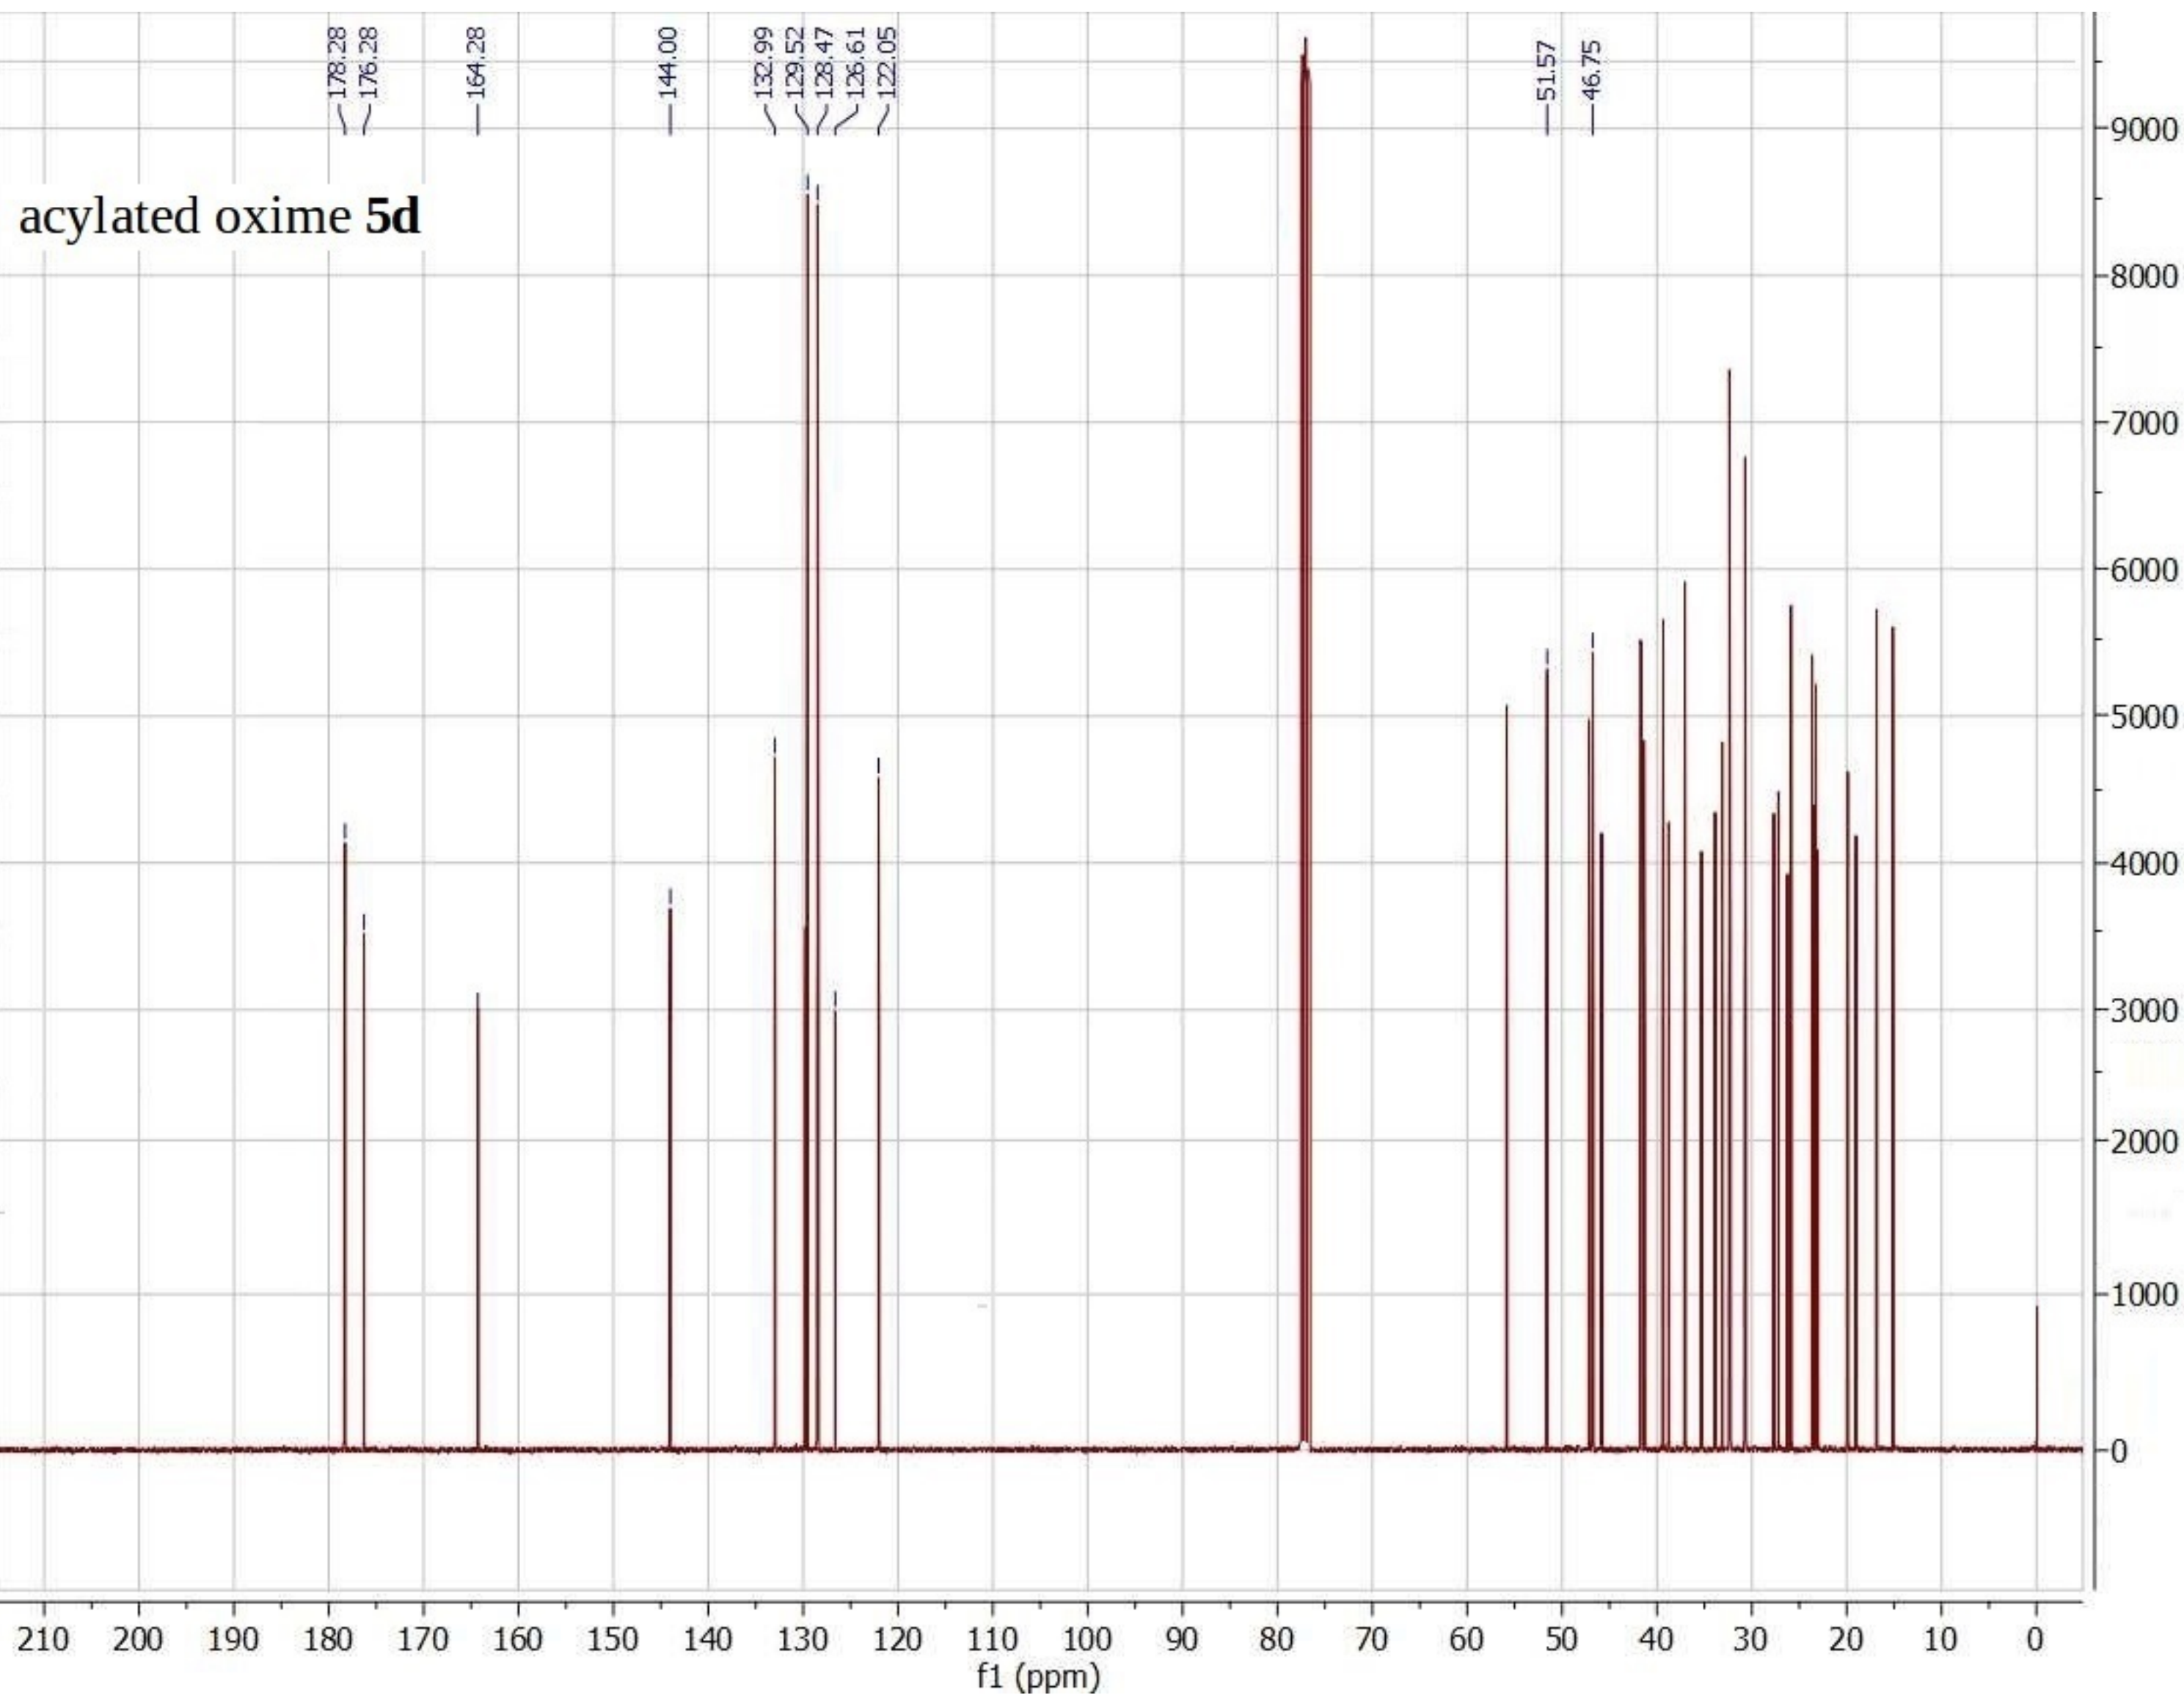

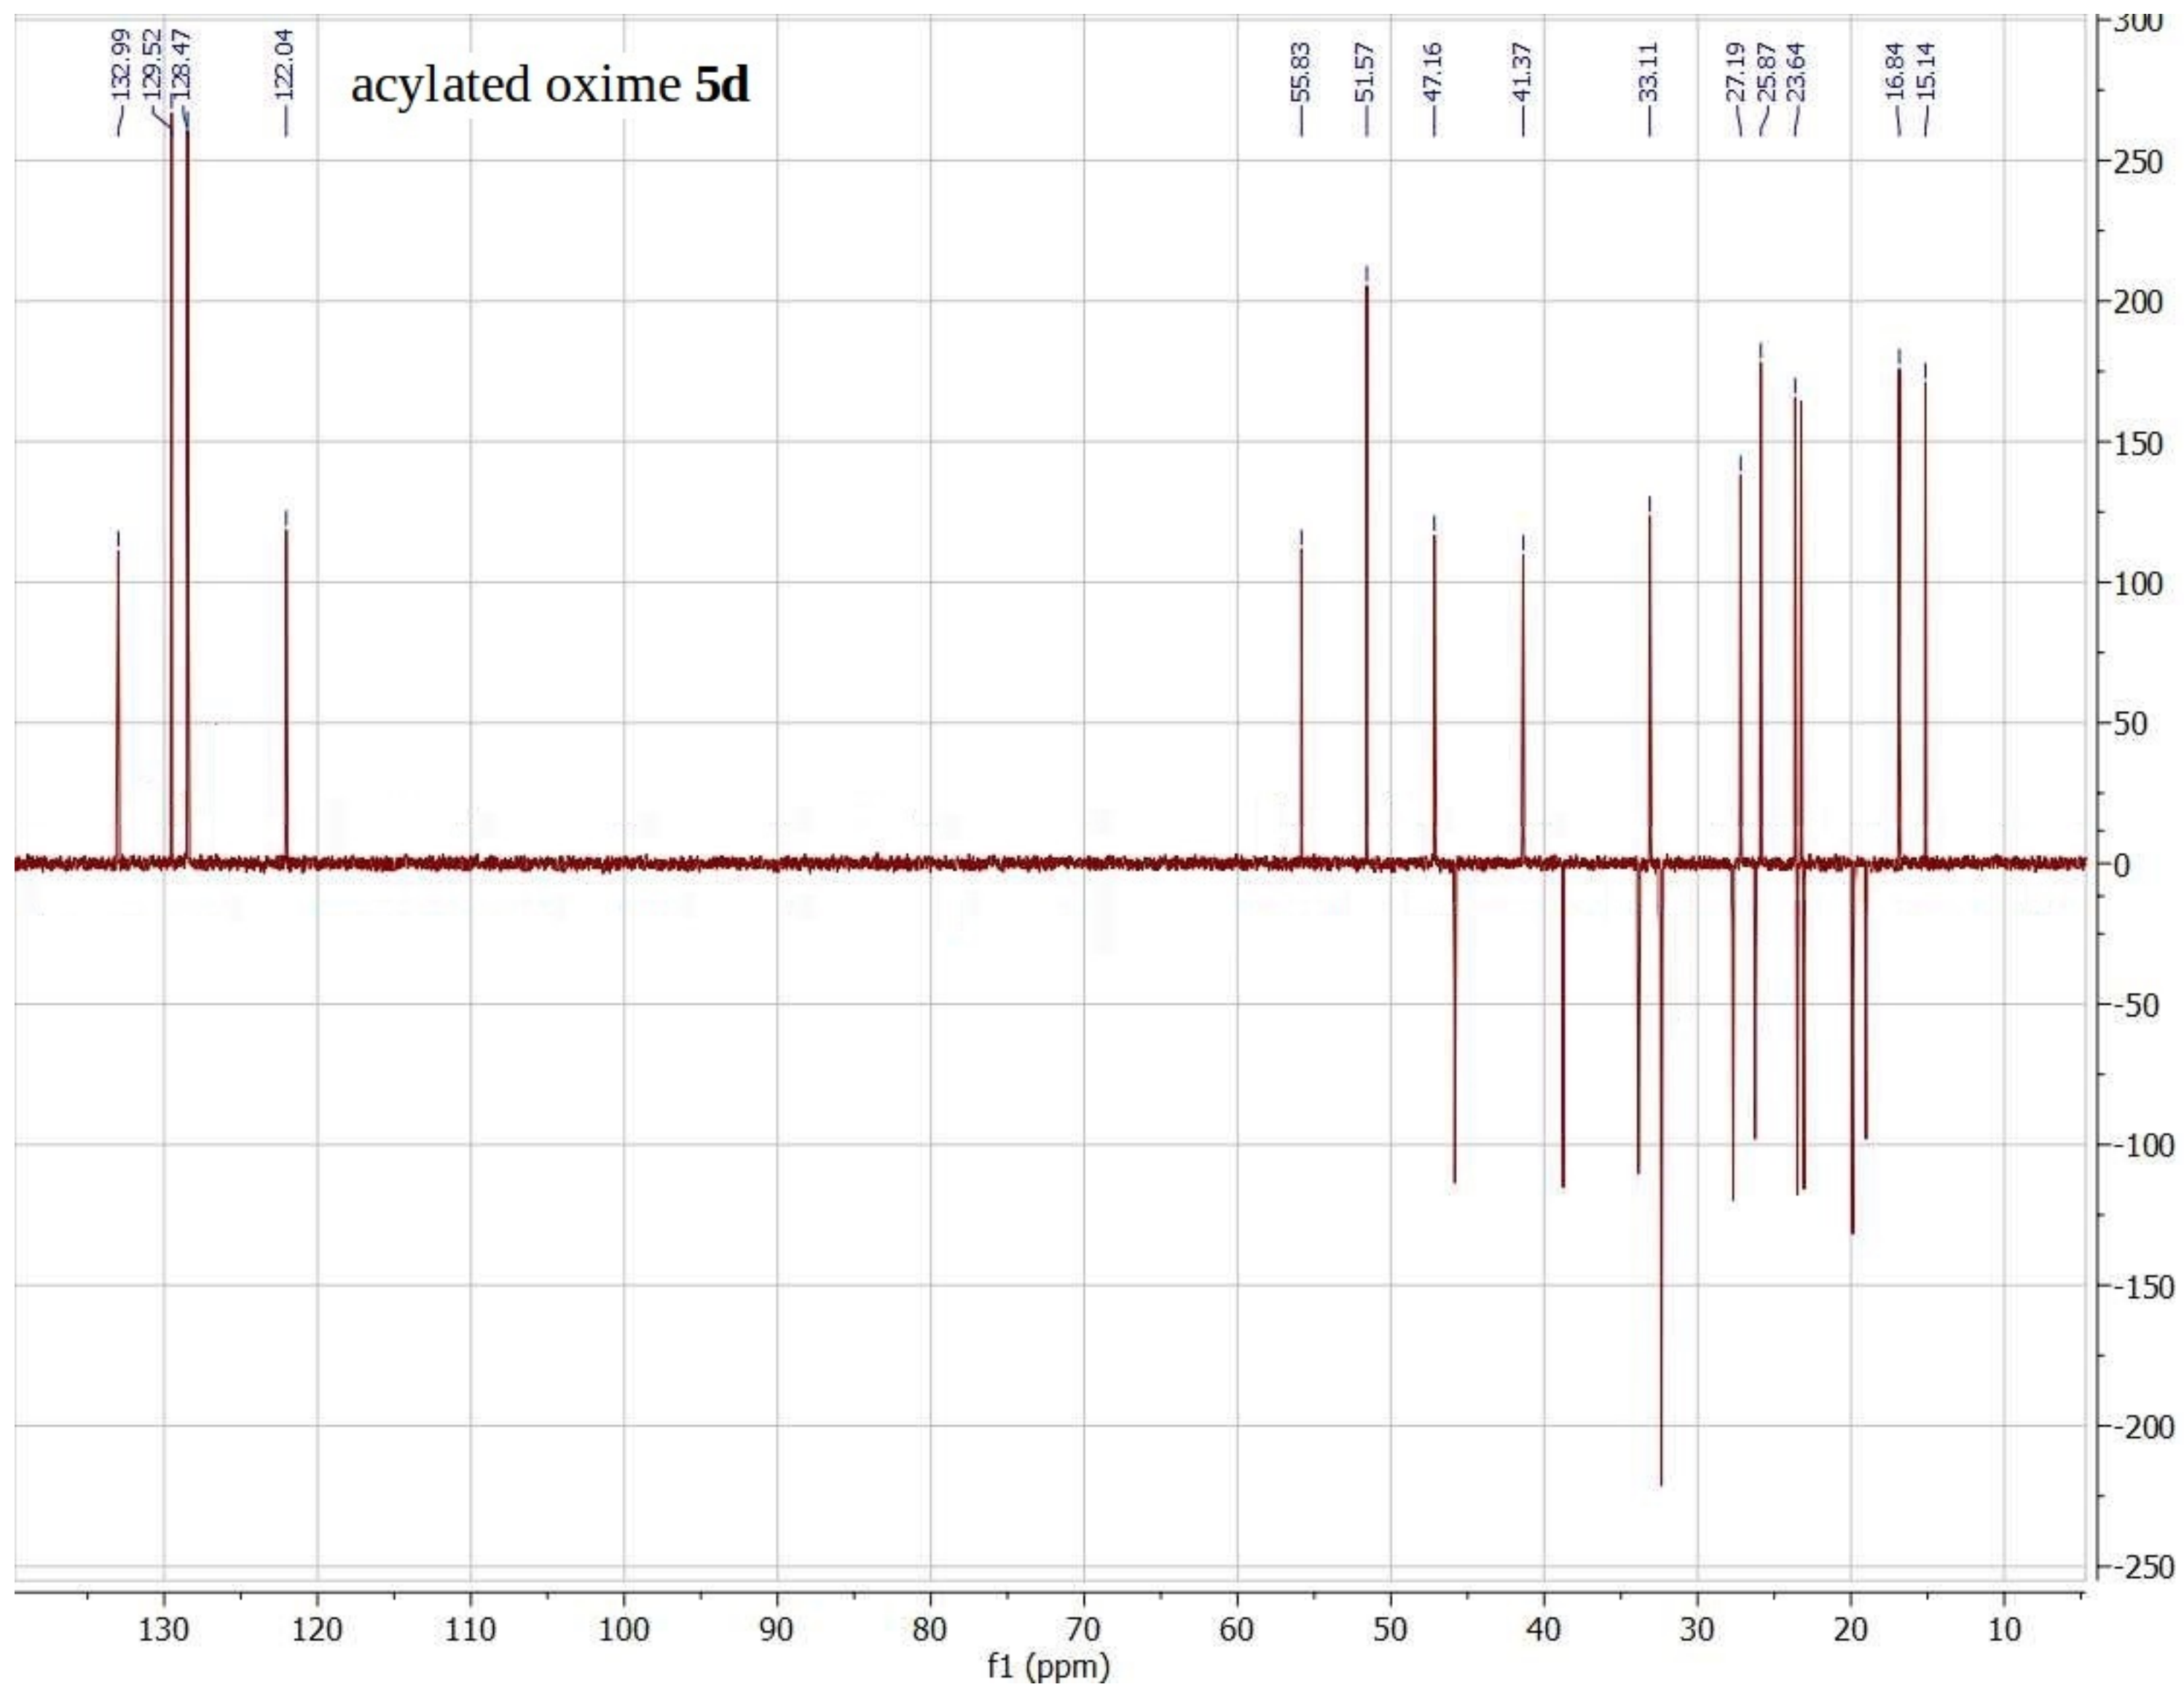

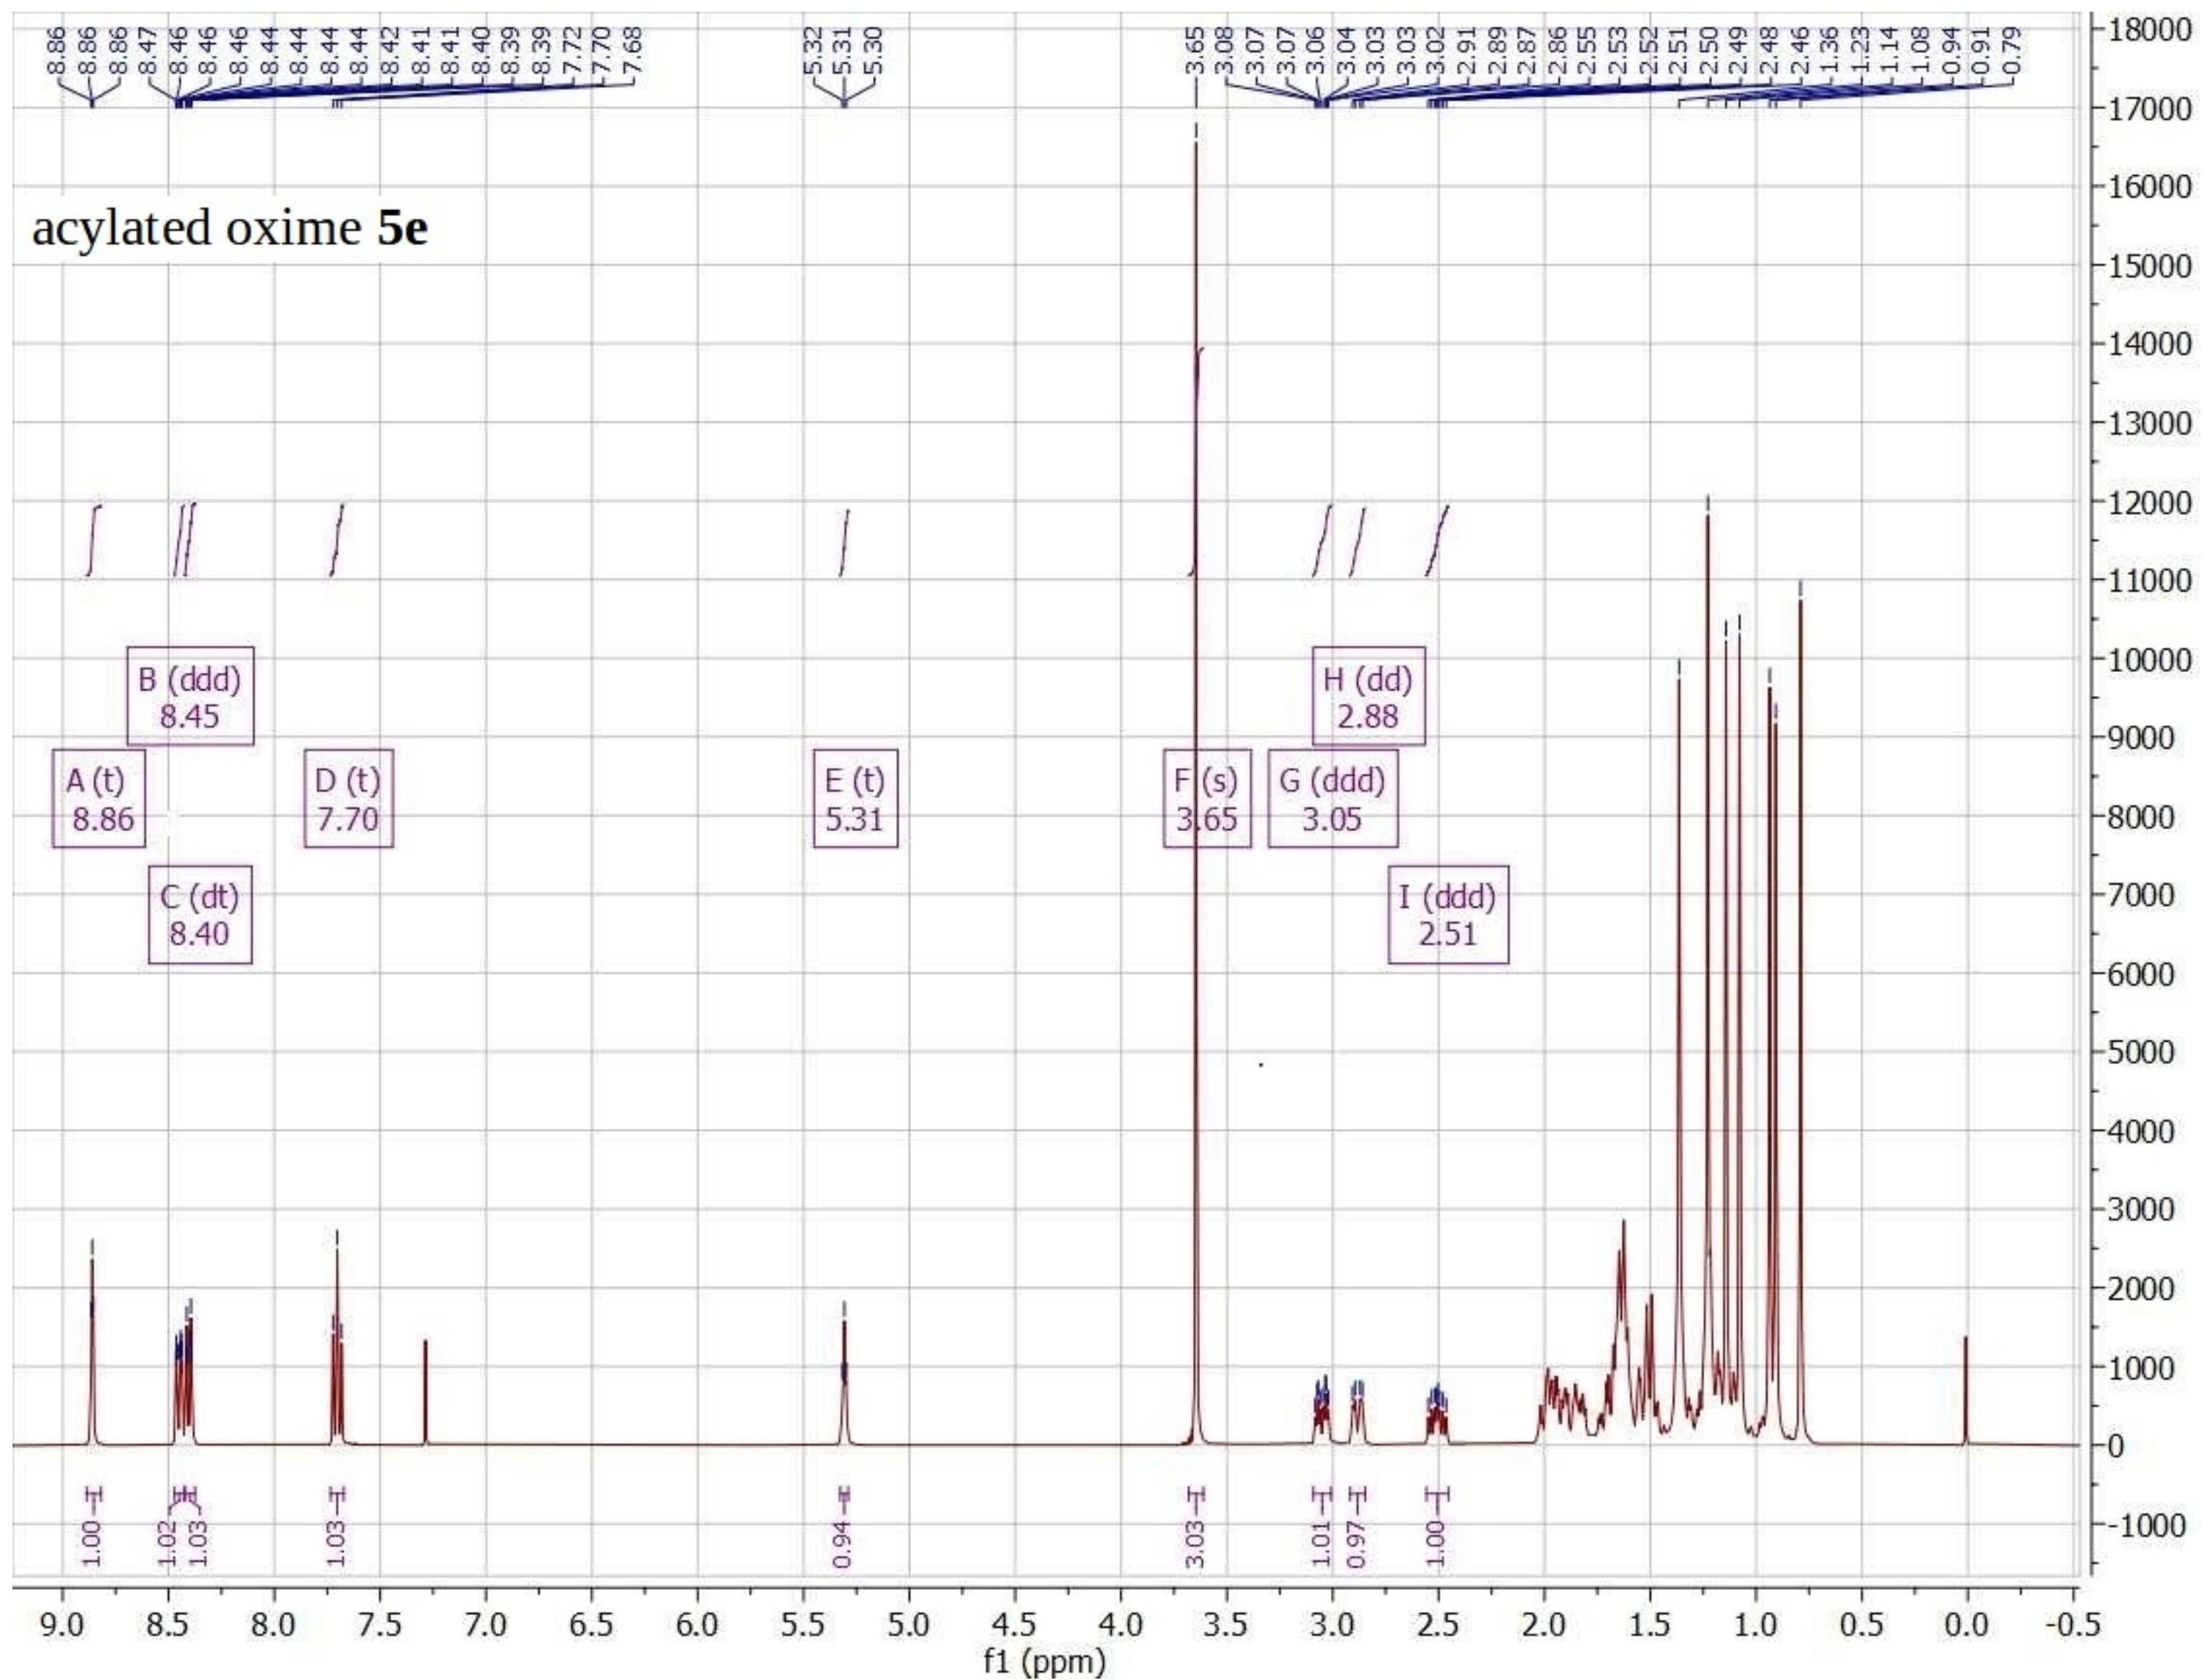



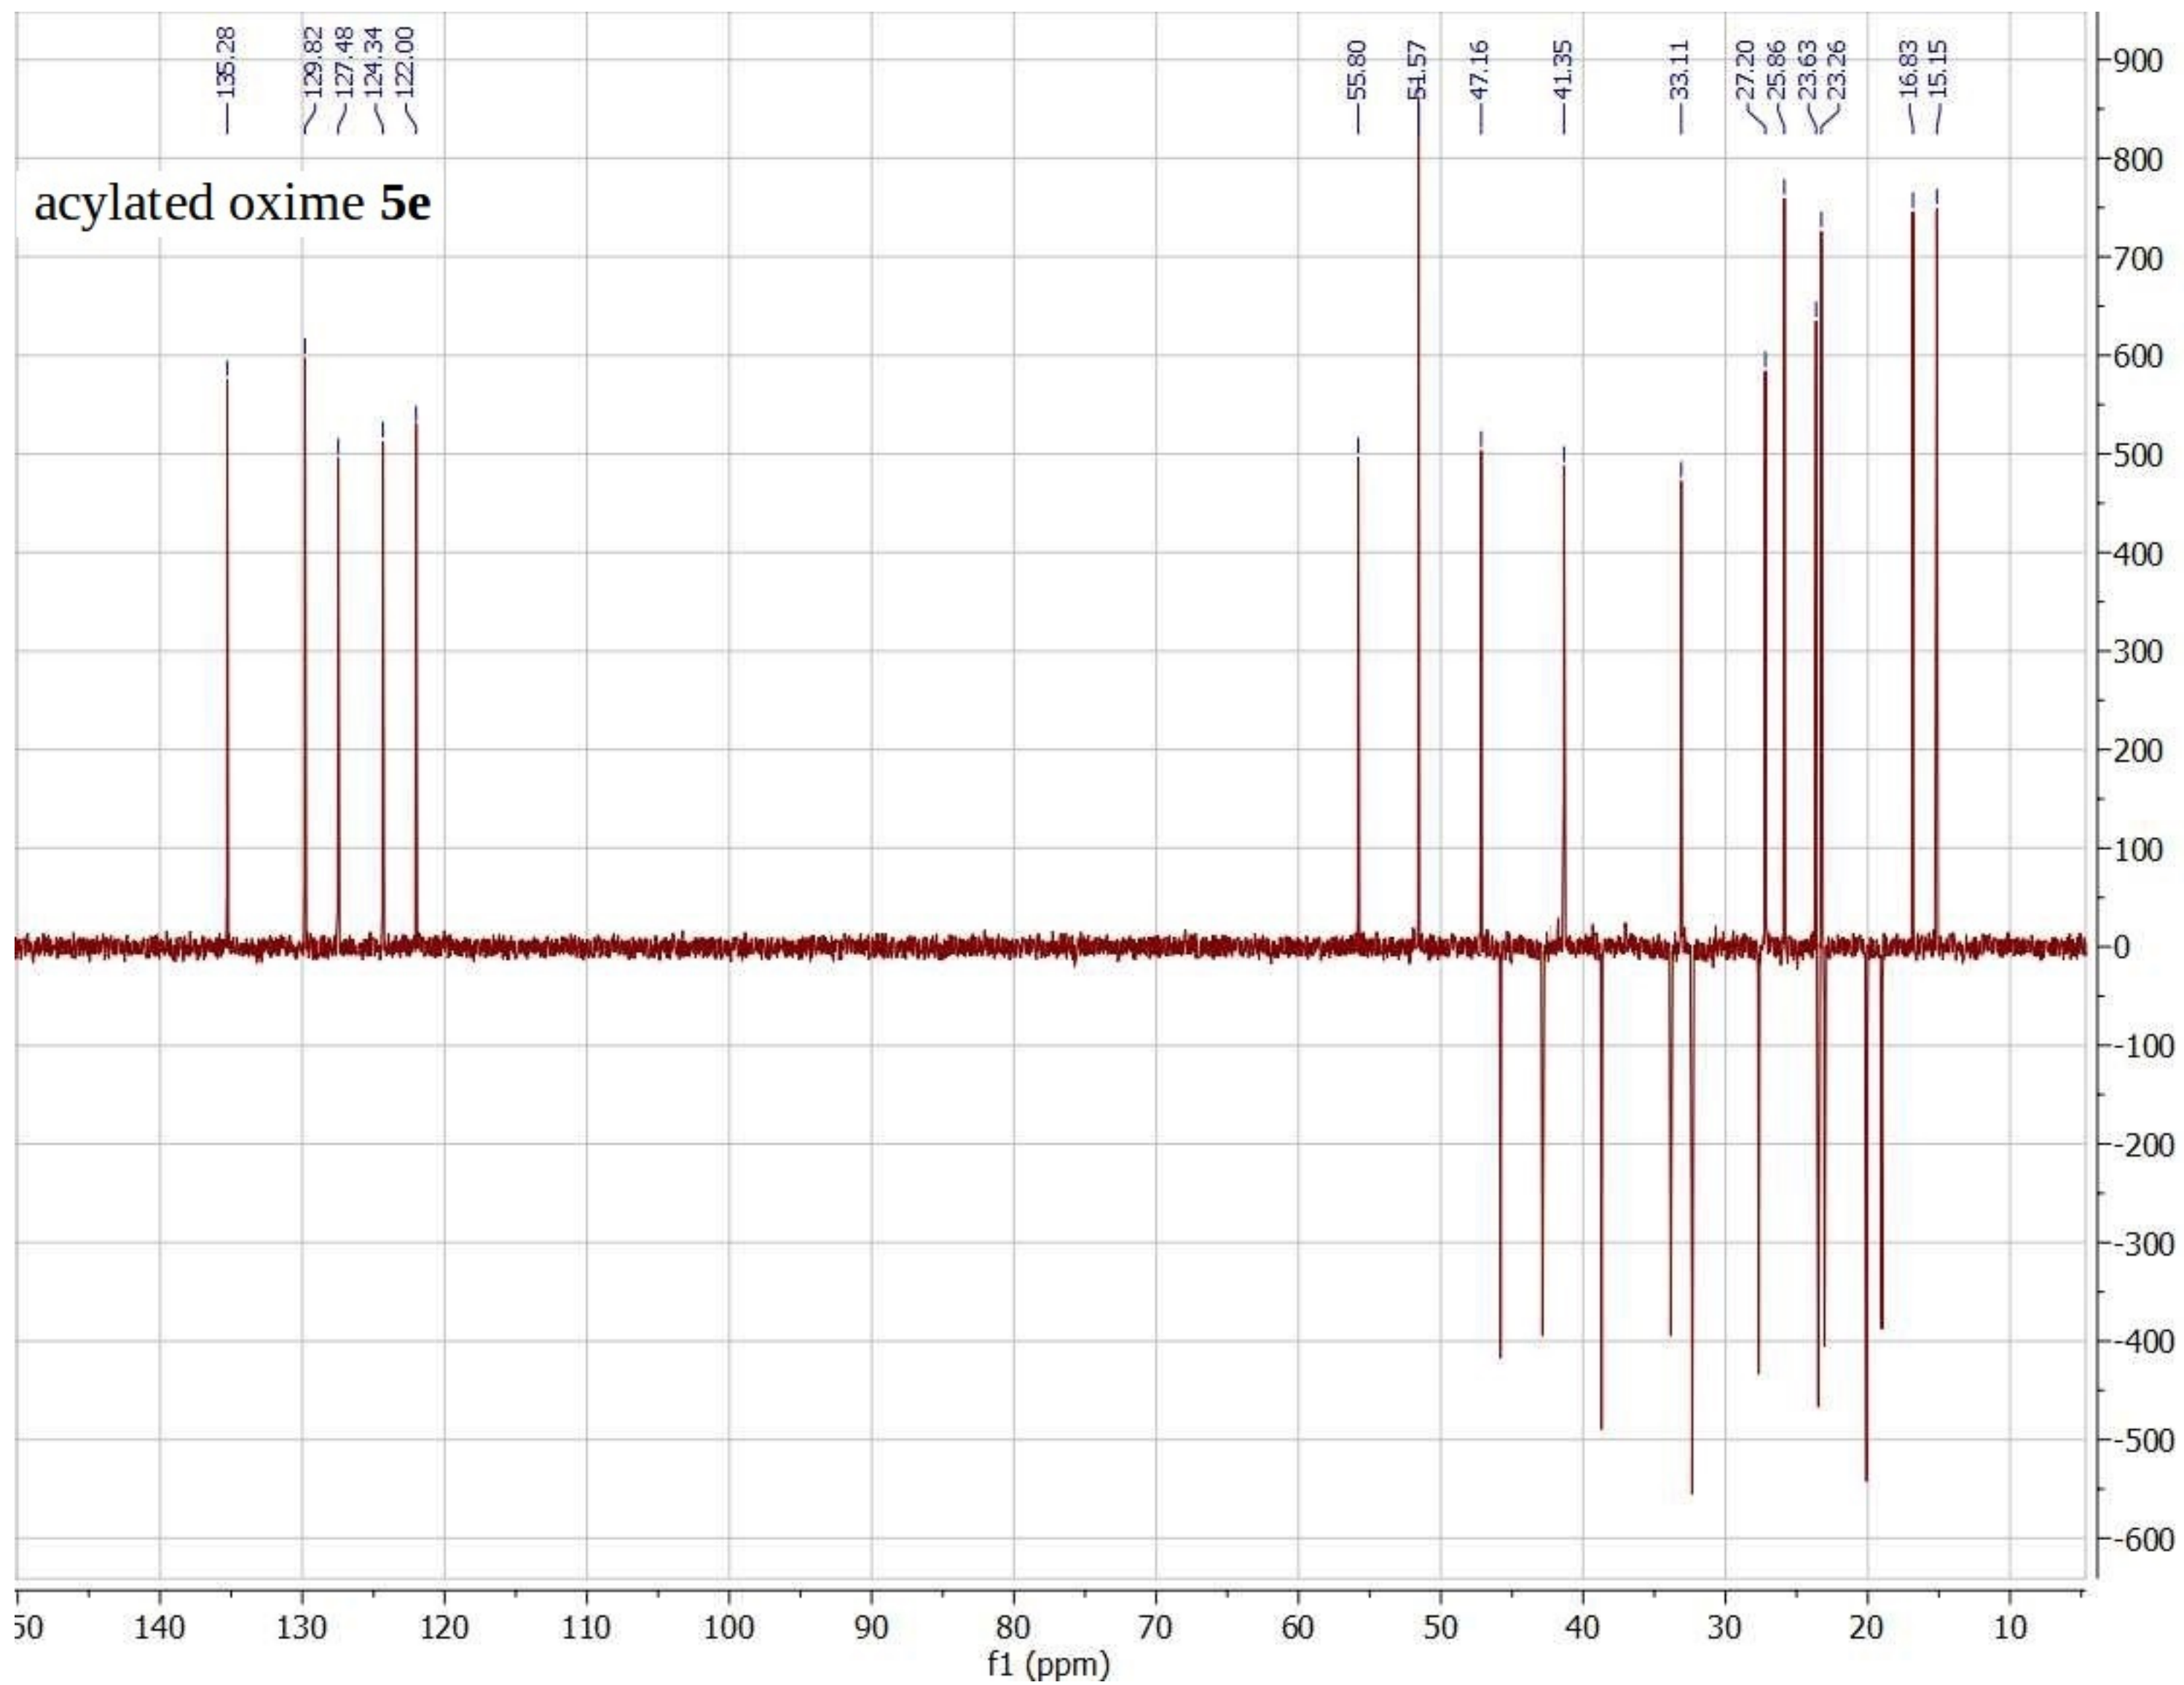

acylated oxime 5e

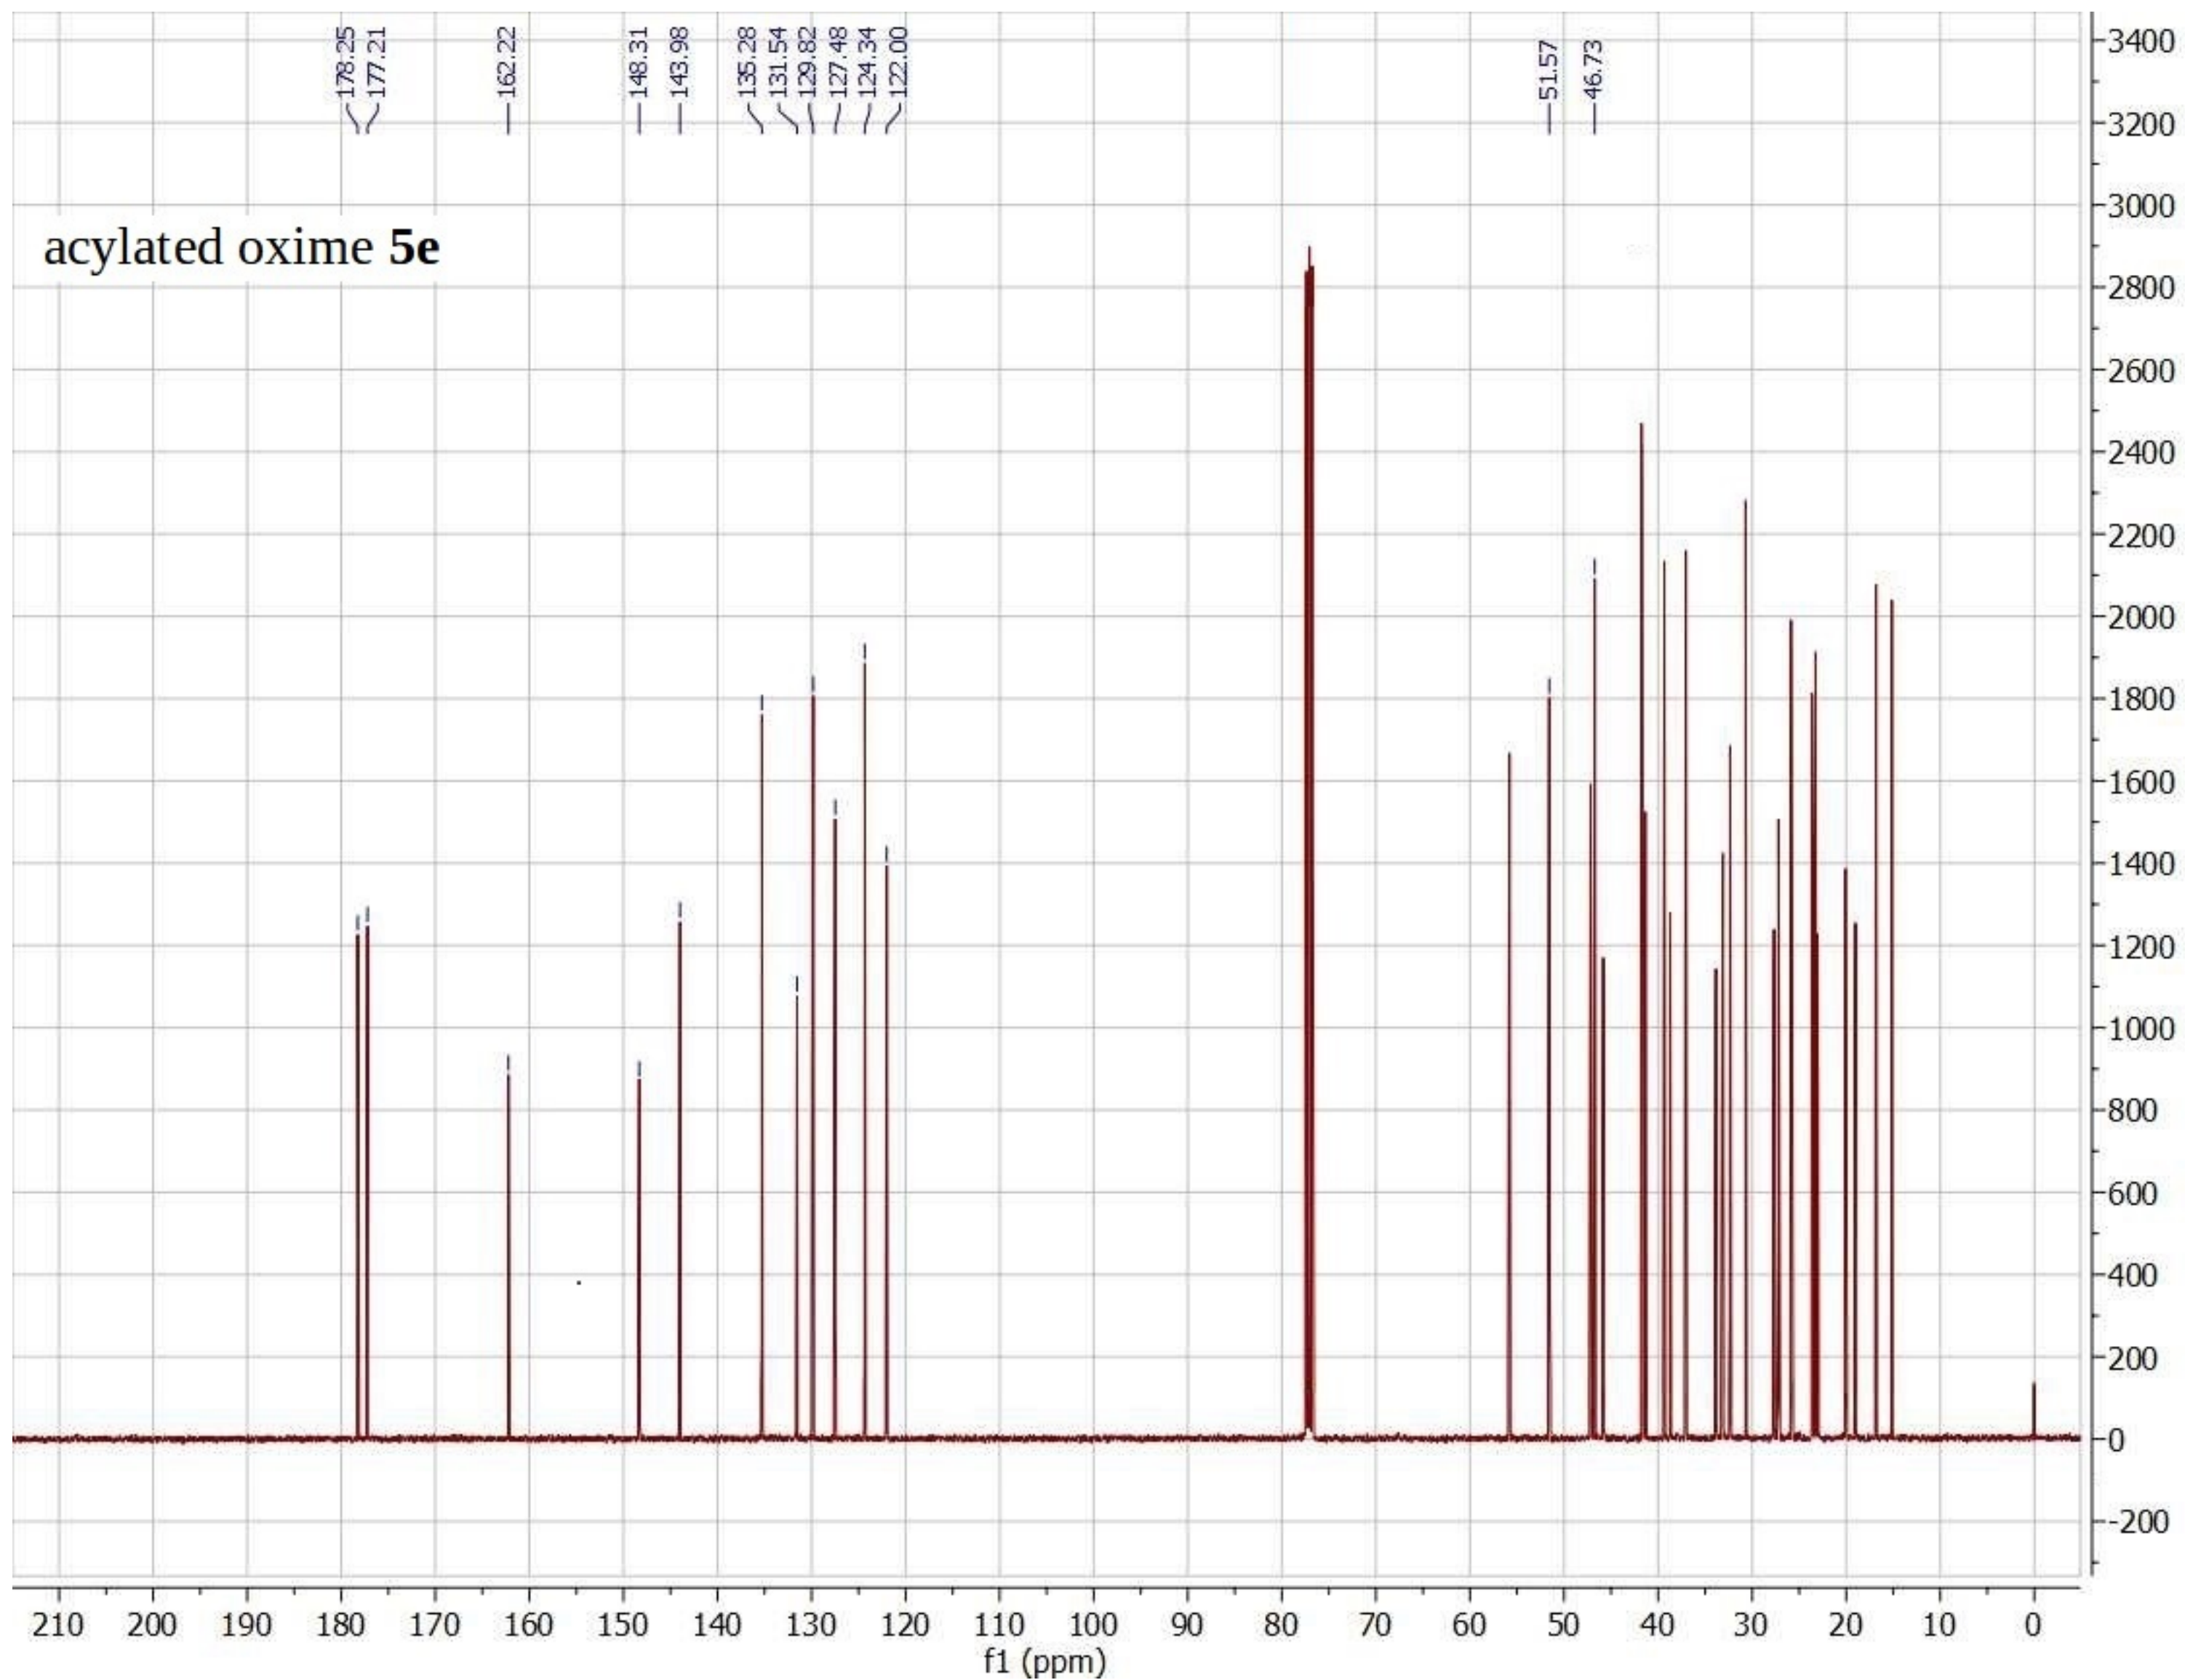

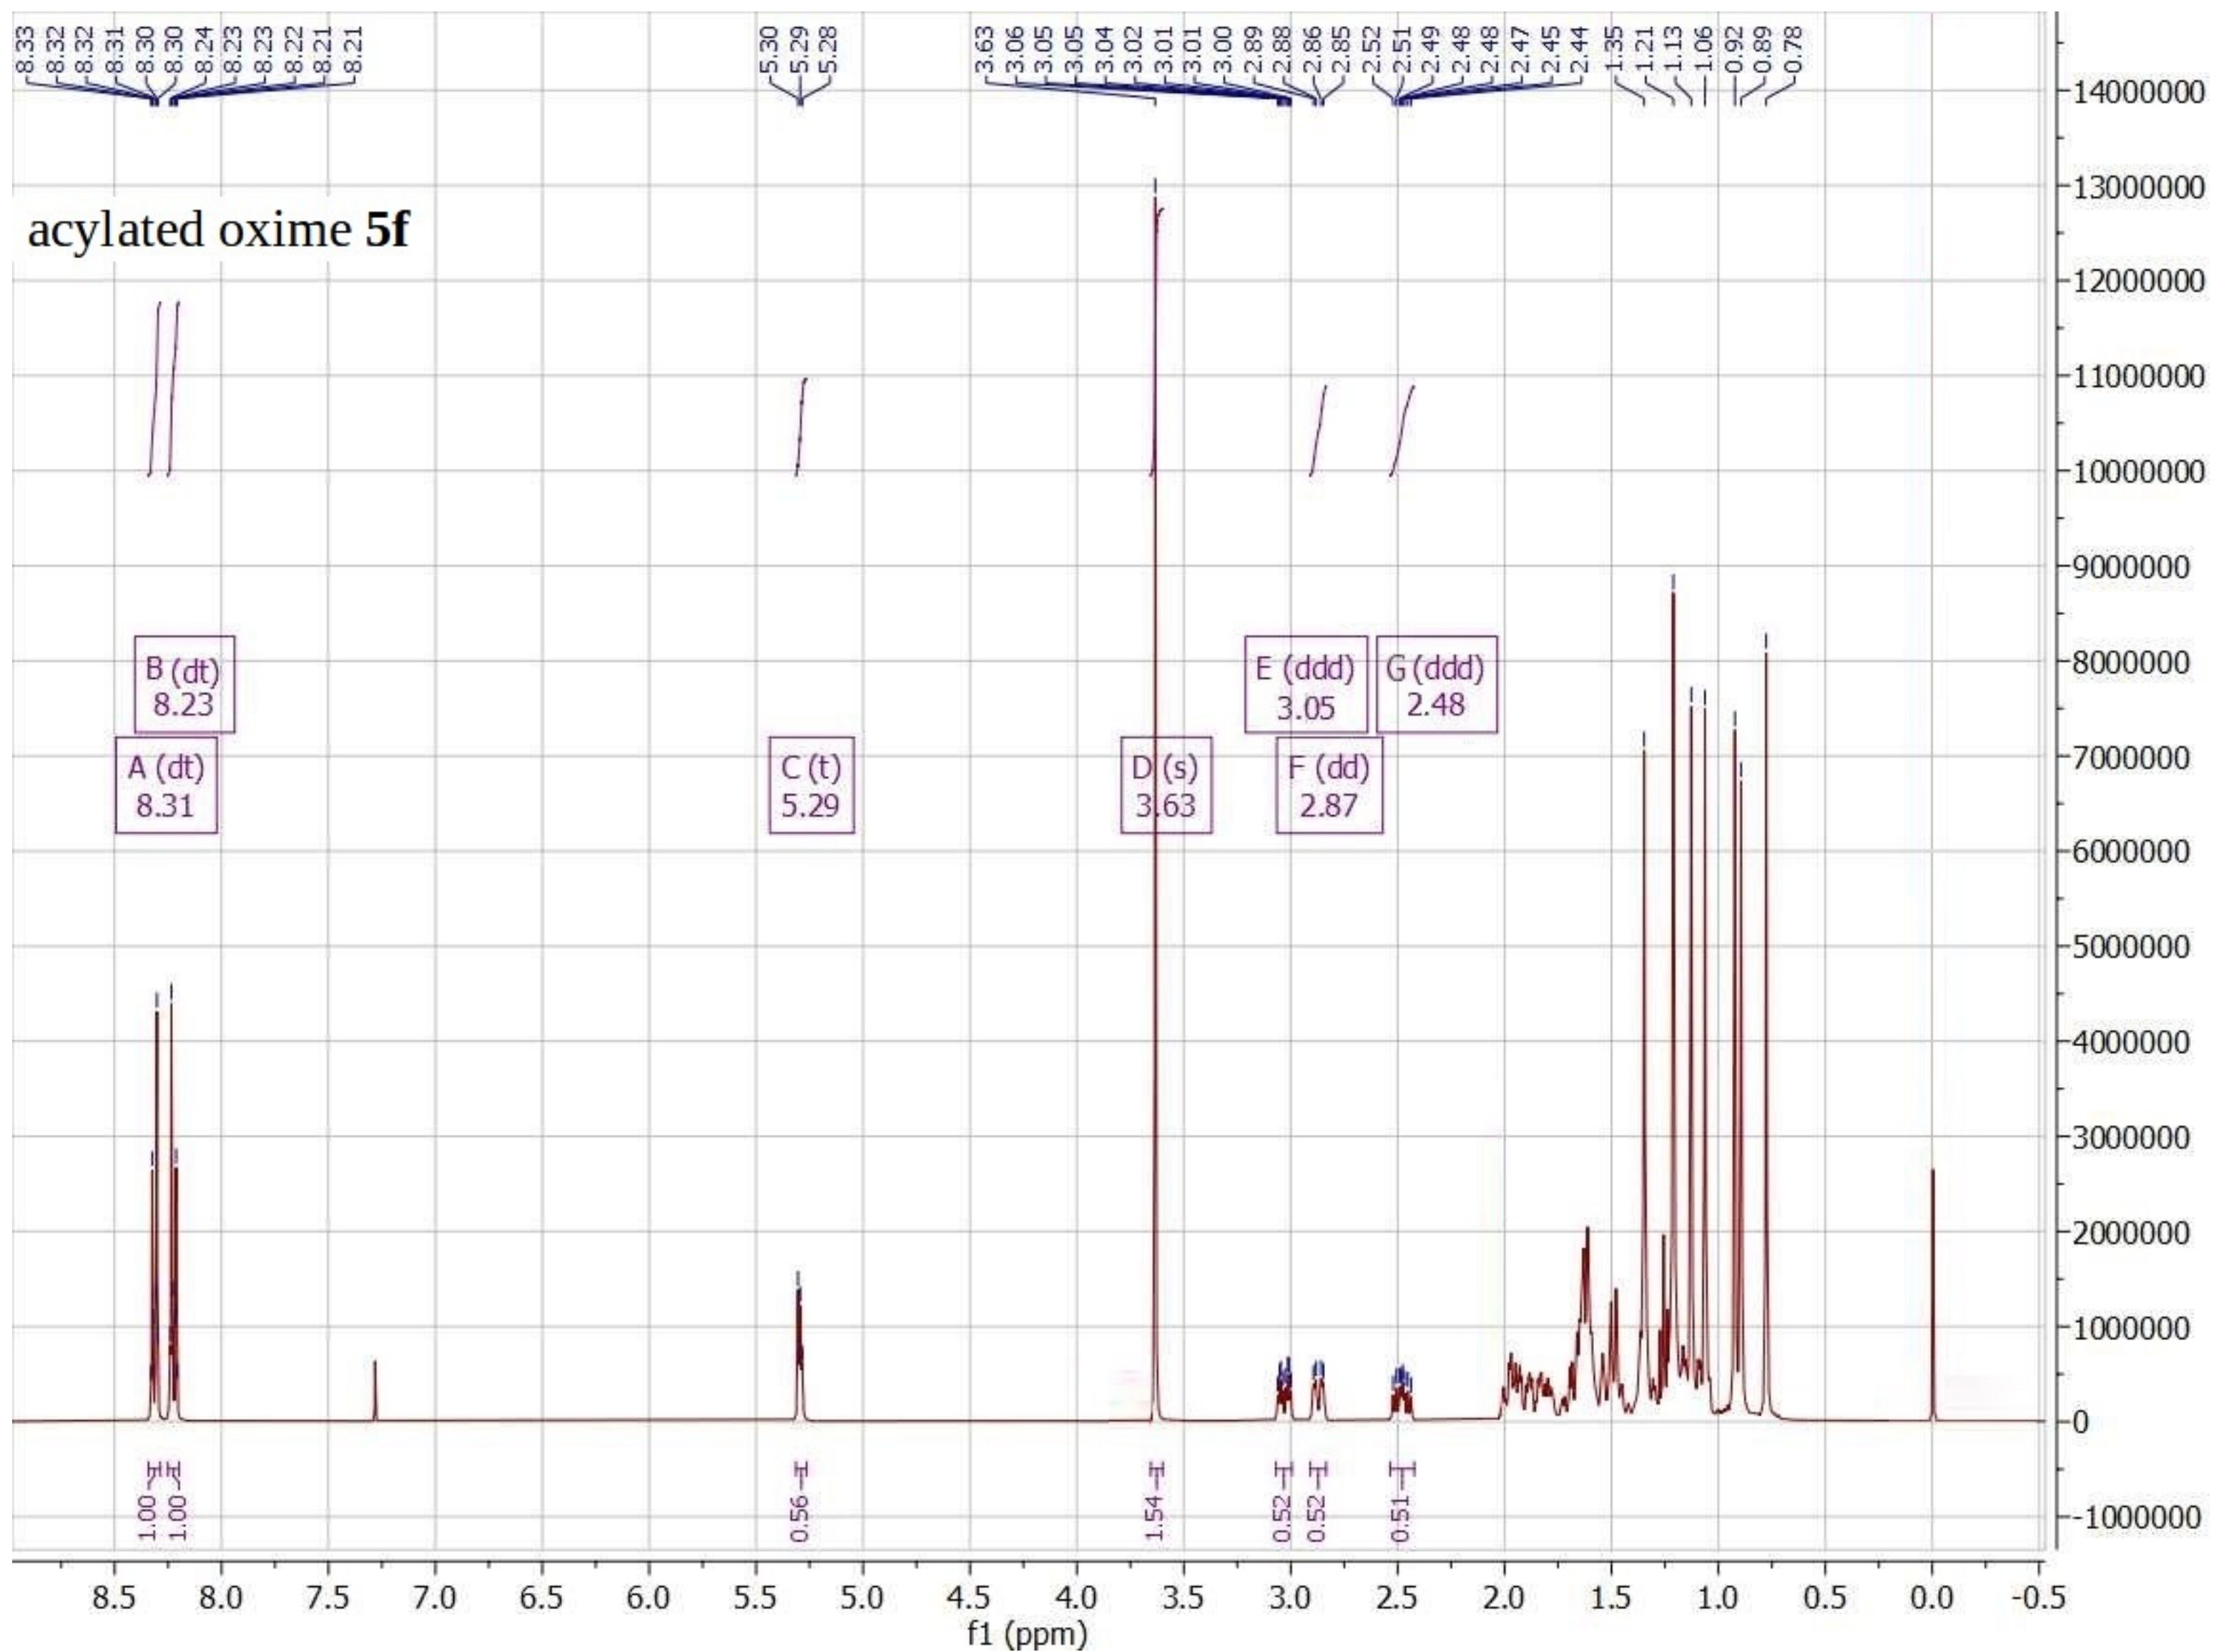



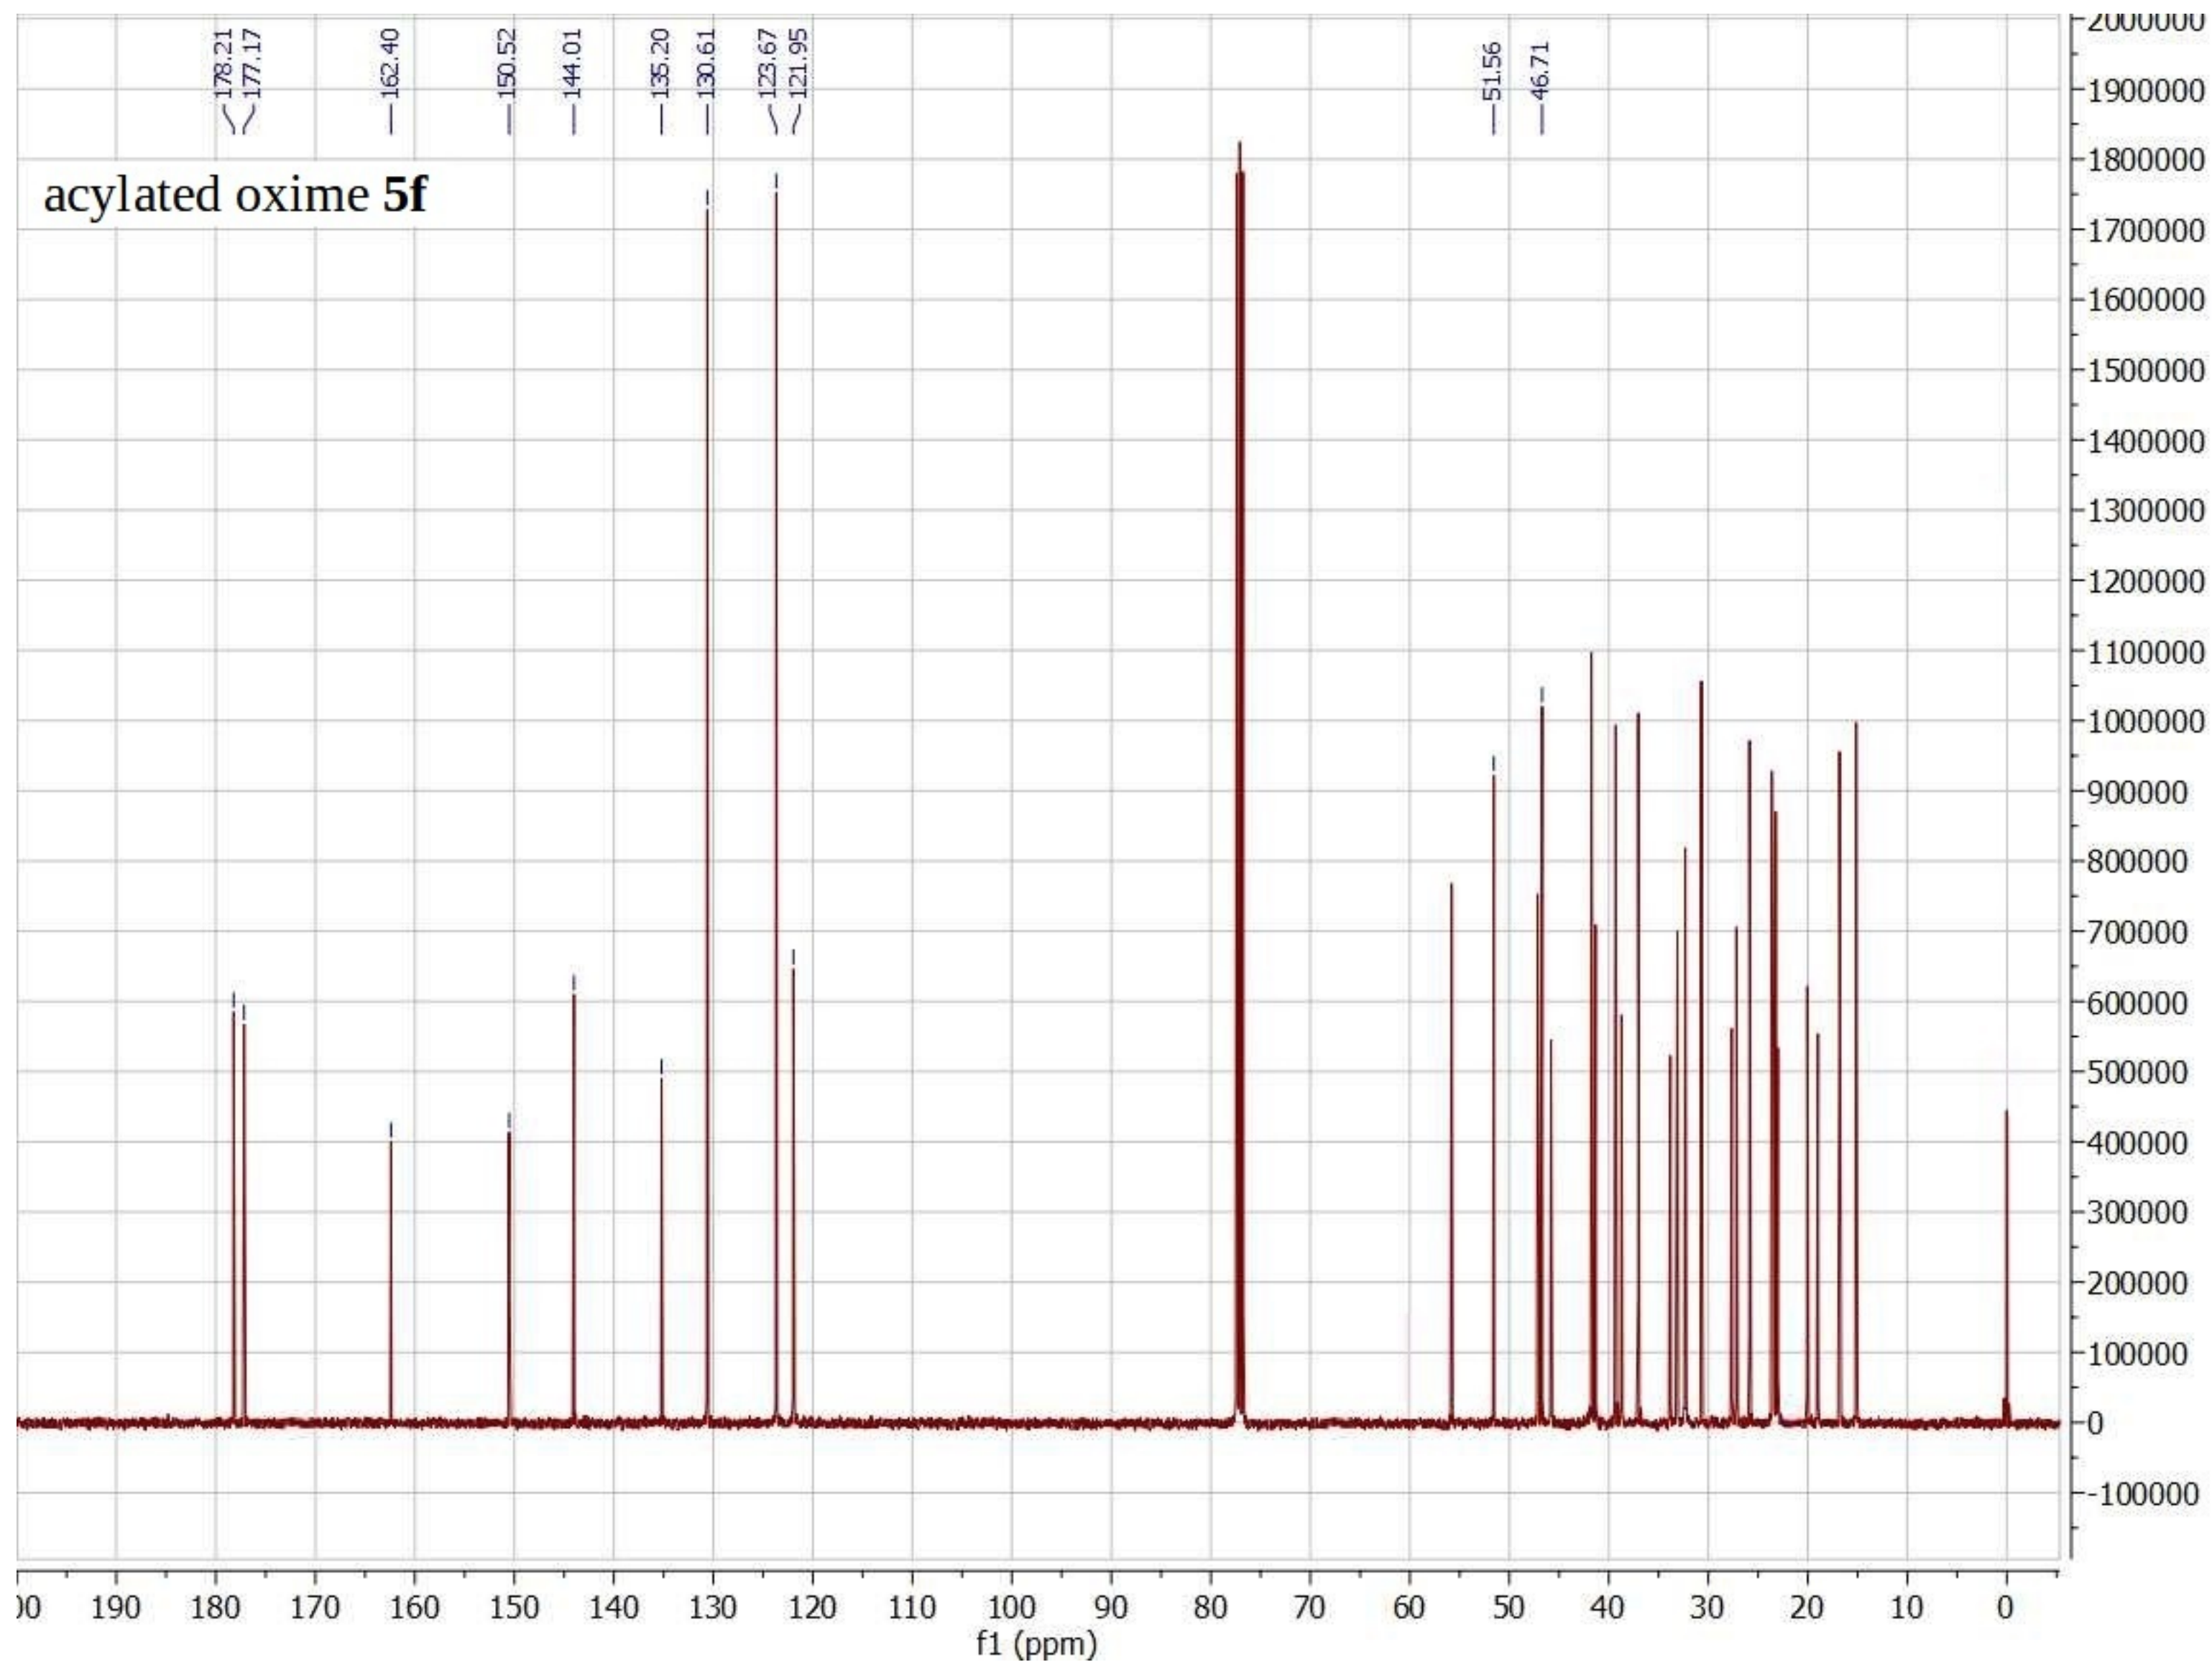

acylated oxime 5g

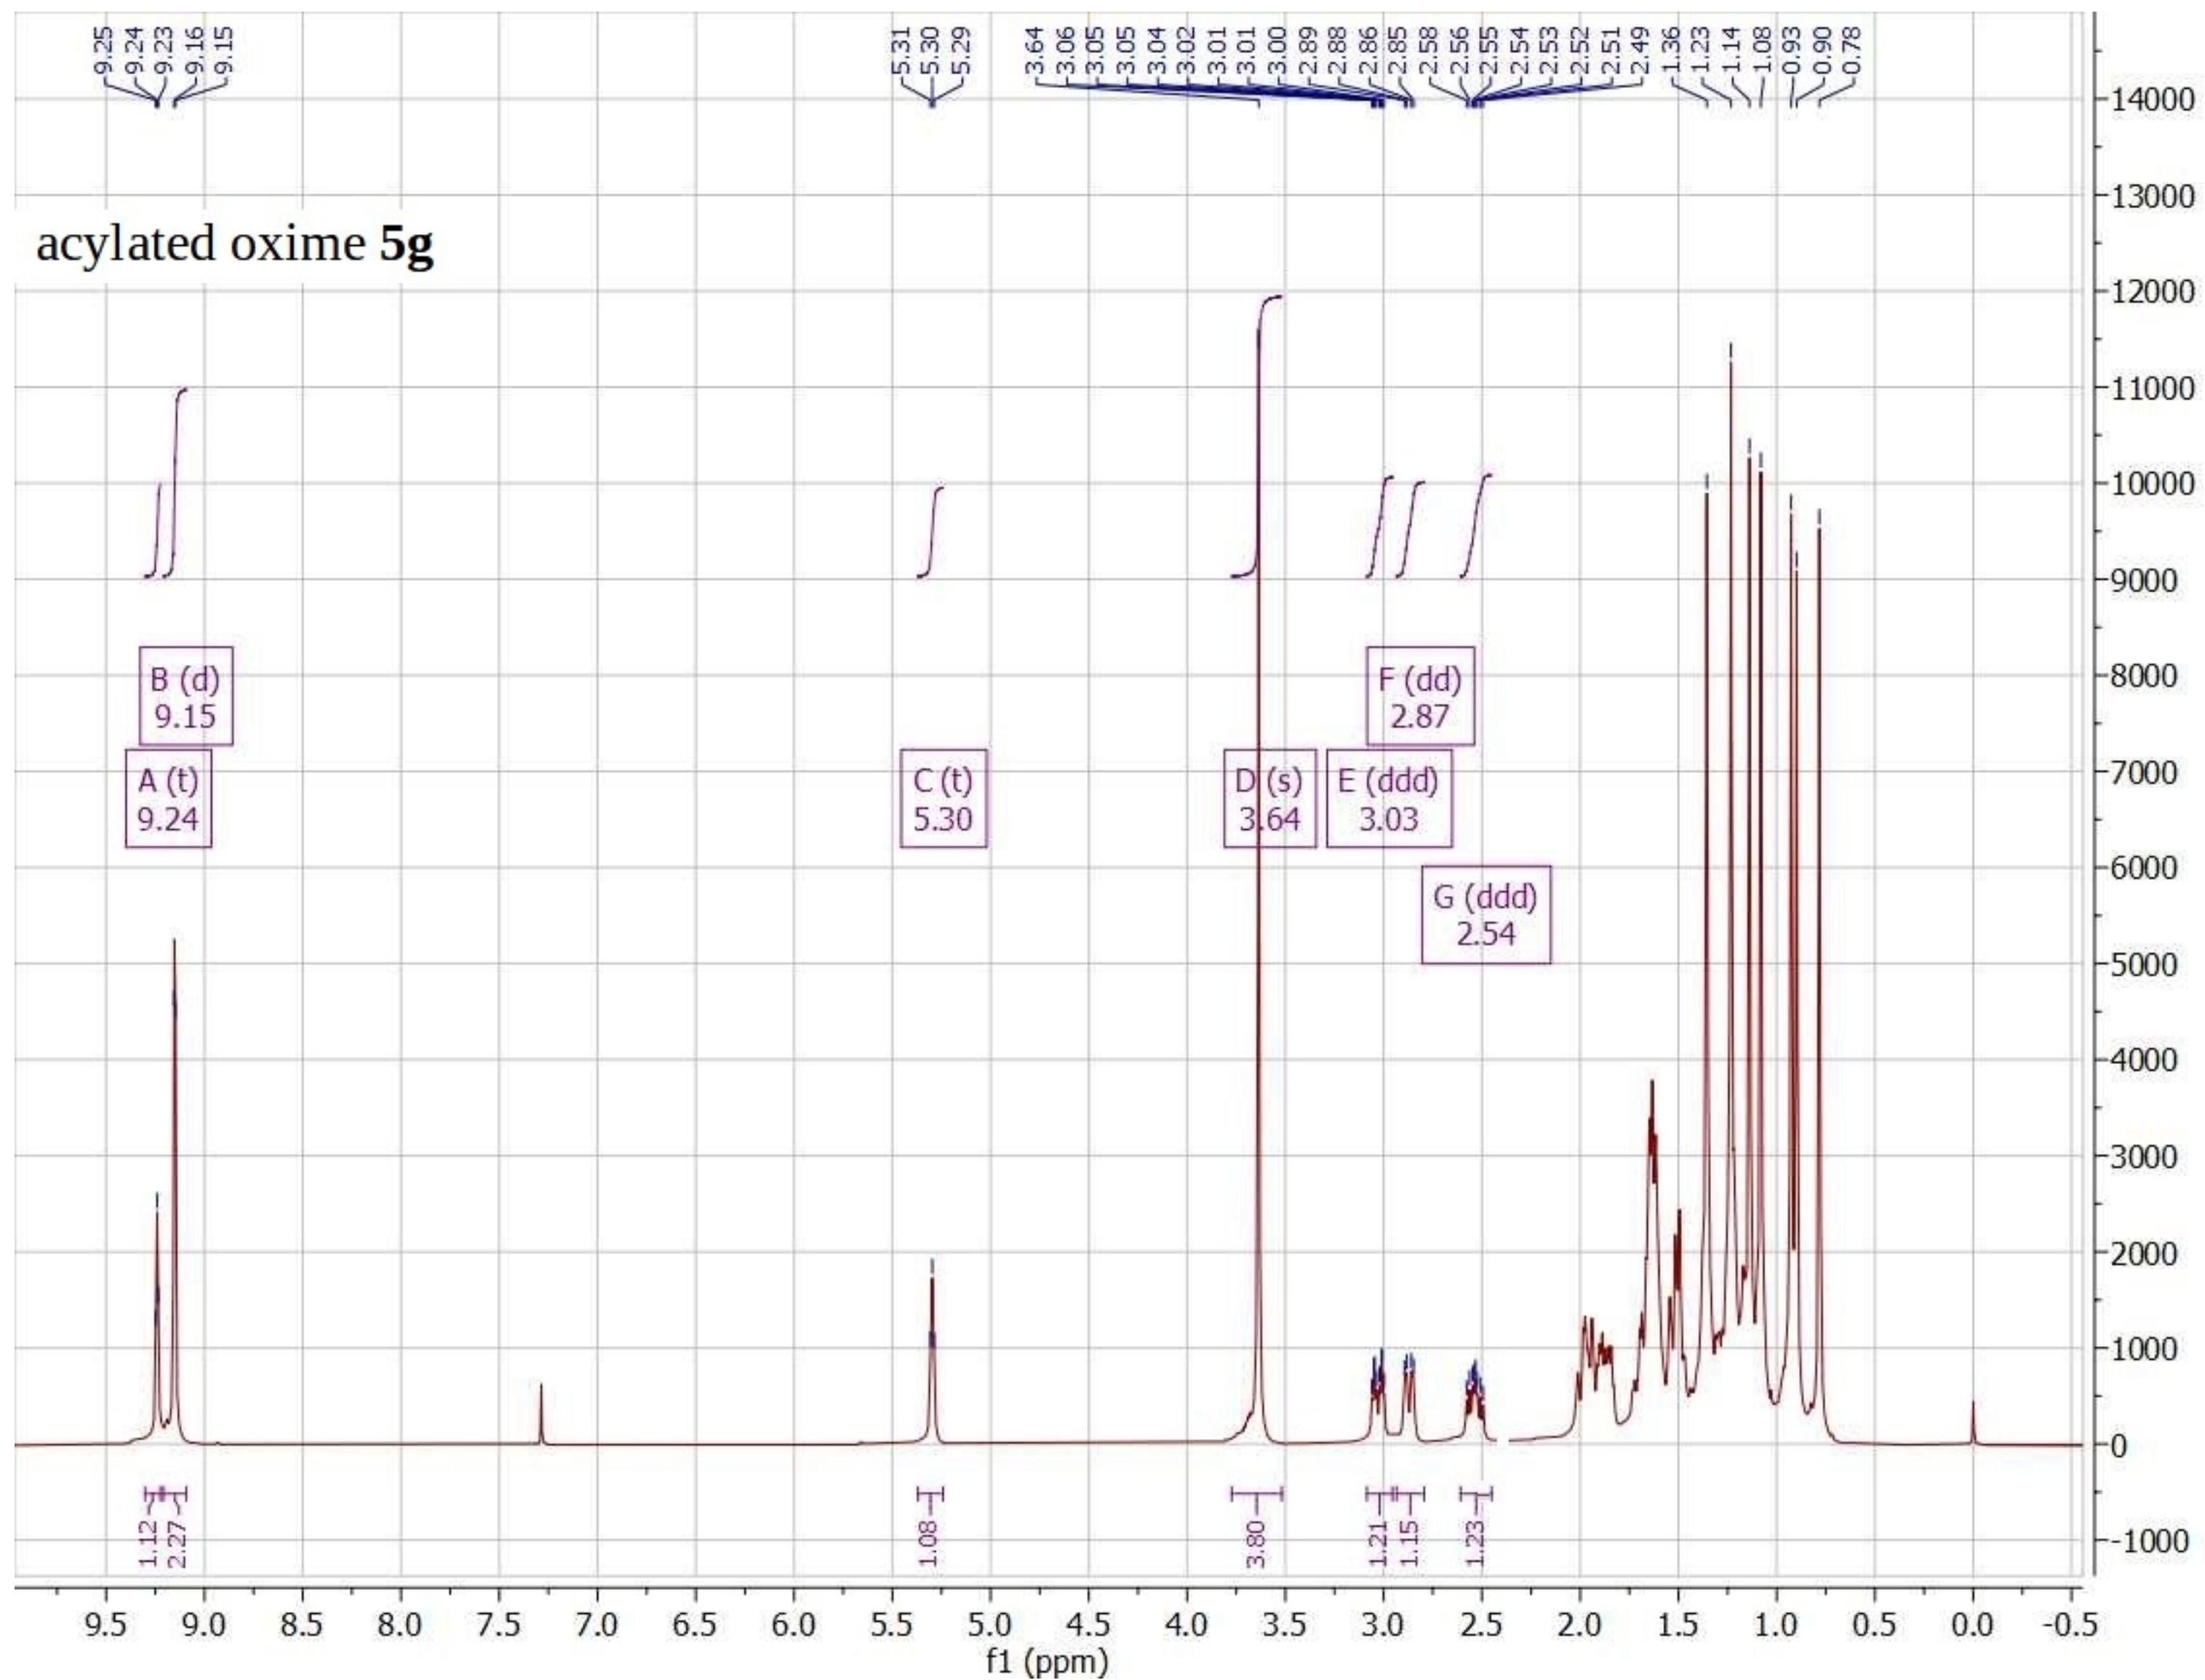

acylated oxime 5g

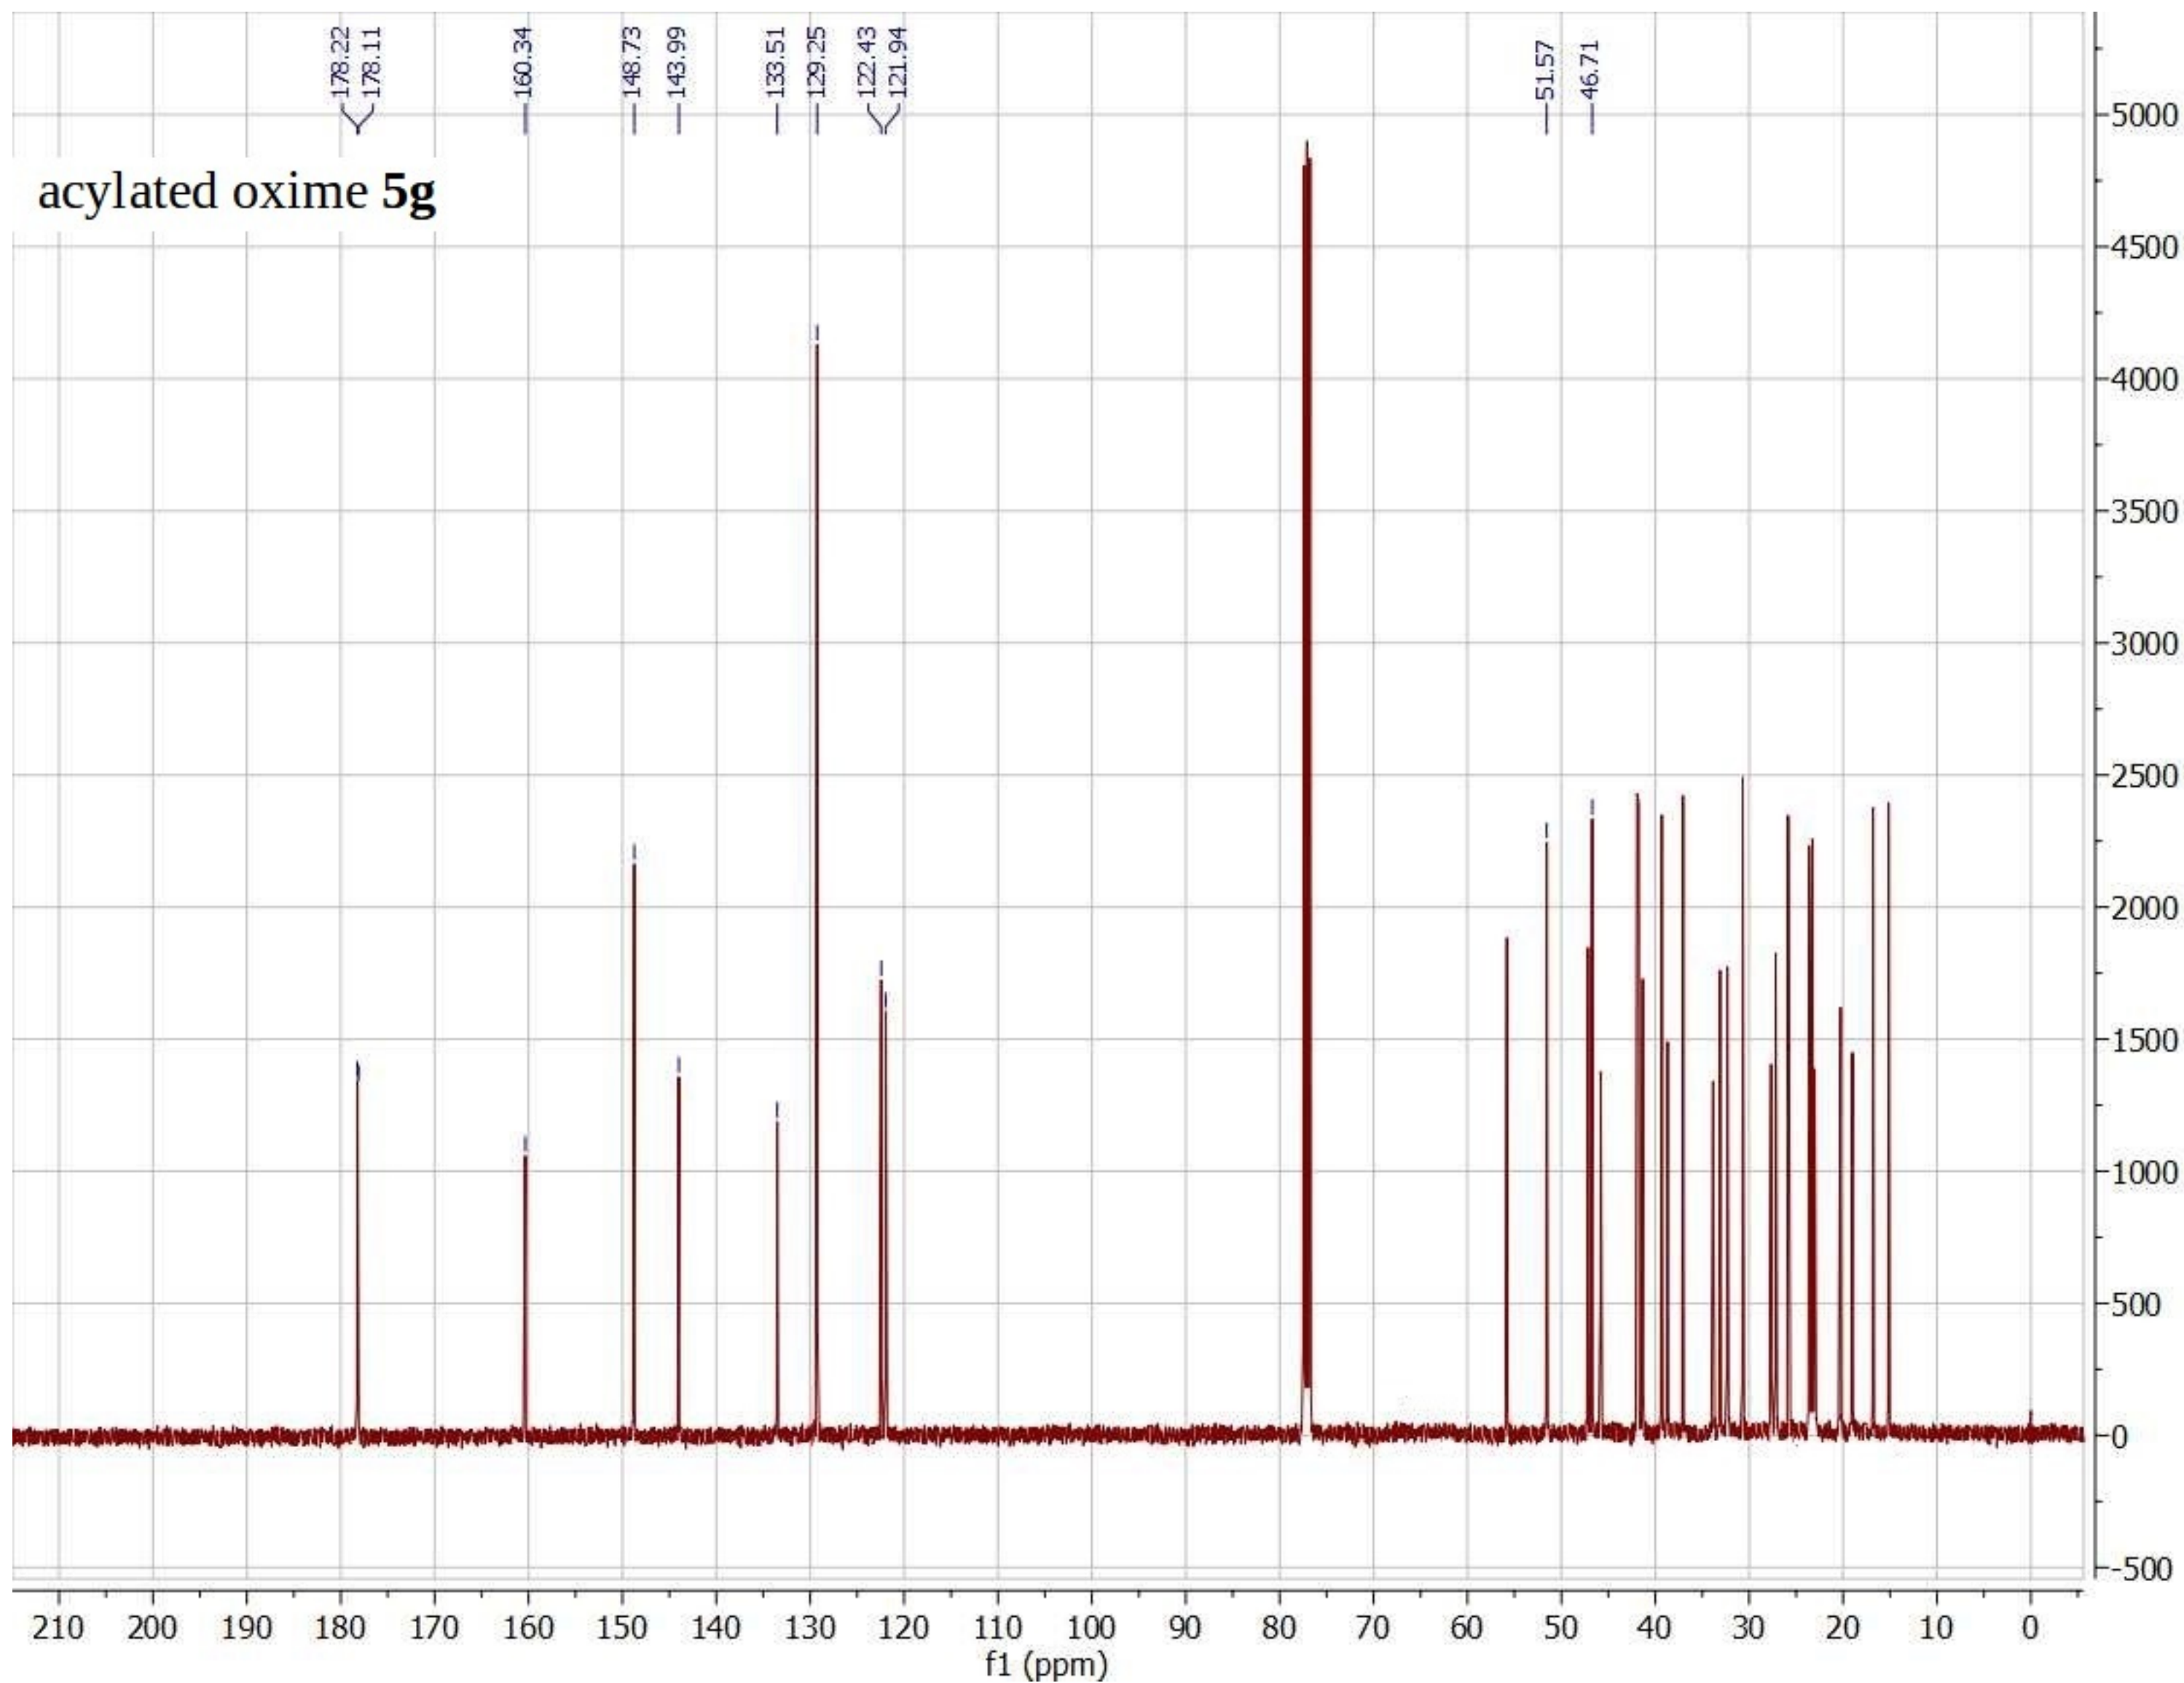



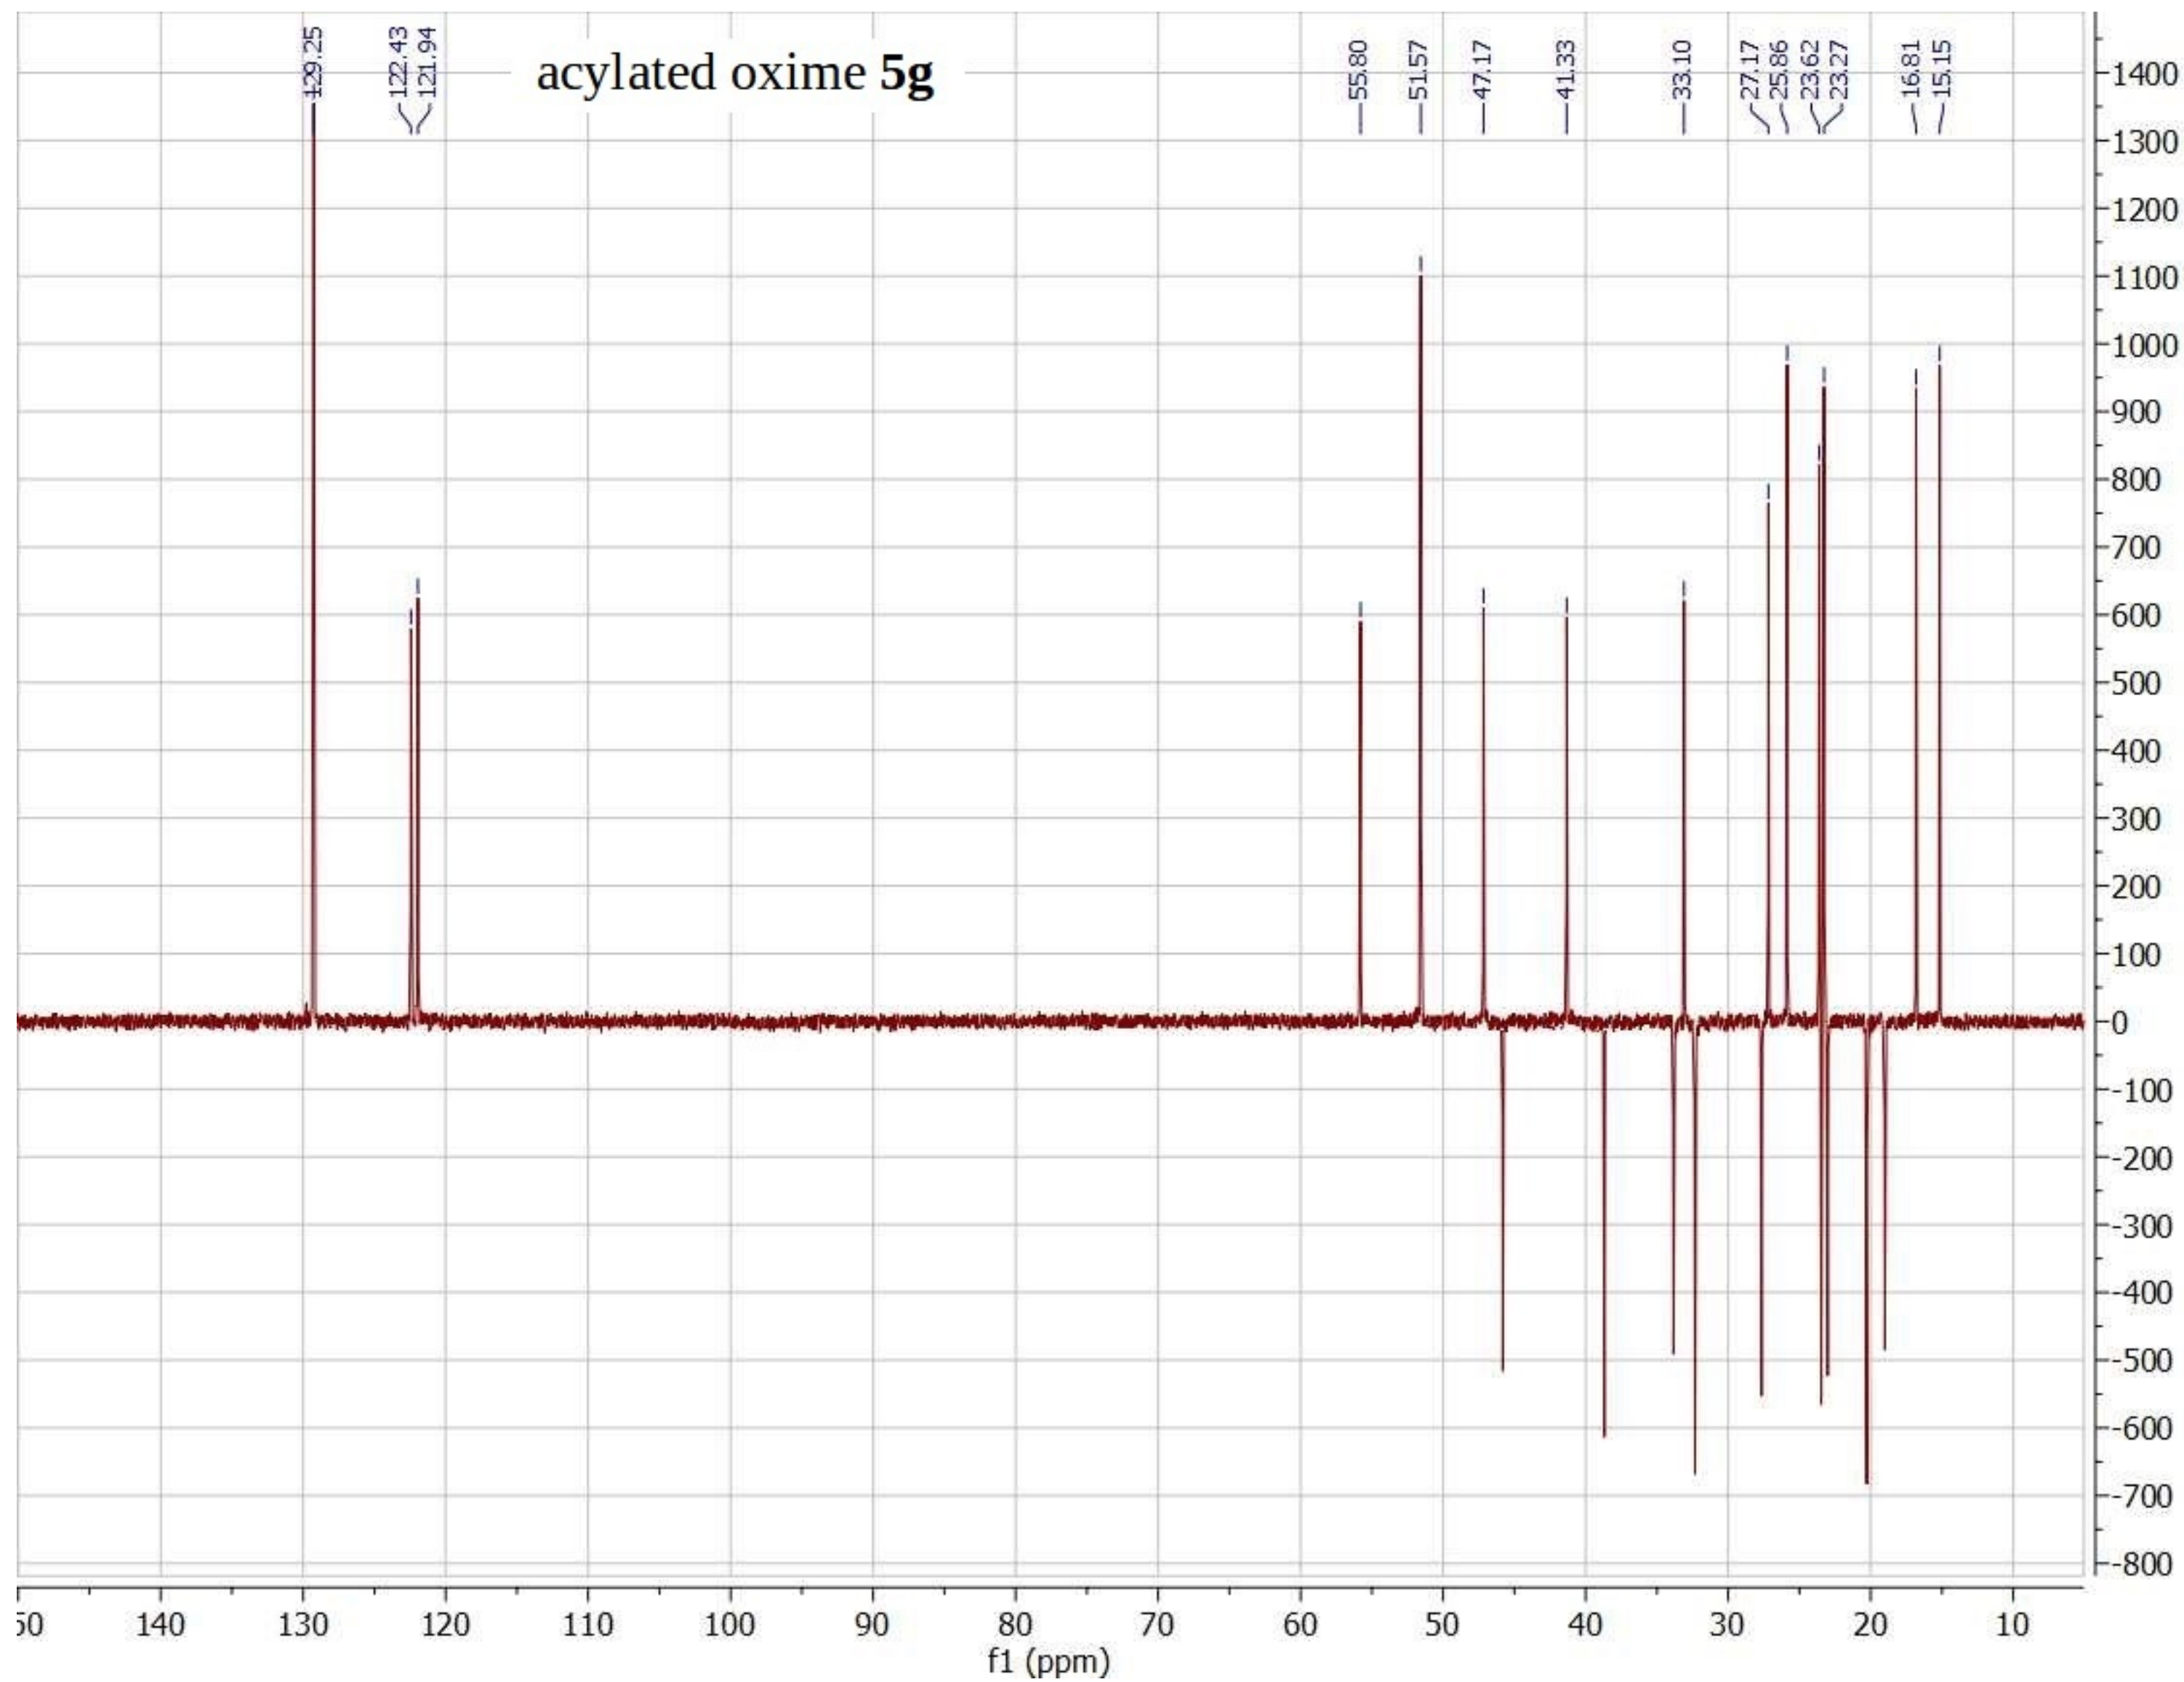

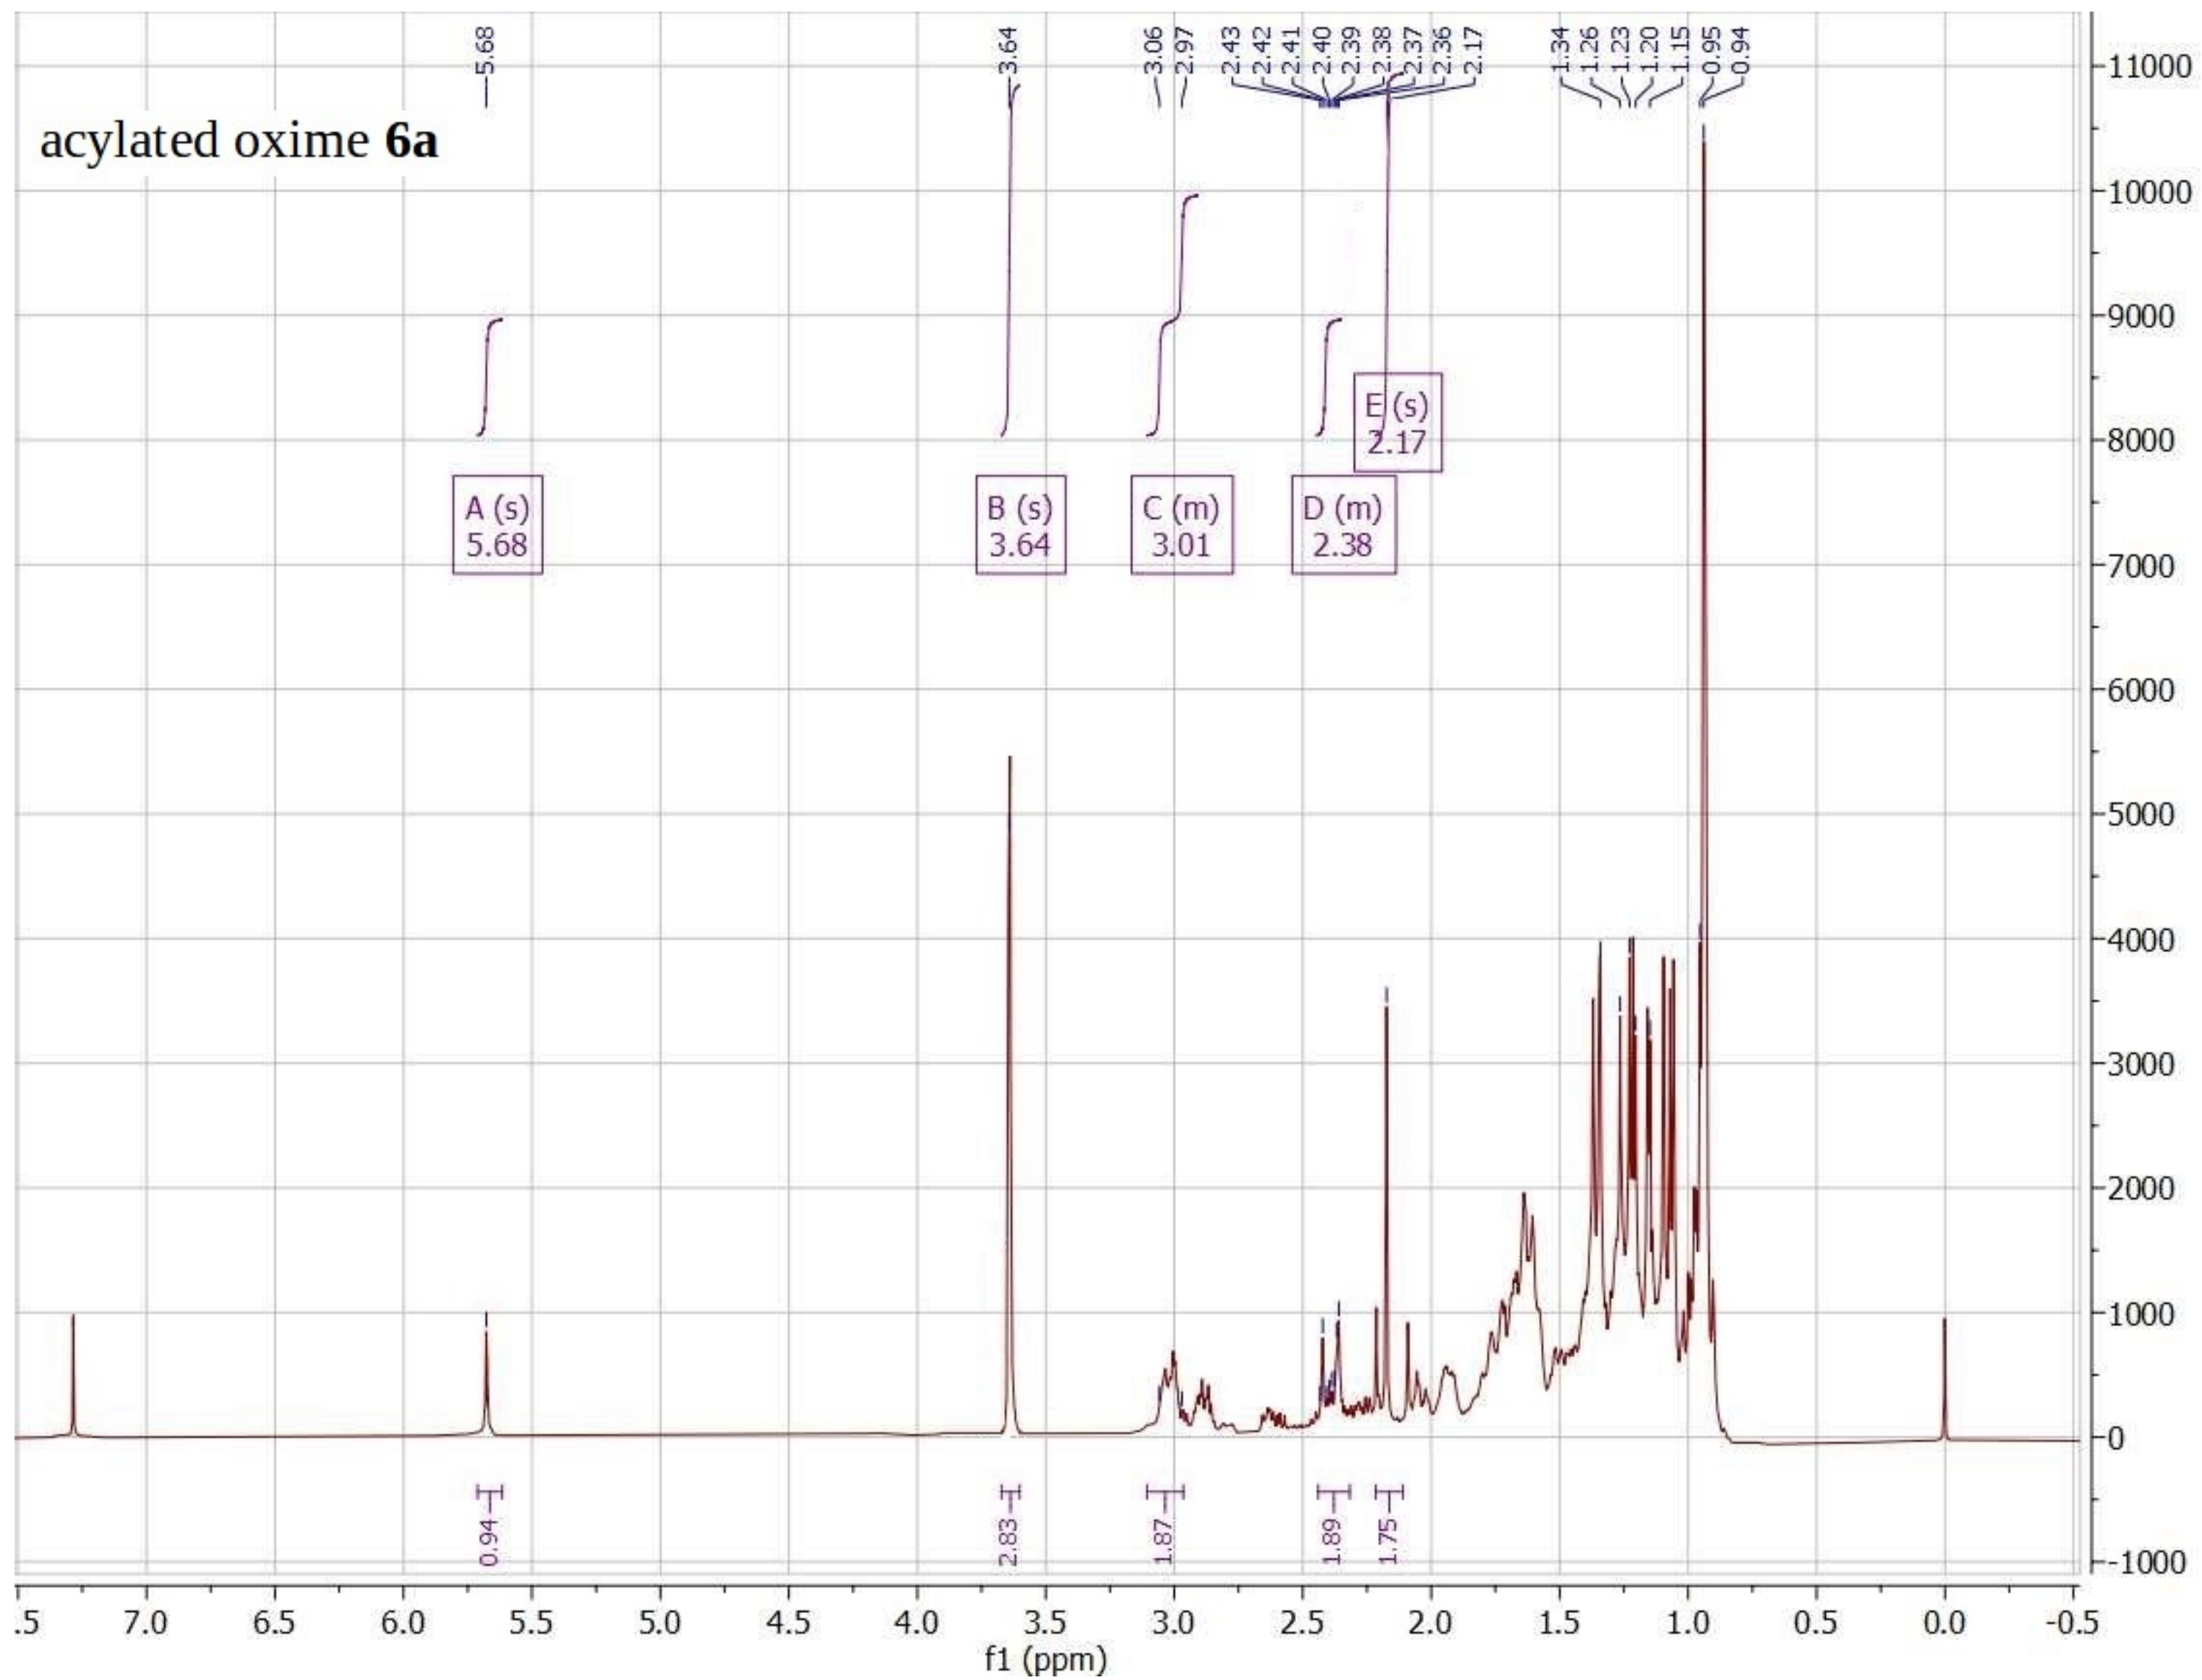

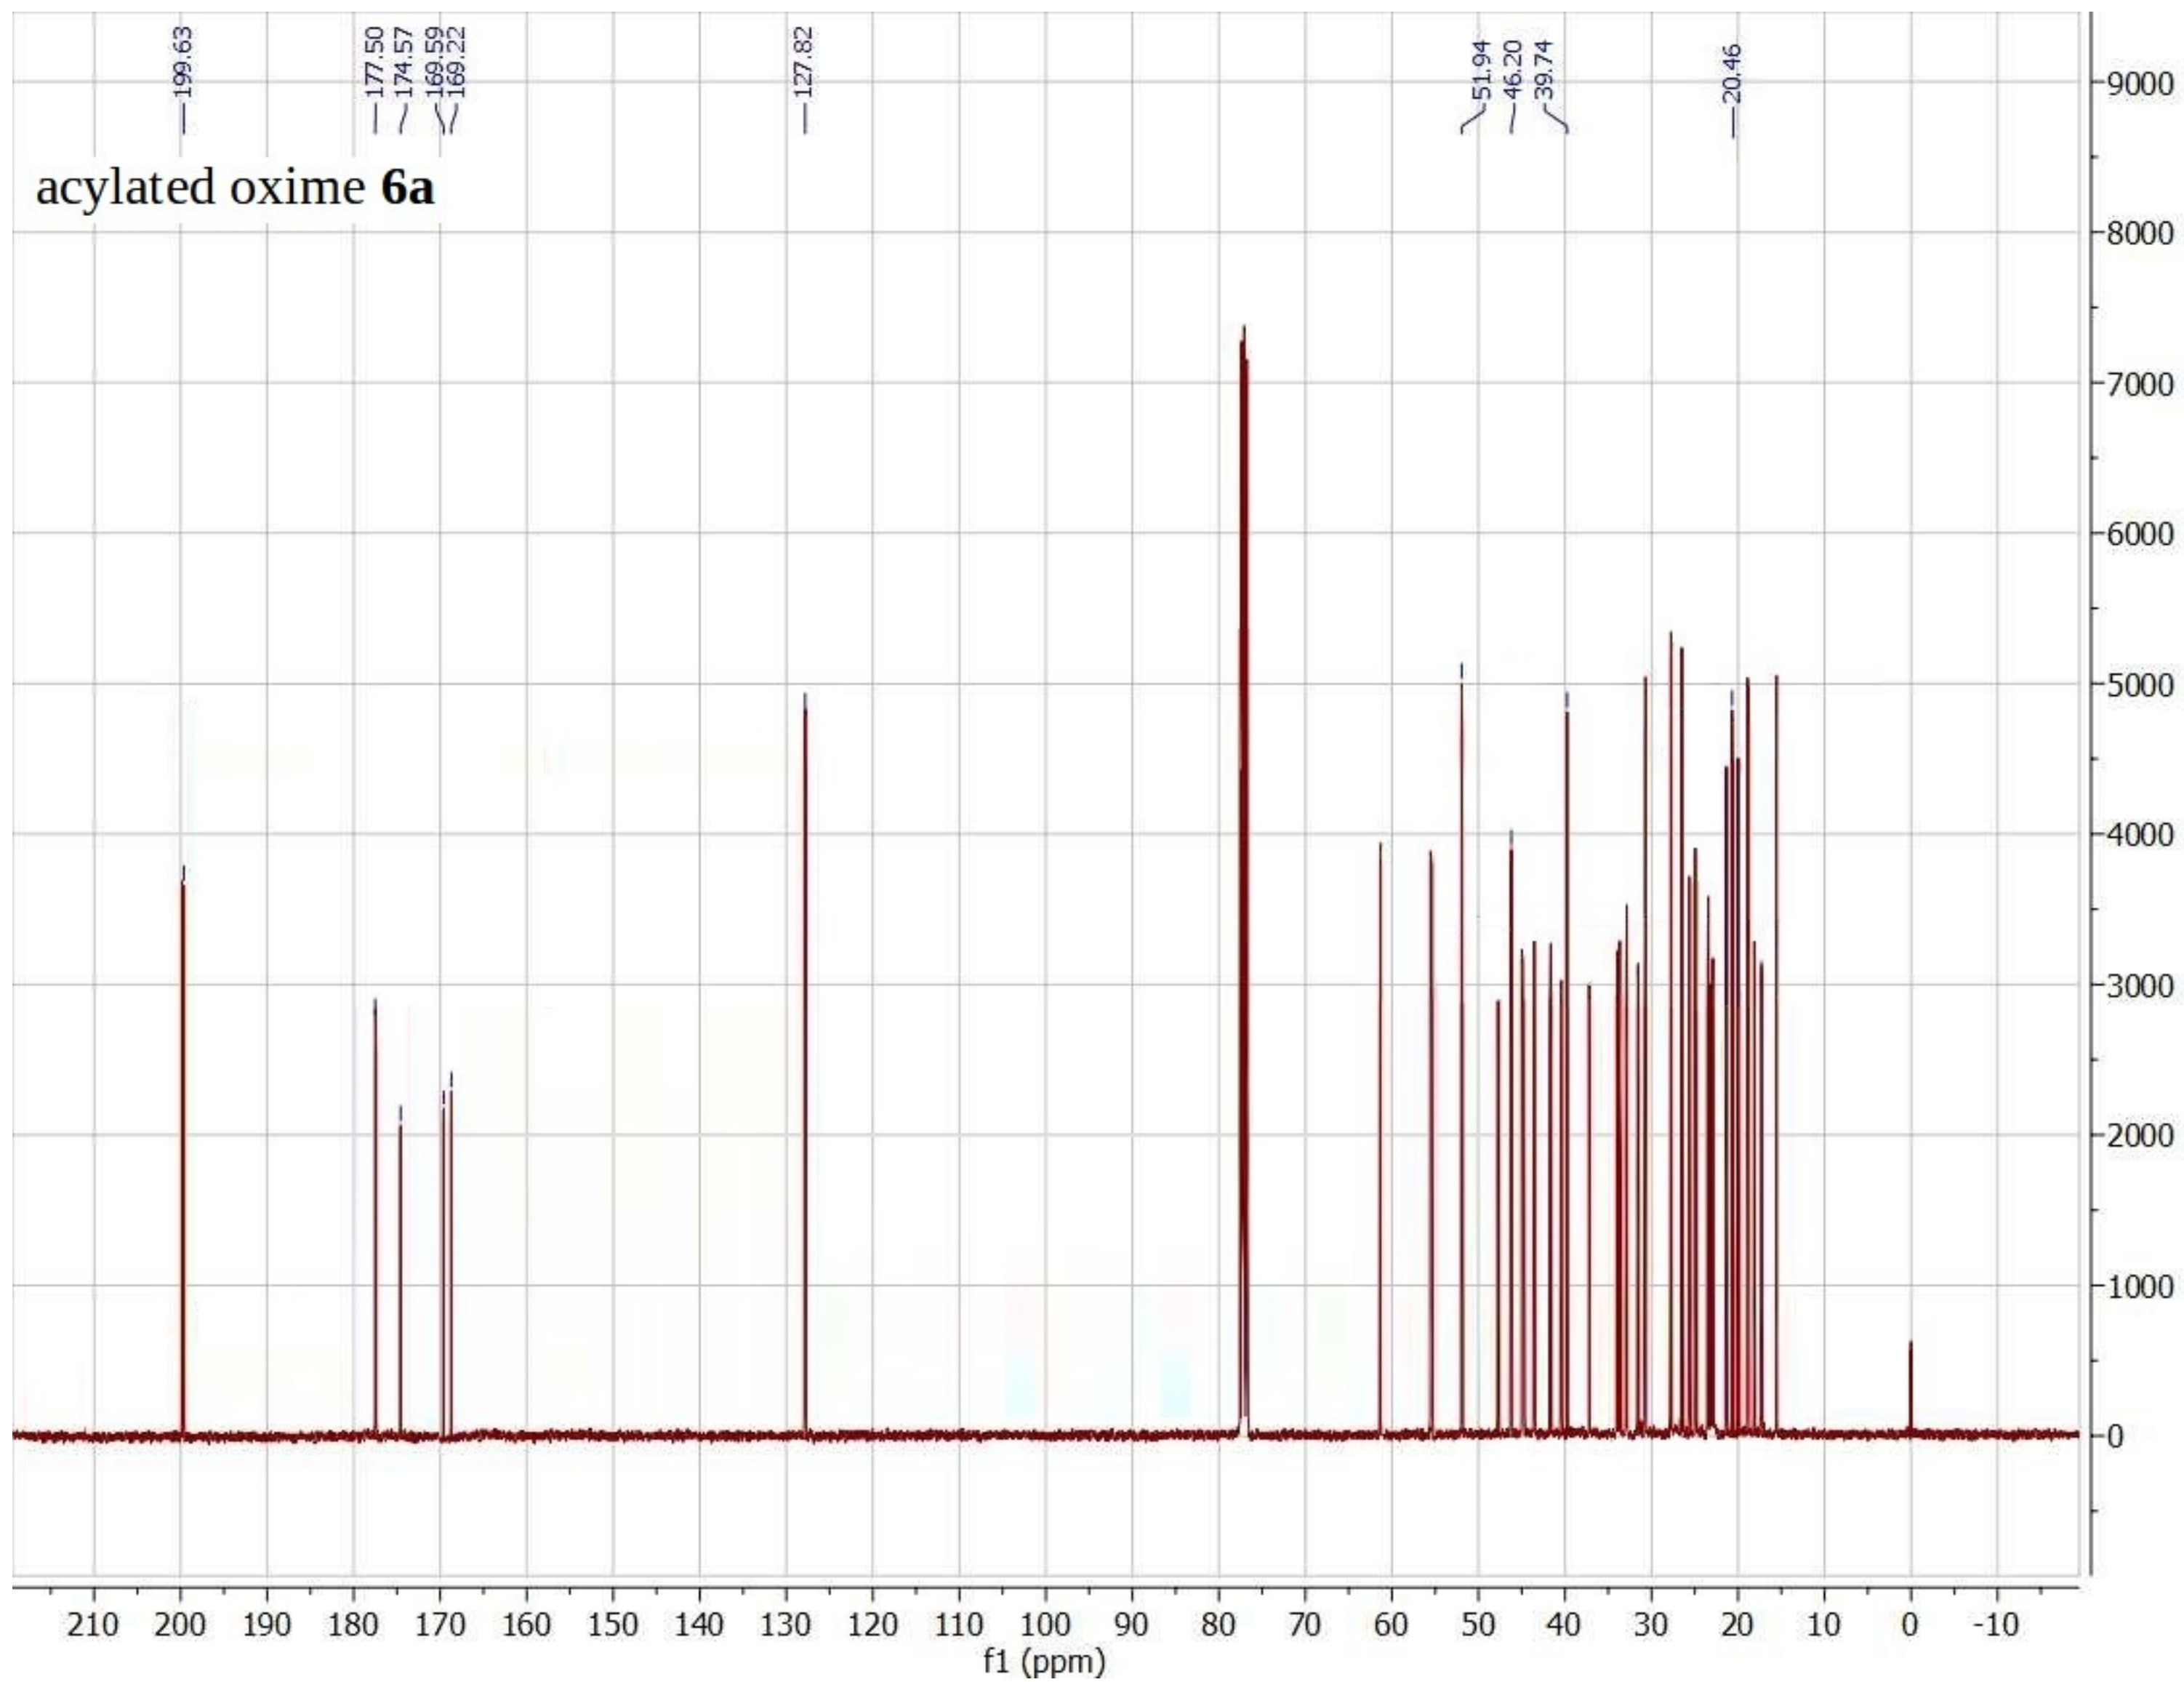



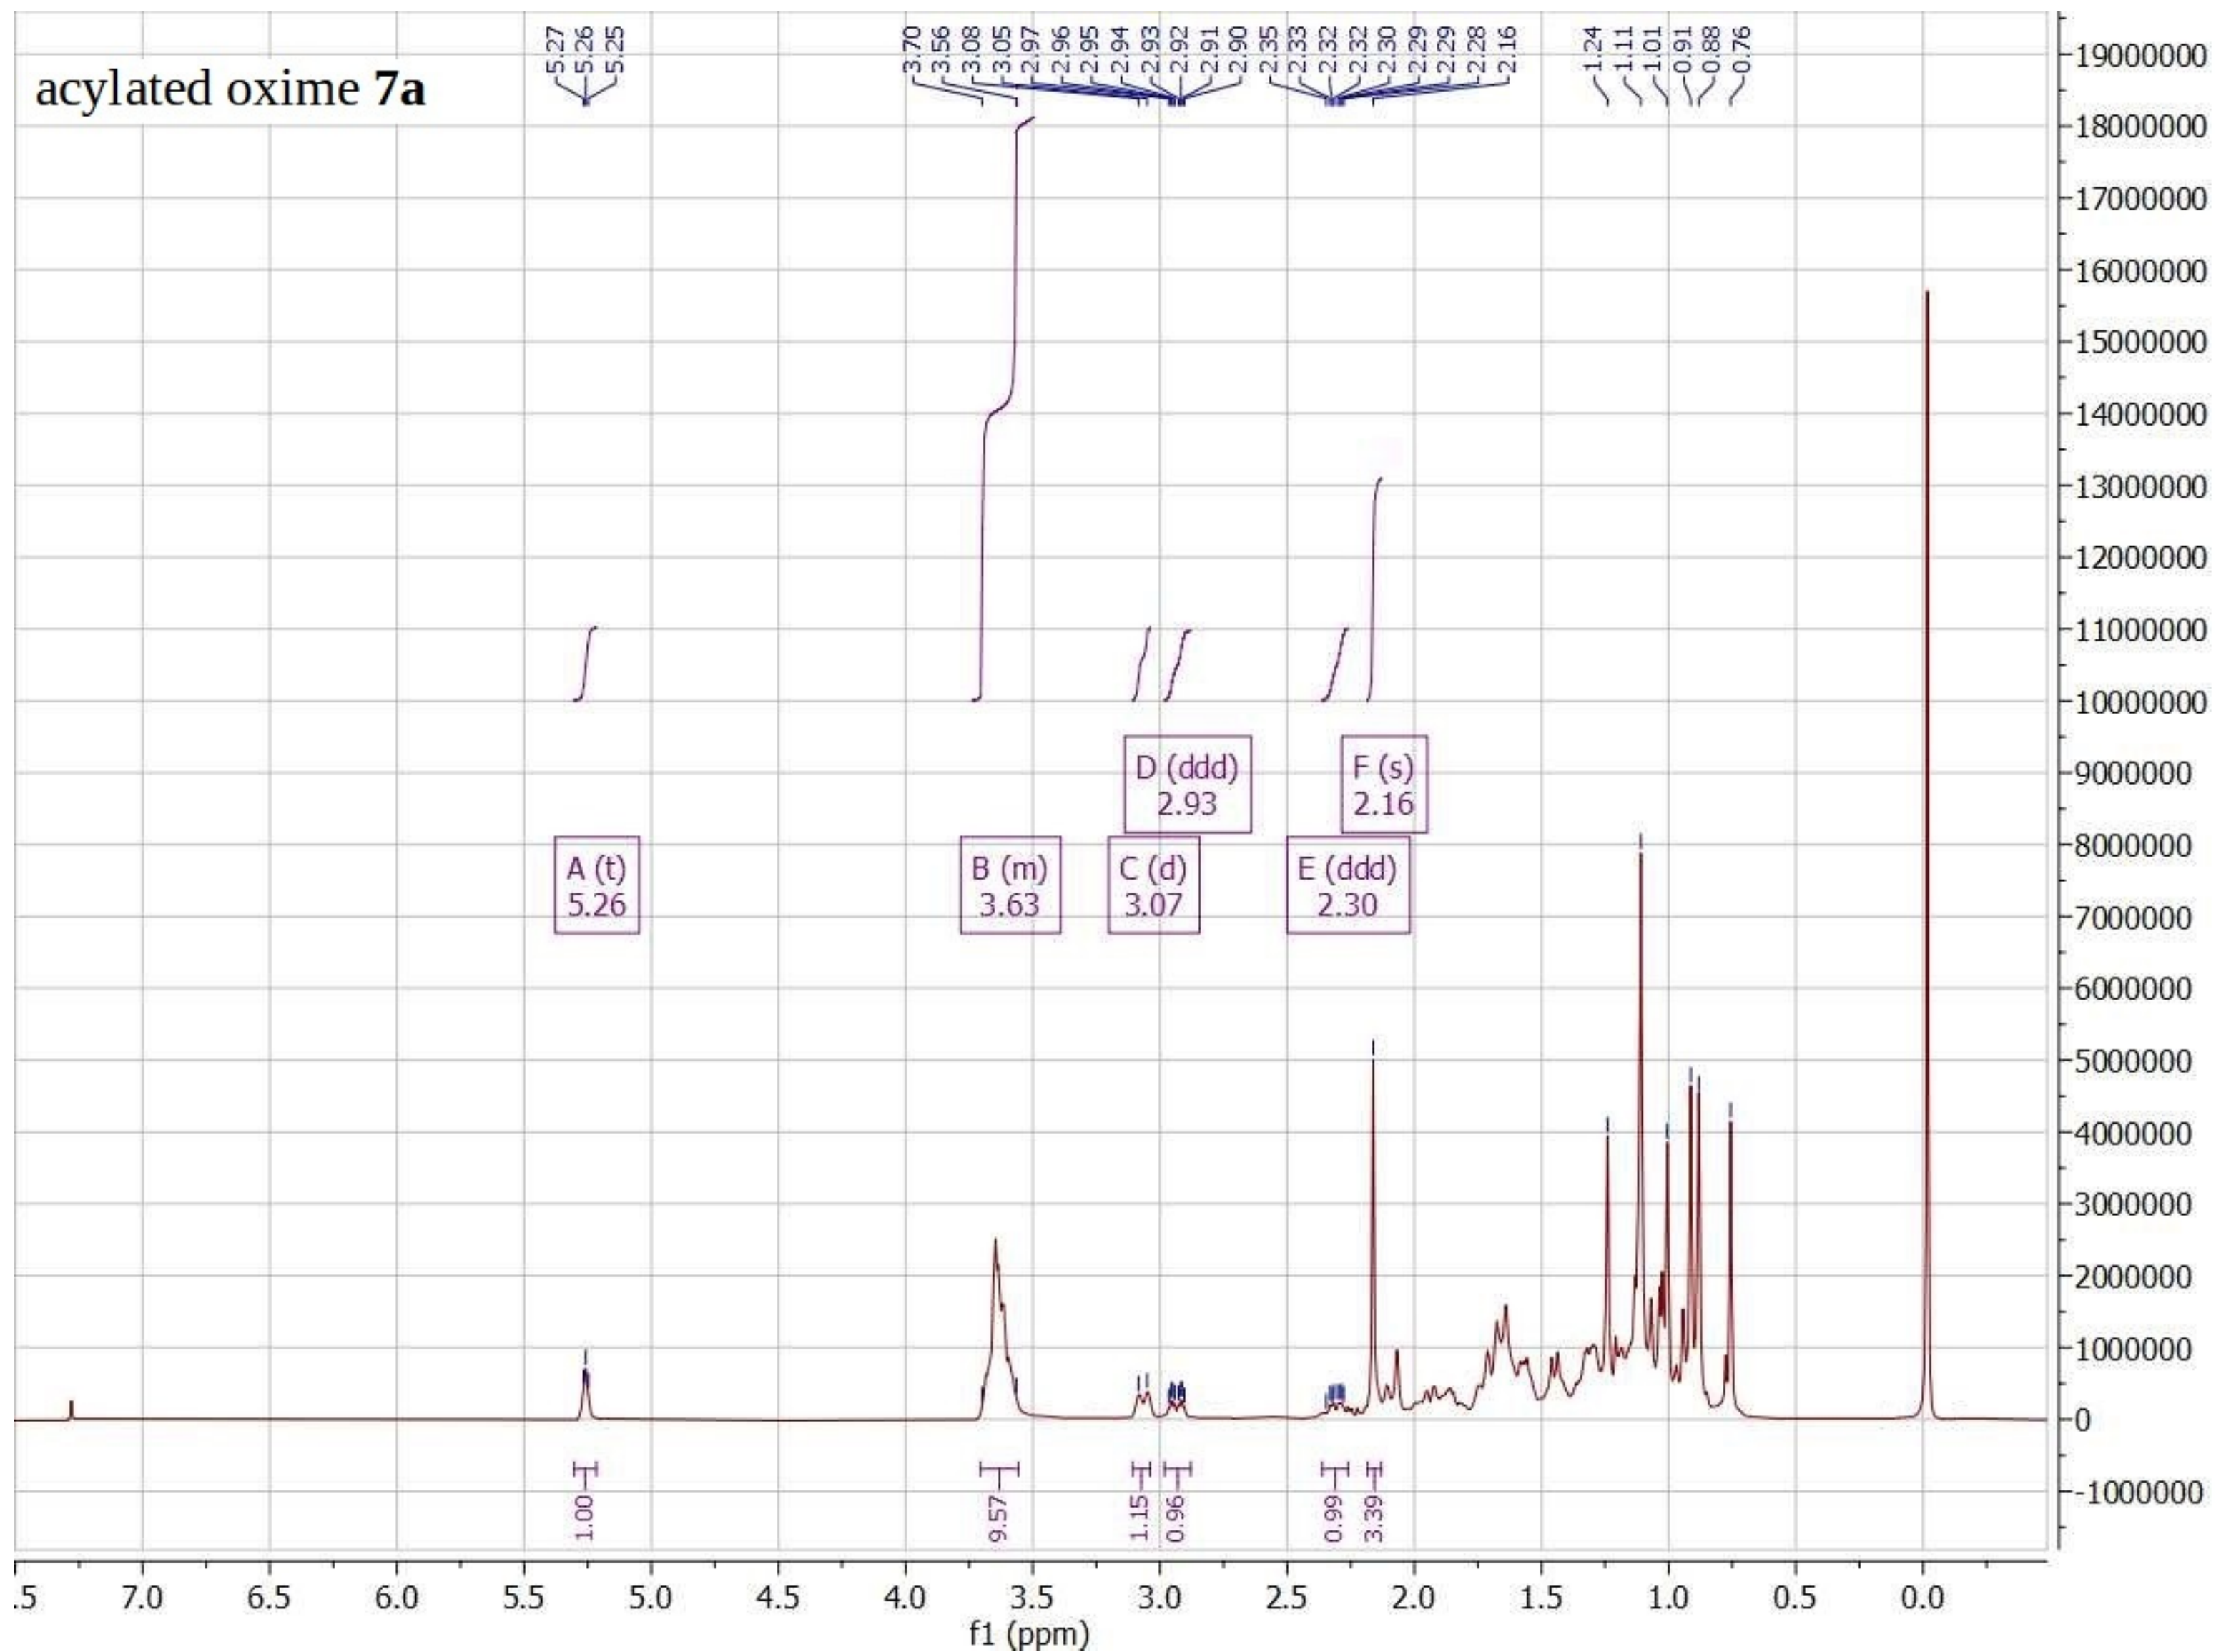

acylated oxime **7a**

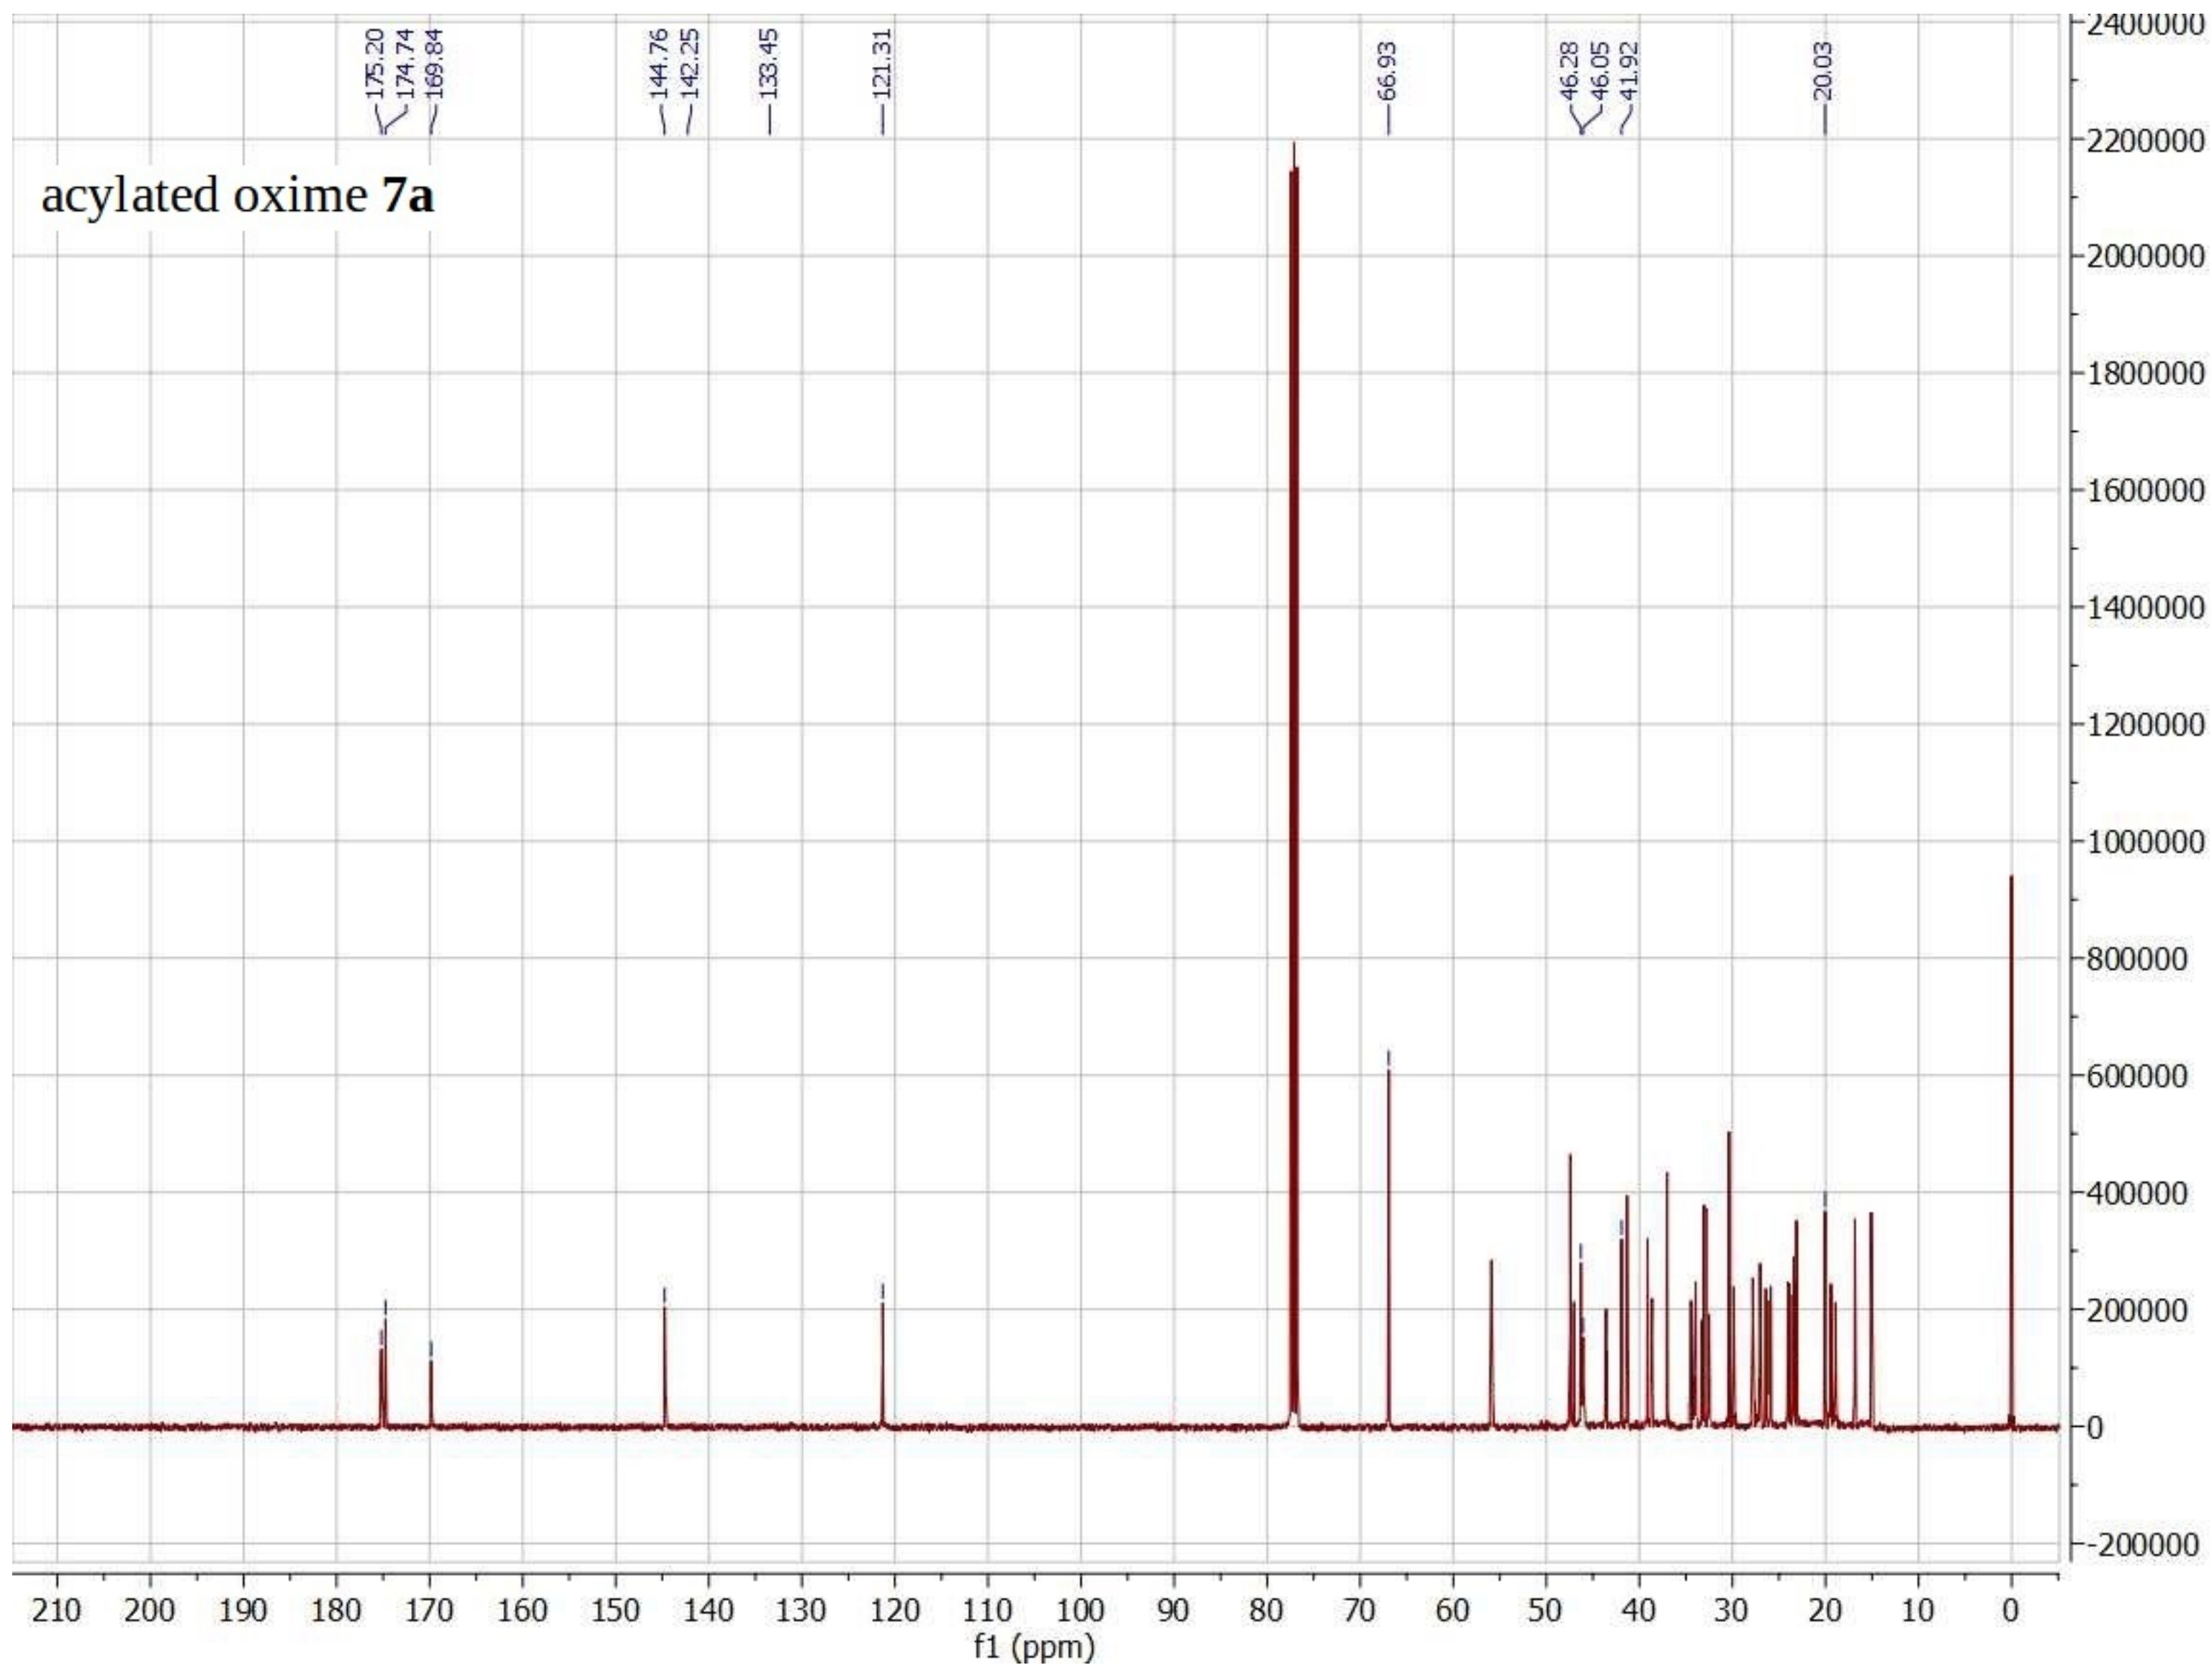

Supplement: s1 [file s1]
