# Supplementary material for: Acylation of Oleanolic Acid Oximes Effectively Improves Cytotoxic Activity in In Vitro Studies
Source: MDPI journal article supplement (doi:10.3390/pharmaceutics16010086), 2024-01-09
Supplement: s1 [file s1]

# Acylation of Oleanolic Acid Oximes Effectively Improves Cytotoxic Activity in In Vitro Studies

Barbara Bednarczyk-Cwynar and Piotr Ruszkowski

Supplementary Materials SM.S2. The detailed results of ADMEToxanalysis

Table S2. ADMETox data for oleanolic acid (1), oxime 2 and its acyl derivatives 5a – 5g

| Favorable value                                | Moderately favorable value | Nonfavorable value |         |         |         |         | Neutral value |         |         |
|------------------------------------------------|----------------------------|--------------------|---------|---------|---------|---------|---------------|---------|---------|
|                                                |                            |                    |         |         |         |         |               |         |         |
| Physicochemical Properties<br>(optimal values) | Compound number            |                    |         |         |         |         |               |         |         |
|                                                | 1<br>(OA)                  | 2                  | 5a      | 5b      | 5c      | 5d      | 5e            | 5f      | 5g      |
| Molecular Weight (100 ~ 600)                   | 456.360                    | 483.370            | 525.380 | 559.340 | 539.400 | 587.400 | 632.380       | 632.380 | 677.370 |
| Volume                                         | 505.750                    | 531.408            | 572.154 | 587.365 | 589.449 | 842.168 | 668.108       | 668.108 | 694.049 |
| Density                                        | 0.902                      | 0.910              | 0.918   | 0.952   | 0.915   | 0.915   | 0.947         | 0.947   | 0.976   |
| nHA (0 ~ 12)                                   | 3                          | 4                  | 5       | 5       | 5       | 5       | 8             | 8       | 11      |
| nHD (0 ~ 7)                                    | 2                          | 1                  | 0       | 0       | 0       | 0       | 0             | 0       | 0       |
| nRot (0 ~ 11)                                  | 1                          | 2                  | 4       | 5       | 5       | 5       | 6             | 6       | 7       |
| nRing (0 ~ 6)                                  | 5                          | 5                  | 5       | 5       | 5       | 6       | 6             | 6       | 6       |
| maxRing (0 ~ 18)                               | 22                         | 22                 | 22      | 22      | 22      | 22      | 22            | 22      | 22      |
| nHet (1 ~ 15)                                  | 3                          | 4                  | 5       | 6       | 5       | 5       | 8             | 8       | 11      |
| fChar (-4 ~ +4)                                | 0                          | 0                  | 0       | 0       | 0       | 0       | 0             | 0       | 0       |
| nRig (0 ~ 30)                                  | 27                         | 28                 | 29      | 29      | 29      | 35      | 36            | 36      | 37      |
| Flexibility (≤ 2)                              | 0.037                      | 0.071              | 0.138   | 0.172   | 0.172   | 0.143   | 0.167         | 0.167   | 0.189   |
| Stereo Centers (≤ 2)                           | 8                          | 7                  | 7       | 7       | 7       | 7       | 7             | 7       | 7       |
| tPSA (0 ~ 140)                                 | 57.530                     | 58.890             | 64.960  | 64.960  | 64.960  | 64.960  | 108.100       | 108.100 | 151.240 |
| LogS (-4 ~ 0.5)                                | -5.036                     | -6.159             | -5.987  | -6.328  | -6.369  | -6.905  | -6.817        | -6.860  | -6.502  |
| LogP (0 ~ 3)                                   | 6.113                      | 5.883              | 5.956   | 6.081   | 6.372   | 7.159   | 6.945         | 7.024   | 6.726   |
| LogD (1 ~ 3)                                   | 4.843                      | 4.625              | 4.060   | 4.090   | 4.725   | 5.248   | 5.323         | 5.383   | 5.062   |
| QED (> 0.67)                                   | 0.409                      | 0.179              | 0.159   | 0.115   | 0.157   | 0.153   | 0.108         | 0.108   | 0.098   |
| SA score (< 6)                                 | 4.589                      | 4.787              | 4.849   | 4.935   | 4.880   | 4.729   | 4.866         | 4.843   | 5.022   |
| Fsp3 (≥ 0.420)                                 | 0.900                      | 0.871              | 0.848   | 0.848   | 0.853   | 0.711   | 0.711         | 0.711   | 0.711   |
| MCE-18 (≥ 45)                                  | 105.368                    | 103.552            | 104.918 | 104.918 | 104.127 | 157.723 | 164.892       | 164.892 | 172.062 |
| NP score (-5 ~ 5)                              | 3.272                      | 2.939              | 2.700   | 2.539   | 2.581   | 2.208   | 1.751         | 1.835   | 1.726   |
| Lipinski Rule                                  | A                          | A                  | R       | R       | R       | R       | R             | R       | R       |
| Pfizer Rule                                    | R                          | IR                 | R       | R       | R       | R       | A             | A       | A       |
| GSK Rule                                       | R                          | R                  | R       | R       | R       | R       | R             | R       | R       |

|                                                 |                         |                         |                         |                         |                         |                         |                         |                         |                         |
|-------------------------------------------------|-------------------------|-------------------------|-------------------------|-------------------------|-------------------------|-------------------------|-------------------------|-------------------------|-------------------------|
| Golden Triangle                                 | A                       | A                       | R                       | R                       | R                       | R                       | R                       | R                       | R                       |
| PAINS (alerts)                                  | 0                       | 0                       | 0                       | 0                       | 0                       | 0                       | 0                       | 0                       | 0                       |
| ALARM NMR (alerts)                              | 0                       | 0                       | 0                       | 0                       | 0                       | 0                       | 1                       | 1                       | 1                       |
| BMS (alerts)                                    | 0                       | 1                       | 0                       | 2                       | 0                       | 0                       | 0                       | 0                       | 0                       |
| Chelator Rule (alerts)                          | 0                       | 0                       | 0                       | 0                       | 0                       | 0                       | 0                       | 0                       | 0                       |
| Caco-2 Permeability (> -5.15)                   | -5.198                  | -5.161                  | -5.022                  | -5.266                  | -5.005                  | -5.033                  | -5.040                  | -5.049                  | -5.041                  |
| MDCK Permeability (< 2 × 10 <sup>-6</sup> cm/s) | 1.20 × 10 <sup>-5</sup> | 1.30 × 10 <sup>-4</sup> | 1.51 × 10 <sup>-5</sup> | 1.49 × 10 <sup>-5</sup> | 1.46 × 10 <sup>-5</sup> | 1.53 × 10 <sup>-5</sup> | 3.64 × 10 <sup>-5</sup> | 3.27 × 10 <sup>-5</sup> | 1.80 × 10 <sup>-4</sup> |
| Pgp-inhibitor (0 – 0.300)                       | 0.000                   | 1.124                   | 0.239                   | 0.075                   | 0.178                   | 0.902                   | 0.709                   | 0.691                   | 0.367                   |
| Pgp-substrate (0 – 0.300)                       | 0.000                   | 0.000                   | 0.000                   | 0.000                   | 0.000                   | 0.000                   | 0.000                   | 0.000                   | 0.000                   |
| HIA (0 – 0.300)                                 | 0.012                   | 0.064                   | 0.163                   | 0.254                   | 0.206                   | 0.017                   | 0.031                   | 0.028                   | 0.053                   |
| F <sub>20%</sub> (0 – 0.300)                    | 0.074                   | 0.674                   | 0.903                   | 0.843                   | 0.831                   | 0.937                   | 0.973                   | 0.971                   | 0.975                   |
| F <sub>30%</sub> (0 – 0.300)                    | 0.756                   | 0.951                   | 0.958                   | 0.965                   | 0.954                   | 0.899                   | 0.776                   | 0.784                   | 0.421                   |
| PPB (< 90%)                                     | 98.130                  | 98.950                  | 96.390                  | 98.070                  | 95.140                  | 99.740                  | 100.230                 | 99.950                  | 100.570                 |
| VD (0.04 – 20 L/kg)                             | 0.718                   | 1.251                   | 1.389                   | 1.027                   | 0.979                   | 1.626                   | 1.299                   | 1.311                   | 1.379                   |
| BBB Penetration (0 – 0.300)                     | 0.674                   | 0.112                   | 0.163                   | 0.203                   | 0.107                   | 0.012                   | 0.037                   | 0.027                   | 0.154                   |
| Fu (5 – 20%)                                    | 3.524                   | 2.089%                  | 1.879%                  | 2.109                   | 2.091                   | 2.624                   | 1.482                   | 1.758                   | 1.090                   |
| CYP1A2 inhibitor                                | 0.012                   | 0.054                   | 0.039                   | 0.048                   | 0.040                   | 0.039                   | 0.048                   | 0.045                   | 0.055                   |
| CYP1A2 substrate                                | 0.323                   | 0.651                   | 0.415                   | 0.431                   | 0.431                   | 0.396                   | 0.574                   | 0.607                   | 0.671                   |
| CYP2C19 inhibitor                               | 0.028                   | 0.207                   | 0.123                   | 0.174                   | 0.159                   | 0.158                   | 0.233                   | 0.205                   | 0.343                   |
| CYP2C19 substrate                               | 0.916                   | 0.834                   | 0.941                   | 0.942                   | 0.944                   | 0.939                   | 0.871                   | 0.876                   | 0.652                   |
| CYP2C9 inhibitor                                | 0.157                   | 0.560                   | 0.261                   | 0.319                   | 0.326                   | 0.198                   | 0.333                   | 0.262                   | 0.454                   |
| CYP2C9 substrate                                | 0.813                   | 0.347                   | 0.338                   | 0.397                   | 0.385                   | 0.693                   | 0.724                   | 0.849                   | 0.476                   |
| CYP2D6 inhibitor                                | 0.012                   | 0.375                   | 0.092                   | 0.096                   | 0.086                   | 0.126                   | 0.275                   | 0.161                   | 0.269                   |
| CYP2D6 substrate                                | 0.528                   | 0.302                   | 0.158                   | 0.146                   | 0.153                   | 0.218                   | 0.370                   | 0.649                   | 0.244                   |
| CYP3A4 inhibitor                                | 0.172                   | 0.886                   | 0.800                   | 0.889                   | 0.883                   | 0.816                   | 0.864                   | 0.775                   | 0.900                   |
| CYP3A4 substrate                                | 0.208                   | 0.749                   | 0.738                   | 0.777                   | 0.788                   | 0.565                   | 0.507                   | 0.519                   | 0.346                   |
| CL (>15 mL/min/kg)                              | 3.094                   | 2.107                   | 1.907                   | 2.651                   | 3.188                   | 3.418                   | 3.111                   | 2.837                   | 3.025                   |
| T <sub>1/2</sub> (0 – 0.300)                    | 0.023                   | 0.019                   | 0.016                   | 0.025                   | 0.013                   | 0.008                   | 0.009                   | 0.006                   | 0.015                   |
| hERG Blockers (0 – 0.300)                       | 0.004                   | 0.006                   | 0.002                   | 0.003                   | 0.003                   | 0.004                   | 0.009                   | 0.011                   | 0.023                   |
| H-HT (0 – 0.300)                                | 0.296                   | 0.580                   | 0.409                   | 0.145                   | 0.407                   | 0.296                   | 0.375                   | 0.349                   | 0.601                   |
| DILI (0 – 0.3)                                  | 0.010                   | 0.014                   | 0.026                   | 0.042                   | 0.022                   | 0.028                   | 0.049                   | 0.067                   | 0.126                   |
| AMESToxicity (0 – 0.300)                        | 0.008                   | 0.002                   | 0.002                   | 0.005                   | 0.002                   | 0.004                   | 0.010                   | 0.012                   | 0.034                   |
| Rat Oral Acute Toxicity (0 – 0.300)             | 0.228                   | 0.043                   | 0.150                   | 0.217                   | 0.104                   | 0.085                   | 0.162                   | 0.195                   | 0.558                   |
| FDAMDD (0 – 0.300)                              | 0.909                   | 0.468                   | 0.478                   | 0.524                   | 0.496                   | 0.513                   | 0.558                   | 0.550                   | 0.595                   |
| Skin Sensitization (0 – 0.300)                  | 0.028                   | 0.013                   | 0.020                   | 0.052                   | 0.021                   | 0.039                   | 0.042                   | 0.043                   | 0.160                   |
| Carcinogenicity (0 – 0.300)                     | 0.063                   | 0.117                   | 0.082                   | 0.364                   | 0.082                   | 0.057                   | 0.198                   | 0.287                   | 0.569                   |
| Eye Corrosion (0 – 0.300)                       | 0.012                   | 0.004                   | 0.008                   | 0.645                   | 0.011                   | 0.003                   | 0.003                   | 0.003                   | 0.003                   |
| Eye Irritation (0 – 0.300)                      | 0.084                   | 0.055                   | 0.097                   | 0.271                   | 0.092                   | 0.125                   | 0.058                   | 0.060                   | 0.041                   |
| Respiratory Toxicity (0 – 0.300)                | 0.968                   | 0.973                   | 0.970                   | 0.986                   | 0.967                   | 0.938                   | 0.935                   | 0.927                   | 0.928                   |
| Bioconcentration Factors                        | 1.944                   | 2.991                   | 2.999                   | 2.804                   | 2.981                   | 2.709                   | 2.717                   | 2.632                   | 2.843                   |
| IGC <sub>50</sub>                               | 5.021                   | 5.027                   | 5.053                   | 5.283                   | 5.054                   | 5.425                   | 5.446                   | 5.501                   | 5.398                   |

|                                     |       |       |       |       |       |       |       |       |       |
|-------------------------------------|-------|-------|-------|-------|-------|-------|-------|-------|-------|
| LC <sub>50</sub> FM                 | 5.937 | 5.658 | 5.966 | 6.218 | 5.854 | 6.141 | 6.334 | 6.402 | 6.489 |
| LC <sub>50</sub> DM                 | 6.337 | 6.350 | 6.264 | 6.659 | 6.321 | 6.260 | 6.280 | 6.322 | 6.257 |
| NR-AR (0 – 0.300)                   | 0.369 | 0.391 | 0.314 | 0.220 | 0.421 | 0.234 | 0.494 | 0.396 | 0.591 |
| NR-AR-LBD (0 – 0.300)               | 0.273 | 0.815 | 0.620 | 0.808 | 0.618 | 0.742 | 0.838 | 0.843 | 0.876 |
| NR-AhR (0 – 0.300)                  | 0.001 | 0.001 | 0.001 | 0.001 | 0.001 | 0.002 | 0.003 | 0.004 | 0.012 |
| NR-Aromatase (0 – 0.300)            | 0.759 | 0.721 | 0.709 | 0.731 | 0.629 | 0.599 | 0.710 | 0.732 | 0.829 |
| NR-ER (0 – 0.300)                   | 0.412 | 0.668 | 0.363 | 0.623 | 0.384 | 0.779 | 0.880 | 0.900 | 0.829 |
| NR-ER-LBD (0 – 0.300)               | 0.593 | 0.815 | 0.800 | 0.902 | 0.845 | 0.860 | 0.882 | 0.911 | 0.936 |
| NR-PPAR gamma (0 – 0.300)           | 0.965 | 0.961 | 0.863 | 0.961 | 0.925 | 0.925 | 0.965 | 0.968 | 0.969 |
| SR-ARE (0 – 0.300)                  | 0.556 | 0.475 | 0.635 | 0.788 | 0.514 | 0.467 | 0.753 | 0.779 | 0.915 |
| SR-ATAD5 (0 – 0.300)                | 0.052 | 0.760 | 0.676 | 0.669 | 0.430 | 0.461 | 0.505 | 0.510 | 0.708 |
| SR-HSE (0 – 0.300)                  | 0.747 | 0.789 | 0.759 | 0.850 | 0.634 | 0.726 | 0.779 | 0.807 | 0.857 |
| SR-MMP (0 – 0.300)                  | 0.971 | 0.932 | 0.856 | 0.917 | 0.693 | 0.875 | 0.937 | 0.942 | 0.960 |
| SR-p53 (0 – 0.300)                  | 0.271 | 0.471 | 0.708 | 0.807 | 0.432 | 0.365 | 0.633 | 0.684 | 0.943 |
| Toxicophores                        | 0     | 2     | 1     | 2     | 1     | 1     | 3     | 3     | 3     |
| Genotoxic Carcin. Rule (alerts)     | 0     | 2     | 0     | 4     | 0     | 0     | 5     | 5     | 5     |
| Non Genotoxic Carcin. Rule (alerts) | 0     | 0     | 0     | 1     | 0     | 0     | 0     | 0     | 0     |
| Skin Sensitization Rule (alerts)    | 0     | 0     | 0     | 2     | 0     | 0     | 0     | 0     | 0     |
| Aquatic Toxicity Rule (alerts)      | 1     | 0     | 0     | 1     | 0     | 0     | 0     | 0     | 0     |
| Non Biodegradable Rule (alerts)     | 0     | 0     | 0     | 0     | 0     | 0     | 2     | 2     | 2     |
| LD <sub>50</sub> (oral)             | 0     | 0     | 0     | 0     | 0     | 0     | 0     | 0     | 0     |
| SureChEMBL                          | 0     | 2     | 2     | 3     | 2     | 2     | 2     | 2     | 4     |

Table 3. ADMETox data for oxime 3 and its acyl derivatives 6a – 6g

| Favorable value              | Moderately favorable value |         |         | Nonfavorable value |         | Neutral value |         |         |
|------------------------------|----------------------------|---------|---------|--------------------|---------|---------------|---------|---------|
|                              |                            |         |         |                    |         |               |         |         |
| Physicochemical Properties   | Compound number            |         |         |                    |         |               |         |         |
| (optimal values)             | 3                          | 6a      | 6b      | 6c                 | 6d      | 6e            | 6f      | 6g      |
| Molecular Weight (100 ~ 600) | 497.350                    | 539.360 | 573.320 | 553.380            | 601.380 | 646.360       | 646.360 | 691.350 |
| Volume                       | 537.562                    | 578.307 | 593.518 | 595.603            | 648.321 | 674.262       | 674.262 | 700.203 |
| Density                      | 0.925                      | 0.933   | 0.966   | 0.929              | 0.928   | 0.959         | 0.959   | 0.987   |
| nHA (0 ~ 12)                 | 5                          | 6       | 6       | 6                  | 6       | 9             | 9       | 12      |
| nHD (0 ~ 7)                  | 1                          | 0       | 0       | 0                  | 0       | 0             | 0       | 0       |
| nRot (0 ~ 11)                | 2                          | 4       | 5       | 5                  | 5       | 6             | 6       | 7       |
| nRing (0 ~ 6)                | 5                          | 5       | 5       | 5                  | 6       | 6             | 6       | 6       |
| maxRing (0 ~ 18)             | 22                         | 22      | 22      | 22                 | 22      | 22            | 22      | 22      |
| nHet (1 ~ 15)                | 5                          | 6       | 7       | 6                  | 6       | 9             | 9       | 12      |
| fChar (-4 ~ +4)              | 0                          | 0       | 0       | 0                  | 0       | 0             | 0       | 0       |
| nRig (0 ~ 30)                | 29                         | 30      | 30      | 30                 | 36      | 37            | 37      | 38      |
| Flexibility (≤ 2)            | 0.069                      | 0.133   | 0.167   | 0.167              | 0.139   | 0.162         | 0.162   | 0.184   |
| Stereo Centers (≤ 2)         | 7                          | 7       | 7       | 7                  | 7       | 7             | 7       | 7       |

|                                                 |                            |                            |                            |                            |                            |                            |                            |                            |
|-------------------------------------------------|----------------------------|----------------------------|----------------------------|----------------------------|----------------------------|----------------------------|----------------------------|----------------------------|
| tPSA (0 ~ 140)                                  | 75.960                     | 82.030                     | 82.030                     | 82.030                     | 82.030                     | 125.170                    | 125.170                    | 168.310                    |
| LogS (-4 ~ 0.5)                                 | -5.497                     | -5.448                     | -5.925                     | -5.826                     | -6.550                     | -6.483                     | -6.525                     | -6.242                     |
| LogP (0 ~ 3)                                    | 5.091                      | 5.219                      | 5.403                      | 5.649                      | 6.469                      | 6.263                      | 6.342                      | 6.116                      |
| LogD (1 ~ 3)                                    | 4.110                      | 3.270                      | 3.482                      | 4.025                      | 4.776                      | 4.833                      | 4.952                      | 4.635                      |
| QED (> 0.67)                                    | 0.241                      | 0.213                      | 0.153                      | 0.206                      | 0.198                      | 0.140                      | 0.140                      | 0.128                      |
| SA score (< 6)                                  | 4.851                      | 4.912                      | 4.997                      | 4.943                      | 4.794                      | 4.929                      | 4.907                      | 5.084                      |
| Fsp3 (≥ 0.420)                                  | 0.839                      | 0.818                      | 0.818                      | 0.824                      | 0.684                      | 0.684                      | 0.684                      | 0.684                      |
| MCE-18 (≥ 45)                                   | 105.263                    | 106.600                    | 106.600                    | 105.806                    | 160.312                    | 167.438                    | 167.438                    | 174.562                    |
| NP score (-5 ~ 5)                               | 2.908                      | 2.677                      | 2.521                      | 2.562                      | 2.199                      | 1.752                      | 1.843                      | 1.727                      |
| Lipinski Rule                                   | A                          | R                          | R                          | R                          | R                          | R                          | R                          | R                          |
| Pfizer Rule                                     | A                          | A                          | A                          | A                          | A                          | A                          | A                          | A                          |
| GSK Rule                                        | R                          | R                          | R                          | R                          | R                          | R                          | R                          | R                          |
| Golden Triangle                                 | A                          | R                          | R                          | R                          | R                          | R                          | R                          | R                          |
| PAINS (alerts)                                  | 0                          | 0                          | 0                          | 0                          | 0                          | 0                          | 0                          | 0                          |
| ALARM NMR (alerts)                              | 1                          | 1                          | 1                          | 1                          | 1                          | 2                          | 2                          | 2                          |
| BMS (alerts)                                    | 1                          | 0                          | 2                          | 0                          | 0                          | 0                          | 0                          | 0                          |
| Chelator Rule (alerts)                          | 0                          | 0                          | 0                          | 0                          | 0                          | 0                          | 0                          | 0                          |
| Caco-2 Permeability (> -5.15)                   | -5.308                     | -5.182                     | -5.297                     | -5.135                     | -5.164                     | -5.181                     | -5.187                     | -5.190                     |
| MDCK Permeability (< 2 × 10 <sup>-6</sup> cm/s) | 2.01<br>× 10 <sup>-5</sup> | 1.81<br>× 10 <sup>-5</sup> | 1.99<br>× 10 <sup>-5</sup> | 1.81<br>× 10 <sup>-5</sup> | 1.84<br>× 10 <sup>-5</sup> | 5.14<br>× 10 <sup>-5</sup> | 4.63<br>× 10 <sup>-5</sup> | 2.20<br>× 10 <sup>-5</sup> |
| Pgp-inhibitor (0 – 0.300)                       | 0.921                      | 0.966                      | 0.595                      | 0.954                      | 0.997                      | 0.996                      | 0.995                      | 0.993                      |
| Pgp-substrate (0 – 0.300)                       | 0.000                      | 0.000                      | 0.000                      | 0.000                      | 0.000                      | 0.000                      | 0.000                      | 0.000                      |
| HIA (0 – 0.300)                                 | 0.408                      | 0.654                      | 0.674                      | 0.673                      | 0.108                      | 0.185                      | 0.160                      | 0.263                      |
| F <sub>20%</sub> (0 – 0.300)                    | 0.977                      | 0.996                      | 0.983                      | 0.994                      | 0.996                      | 0.997                      | 0.996                      | 0.997                      |
| F <sub>30%</sub> (0 – 0.300)                    | 0.982                      | 0.979                      | 0.986                      | 0.981                      | 0.938                      | 0.868                      | 0.872                      | 0.738                      |
| PPB (< 90%)                                     | 96.219                     | 90.920                     | 95.98                      | 92.56                      | 99.08                      | 99.13                      | 98.66                      | 99.14                      |
| VD (0.04 – 20 L/kg)                             | 1.142                      | 1.176                      | 0.957                      | 0.859                      | 1.389                      | 1.409                      | 1.418                      | 1.448                      |
| BBB Penetration (0 – 0.300)                     | 0.046                      | 0.083                      | 0.098                      | 0.057                      | 0.006                      | 0.016                      | 0.011                      | 0.108                      |
| Fu (5 – 20%)                                    | 3.704                      | 4.331                      | 3.482                      | 2.925                      | 2.188                      | 1.426                      | 1.594                      | 1.463                      |
| CYP1A2 inhibitor                                | 0.024                      | 0.017                      | 0.021                      | 0.017                      | 0.039                      | 0.042                      | 0.034                      | 0.048                      |
| CYP1A2 substrate                                | 0.850                      | 0.660                      | 0.649                      | 0.639                      | 0.548                      | 0.765                      | 0.788                      | 0.886                      |
| CYP2C19 inhibitor                               | 0.370                      | 0.217                      | 0.312                      | 0.262                      | 0.353                      | 0.460                      | 0.392                      | 0.578                      |
| CYP2C19 substrate                               | 0.812                      | 0.931                      | 0.931                      | 0.934                      | 0.927                      | 0.849                      | 0.855                      | 0.655                      |
| CYP2C9 inhibitor                                | 0.568                      | 0.319                      | 0.398                      | 0.402                      | 0.404                      | 0.480                      | 0.403                      | 0.508                      |
| CYP2C9 substrate                                | 0.092                      | 0.080                      | 0.096                      | 0.093                      | 0.230                      | 0.158                      | 0.260                      | 0.101                      |
| CYP2D6 inhibitor                                | 0.046                      | 0.023                      | 0.022                      | 0.019                      | 0.112                      | 0.317                      | 0.173                      | 0.408                      |
| CYP2D6 substrate                                | 0.077                      | 0.076                      | 0.070                      | 0.075                      | 0.088                      | 0.114                      | 0.157                      | 0.095                      |
| CYP3A4 inhibitor                                | 0.904                      | 0.836                      | 0.894                      | 0.889                      | 0.907                      | 0.931                      | 0.893                      | 0.945                      |
| CYP3A4 substrate                                | 0.840                      | 0.871                      | 0.886                      | 0.889                      | 0.803                      | 0.693                      | 0.703                      | 0.531                      |
| CL (>15 mL/min/kg)                              | 1.850                      | 1.844                      | 2.779                      | 3.299                      | 3.054                      | 2.833                      | 2.554                      | 2.756                      |
| T <sub>1/2</sub> (0 – 0.300)                    | 0.032                      | 0.027                      | 0.041                      | 0.021                      | 0.012                      | 0.013                      | 0.010                      | 0.023                      |
| hERG Blockers (0 – 0.300)                       | 0.006                      | 0.003                      | 0.003                      | 0.003                      | 0.005                      | 0.014                      | 0.019                      | 0.039                      |

|                                         |       |       |       |       |       |       |       |       |
|-----------------------------------------|-------|-------|-------|-------|-------|-------|-------|-------|
| H-HT (0 – 0.300)                        | 0.516 | 0.391 | 0.170 | 0.379 | 0.341 | 0.441 | 0.438 | 0.575 |
| DILI (0 – 0.3)                          | 0.017 | 0.032 | 0.045 | 0.027 | 0.030 | 0.054 | 0.077 | 0.117 |
| AMES Toxicity (0 – 0.300)               | 0.020 | 0.025 | 0.025 | 0.019 | 0.028 | 0.017 | 0.017 | 0.053 |
| Rat Oral Acute Toxicity (0 – 0.300)     | 0.111 | 0.218 | 0.355 | 0.151 | 0.179 | 0.268 | 0.311 | 0.594 |
| FDAMDD (0 – 0.300)                      | 0.667 | 0.502 | 0.571 | 0.618 | 0.524 | 0.600 | 0.616 | 0.666 |
| Skin Sensitization (0 – 0.300)          | 0.013 | 0.018 | 0.038 | 0.017 | 0.024 | 0.030 | 0.031 | 0.062 |
| Carcinogenicity (0 – 0.300)             | 0.422 | 0.244 | 0.559 | 0.221 | 0.151 | 0.575 | 0.705 | 0.787 |
| Eye Corrosion (0 – 0.300)               | 0.003 | 0.003 | 0.031 | 0.004 | 0.003 | 0.003 | 0.003 | 0.003 |
| Eye Irritation (0 – 0.300)              | 0.045 | 0.058 | 0.159 | 0.046 | 0.077 | 0.043 | 0.046 | 0.039 |
| Respiratory Toxicity (0 – 0.300)        | 0.978 | 0.977 | 0.988 | 0.974 | 0.960 | 0.960 | 0.958 | 0.961 |
| Bioconcentration Factors                | 2.736 | 2.752 | 2.362 | 2.675 | 2.501 | 2.385 | 2.274 | 1.979 |
| IGC <sub>50</sub>                       | 4.832 | 4.887 | 5.218 | 4.889 | 5.279 | 5.283 | 5.331 | 5.231 |
| LC <sub>50</sub> FM                     | 5.114 | 5.778 | 6.196 | 5.602 | 5.992 | 6.196 | 6.288 | 6.379 |
| LC <sub>50</sub> DM                     | 6.029 | 6.215 | 6.292 | 6.256 | 6.283 | 6.315 | 6.361 | 6.290 |
| NR-AR (0 – 0.300)                       | 0.688 | 0.610 | 0.526 | 0.650 | 0.620 | 0.692 | 0.635 | 0.720 |
| NR-AR-LBD (0 – 0.300)                   | 0.905 | 0.832 | 0.893 | 0.835 | 0.884 | 0.904 | 0.905 | 0.930 |
| NR-AhR (0 – 0.300)                      | 0.001 | 0.002 | 0.001 | 0.001 | 0.002 | 0.003 | 0.004 | 0.010 |
| NR-Aromatase (0 – 0.300)                | 0.852 | 0.825 | 0.848 | 0.798 | 0.795 | 0.851 | 0.854 | 0.892 |
| NR-ER (0 – 0.300)                       | 0.484 | 0.315 | 0.501 | 0.398 | 0.724 | 0.728 | 0.797 | 0.703 |
| NR-ER-LBD (0 – 0.300)                   | 0.808 | 0.837 | 0.917 | 0.873 | 0.850 | 0.906 | 0.920 | 0.954 |
| NR-PPAR gamma (0 – 0.300)               | 0.947 | 0.865 | 0.974 | 0.925 | 0.939 | 0.959 | 0.961 | 0.957 |
| SR-ARE (0 – 0.300)                      | 0.694 | 0.809 | 0.916 | 0.718 | 0.717 | 0.895 | 0.900 | 0.956 |
| SR-ATAD5 (0 – 0.300)                    | 0.896 | 0.894 | 0.914 | 0.839 | 0.836 | 0.841 | 0.831 | 0.899 |
| SR-HSE (0 – 0.300)                      | 0.805 | 0.807 | 0.884 | 0.737 | 0.781 | 0.839 | 0.838 | 0.881 |
| SR-MMP (0 – 0.300)                      | 0.934 | 0.830 | 0.907 | 0.656 | 0.889 | 0.937 | 0.943 | 0.969 |
| SR-p53 (0 – 0.300)                      | 0.222 | 0.896 | 0.995 | 0.754 | 0.704 | 0.872 | 0.897 | 0.977 |
| Toxicophores                            | 3     | 2     | 3     | 2     | 2     | 4     | 4     | 4     |
| Genotoxic Carcinogenicity Rule (alerts) | 3     | 1     | 5     | 1     | 1     | 6     | 6     | 6     |
| Non Genotoxic Carcinogen. Rule (alerts) | 1     | 1     | 2     | 1     | 1     | 1     | 1     | 1     |
| Skin Sensitization Rule (alerts)        | 3     | 3     | 5     | 3     | 3     | 3     | 3     | 3     |
| Aquatic Toxicity Rule (alerts)          | 2     | 2     | 3     | 2     | 2     | 2     | 2     | 2     |
| Non Biodegradable Rule (alerts)         | 1     | 1     | 1     | 1     | 1     | 3     | 3     | 3     |
| LD <sub>50</sub> (oral)                 | 0     | 0     | 0     | 0     | 0     | 0     | 0     | 0     |
| SureChEMBL                              | 2     | 2     | 3     | 2     | 2     | 2     | 2     | 4     |

Table 4. ADMETox data for oxime 4 and its acyl derivatives 7a – 7g

| Favorable value                                |  | Moderately favorable value |  | Nonfavorable value |    |    | Neutral value |    |    |    |    |
|------------------------------------------------|--|----------------------------|--|--------------------|----|----|---------------|----|----|----|----|
|                                                |  |                            |  |                    |    |    |               |    |    |    |    |
| Physicochemical Properties<br>(optimal values) |  |                            |  | Compound number    |    |    |               |    |    |    |    |
|                                                |  |                            |  | 4                  | 7a | 7b | 7c            | 7d | 7e | 7f | 7g |

|                                                |                          |                          |                          |                          |                          |                          |                          |                          |
|------------------------------------------------|--------------------------|--------------------------|--------------------------|--------------------------|--------------------------|--------------------------|--------------------------|--------------------------|
| Molecular Weight (100 ~ 600)                   | 538.410                  | 580.420                  | 614.390                  | 594.440                  | 642.440                  | 687.420                  | 687.420                  | 732.410                  |
| Volume                                         | 585.736                  | 626.482                  | 641.693                  | 643.778                  | 696.496                  | 722.437                  | 722.437                  | 748.377                  |
| Density                                        | 0.919                    | 0.926                    | 0.957                    | 0.923                    | 0.922                    | 0.952                    | 0.952                    | 0.979                    |
| nHA (0 ~ 12)                                   | 5                        | 6                        | 6                        | 6                        | 6                        | 9                        | 9                        | 12                       |
| nHD (0 ~ 7)                                    | 1                        | 0                        | 0                        | 0                        | 0                        | 0                        | 0                        | 0                        |
| nRot (0 ~ 11)                                  | 2                        | 4                        | 5                        | 5                        | 5                        | 6                        | 6                        | 7                        |
| nRing (0 ~ 6)                                  | 6                        | 6                        | 6                        | 6                        | 7                        | 7                        | 7                        | 7                        |
| maxRing (0 ~ 18)                               | 22                       | 22                       | 22                       | 22                       | 22                       | 22                       | 22                       | 22                       |
| nHet (1 ~ 15)                                  | 5                        | 6                        | 7                        | 6                        | 6                        | 9                        | 9                        | 12                       |
| fChar (-4 ~ +4)                                | 0                        | 0                        | 0                        | 0                        | 0                        | 0                        | 0                        | 0                        |
| nRig (0 ~ 30)                                  | 34                       | 35                       | 35                       | 35                       | 41                       | 42                       | 42                       | 43                       |
| Flexibility ( $\leq 2$ )                       | 0.059                    | 0.114                    | 0.143                    | 0.143                    | 0.122                    | 0.143                    | 0.143                    | 0.163                    |
| Stereo Centers ( $\leq 2$ )                    | 7                        | 7                        | 7                        | 7                        | 7                        | 7                        | 7                        | 7                        |
| tPSA (0 ~ 140)                                 | 62.130                   | 68.200                   | 68.200                   | 68.200                   | 68.200                   | 111.340                  | 111.340                  | 154.480                  |
| LogS (-4 ~ 0.5)                                | -5.897                   | -5.716                   | -6.067                   | -6.058                   | -6.770                   | -6.834                   | -6.922                   | -6.644                   |
| LogP (0 ~ 3)                                   | 5.448                    | 5.559                    | 5.786                    | 6.051                    | 6.873                    | 6.654                    | 6.740                    | 6.472                    |
| LogD (1 ~ 3)                                   | 4.145                    | 3.717                    | 3.643                    | 4.285                    | 4.940                    | 5.025                    | 5.078                    | 4.841                    |
| QED ( $> 0.67$ )                               | 0.214                    | 0.192                    | 0.141                    | 0.189                    | 0.188                    | 0.135                    | 0.135                    | 0.126                    |
| SA score ( $< 6$ )                             | 4.859                    | 4.931                    | 5.013                    | 4.964                    | 4.848                    | 4.985                    | 4.964                    | 5.139                    |
| Fsp3 ( $\geq 0.420$ )                          | 0.882                    | 0.861                    | 0.861                    | 0.865                    | 0.732                    | 0.732                    | 0.732                    | 0.732                    |
| MCE-18 ( $\geq 45$ )                           | 116.906                  | 118.209                  | 118.209                  | 117.333                  | 175.099                  | 182.394                  | 182.394                  | 189.690                  |
| NP score (-5 ~ 5)                              | 2.014                    | 1.866                    | 1.739                    | 1.777                    | 1.504                    | 1.126                    | 1.203                    | 1.138                    |
| Lipinski Rule                                  | R                        | R                        | R                        | R                        | R                        | R                        | R                        | R                        |
| Pfizer Rule                                    | R                        | R                        | R                        | R                        | R                        | A                        | A                        | A                        |
| GSK Rule                                       | R                        | R                        | R                        | R                        | R                        | R                        | R                        | R                        |
| Golden Triangle                                | R                        | R                        | R                        | R                        | R                        | R                        | R                        | R                        |
| PAINS (alerts)                                 | 0                        | 0                        | 0                        | 0                        | 0                        | 0                        | 0                        | 0                        |
| ALARM NMR (alerts)                             | 0                        | 0                        | 0                        | 0                        | 0                        | 1                        | 1                        | 1                        |
| BMS (alerts)                                   | 1                        | 0                        | 2                        | 0                        | 0                        | 0                        | 0                        | 0                        |
| Chelator Rule (alerts)                         | 0                        | 0                        | 0                        | 0                        | 0                        | 0                        | 0                        | 0                        |
| Caco-2 Permeability ( $> -5.15$ )              | -5.255                   | -5.044                   | -5.310                   | -5.008                   | -5.032                   | -5.070                   | -5.076                   | -5.095                   |
| MDCK Permeability ( $< 2 \times 10^{-6}$ cm/s) | 6.59<br>$\times 10^{-6}$ | 1.17<br>$\times 10^{-5}$ | 7.56<br>$\times 10^{-6}$ | 1.14<br>$\times 10^{-5}$ | 1.71<br>$\times 10^{-5}$ | 4.86<br>$\times 10^{-5}$ | 4.43<br>$\times 10^{-5}$ | 1.46<br>$\times 10^{-5}$ |
| Pgp-inhibitor (0 – 0.300)                      | 0.138                    | 0.165                    | 0.066                    | 0.108                    | 0.911                    | 0.677                    | 0.632                    | 0.288                    |
| Pgp-substrate (0 – 0.300)                      | 0.000                    | 0.000                    | 0.000                    | 0.000                    | 0.000                    | 0.000                    | 0.000                    | 0.000                    |
| HIA (0 – 0.300)                                | 0.010                    | 0.026                    | 0.036                    | 0.029                    | 0.005                    | 0.008                    | 0.008                    | 0.010                    |
| F <sub>20%</sub> (0 – 0.300)                   | 0.911                    | 0.640                    | 0.692                    | 0.431                    | 0.714                    | 0.827                    | 0.834                    | 0.907                    |
| F <sub>30%</sub> (0 – 0.300)                   | 0.962                    | 0.946                    | 0.953                    | 0.934                    | 0.853                    | 0.624                    | 0.619                    | 0.319                    |
| PPB ( $< 90\%$ )                               | 97.070                   | 93.941                   | 97.541                   | 96.532                   | 98.903                   | 99.857                   | 99.682                   | 100.339                  |
| VD (0.04 – 20 L/kg)                            | 1.259                    | 1.383                    | 1.004                    | 0.928                    | 1.441                    | 1.277                    | 1.284                    | 1.418                    |
| BBB Penetration (0 – 0.300)                    | 0.227                    | 0.293                    | 0.462                    | 0.215                    | 0.048                    | 0.063                    | 0.048                    | 0.145                    |
| Fu (5 – 20%)                                   | 2.270                    | 2.638                    | 2.228                    | 2.060                    | 1.633                    | 1.253                    | 1.438                    | 1.236                    |

|                                         |       |       |       |       |       |       |       |       |
|-----------------------------------------|-------|-------|-------|-------|-------|-------|-------|-------|
| CYP1A2 inhibitor                        | 0.011 | 0.008 | 0.011 | 0.009 | 0.019 | 0.022 | 0.018 | 0.027 |
| CYP1A2 substrate                        | 0.740 | 0.429 | 0.506 | 0.481 | 0.482 | 0.674 | 0.710 | 0.790 |
| CYP2C19 inhibitor                       | 0.162 | 0.093 | 0.146 | 0.124 | 0.151 | 0.214 | 0.177 | 0.284 |
| CYP2C19 substrate                       | 0.833 | 0.939 | 0.939 | 0.941 | 0.938 | 0.879 | 0.884 | 0.696 |
| CYP2C9 inhibitor                        | 0.452 | 0.215 | 0.255 | 0.260 | 0.247 | 0.330 | 0.253 | 0.411 |
| CYP2C9 substrate                        | 0.201 | 0.155 | 0.178 | 0.187 | 0.372 | 0.492 | 0.656 | 0.305 |
| CYP2D6 inhibitor                        | 0.069 | 0.056 | 0.059 | 0.049 | 0.145 | 0.266 | 0.150 | 0.262 |
| CYP2D6 substrate                        | 0.163 | 0.150 | 0.131 | 0.141 | 0.179 | 0.227 | 0.286 | 0.147 |
| CYP3A4 inhibitor                        | 0.872 | 0.770 | 0.866 | 0.858 | 0.830 | 0.868 | 0.759 | 0.903 |
| CYP3A4 substrate                        | 0.793 | 0.822 | 0.850 | 0.857 | 0.741 | 0.617 | 0.630 | 0.446 |
| CL (>15 mL/min/kg)                      | 1.983 | 1.897 | 2.732 | 3.237 | 3.982 | 3.753 | 3.491 | 3.768 |
| T <sub>1/2</sub> (0 – 0.300)            | 0.032 | 0.026 | 0.045 | 0.023 | 0.012 | 0.013 | 0.009 | 0.023 |
| hERG Blockers (0 – 0.300)               | 0.015 | 0.005 | 0.009 | 0.007 | 0.011 | 0.043 | 0.057 | 0.114 |
| H-HT (0 – 0.300)                        | 0.406 | 0.261 | 0.075 | 0.266 | 0.186 | 0.267 | 0.247 | 0.423 |
| DILI (0 – 0.3)                          | 0.011 | 0.020 | 0.031 | 0.017 | 0.021 | 0.033 | 0.036 | 0.069 |
| AMESToxicity (0 – 0.300)                | 0.002 | 0.002 | 0.006 | 0.002 | 0.002 | 0.009 | 0.012 | 0.123 |
| Rat Oral Acute Toxicity (0 – 0.300)     | 0.057 | 0.132 | 0.198 | 0.106 | 0.082 | 0.119 | 0.151 | 0.302 |
| FDAMDD (0 – 0.300)                      | 0.486 | 0.462 | 0.567 | 0.544 | 0.447 | 0.564 | 0.584 | 0.666 |
| Skin Sensitization (0 – 0.300)          | 0.022 | 0.036 | 0.133 | 0.039 | 0.089 | 0.104 | 0.107 | 0.314 |
| Carcinogenicity (0 – 0.300)             | 0.068 | 0.088 | 0.480 | 0.078 | 0.037 | 0.274 | 0.337 | 0.675 |
| Eye Corrosion (0 – 0.300)               | 0.003 | 0.003 | 0.011 | 0.003 | 0.003 | 0.003 | 0.003 | 0.003 |
| Eye Irritation(0 – 0.300)               | 0.009 | 0.009 | 0.010 | 0.008 | 0.010 | 0.008 | 0.008 | 0.010 |
| Respiratory Toxicity (0 – 0.300)        | 0.951 | 0.904 | 0.974 | 0.814 | 0.722 | 0.825 | 0.841 | 0.888 |
| Bioconcentration Factors                | 2.822 | 2.962 | 2.403 | 2.752 | 2.686 | 2.556 | 2.454 | 2.158 |
| IGC <sub>50</sub>                       | 4.620 | 4.702 | 5.045 | 4.715 | 5.208 | 5.222 | 5.265 | 5.167 |
| LC <sub>50</sub> FM                     | 5.253 | 5.676 | 5.971 | 5.551 | 5.898 | 6.017 | 6.082 | 6.161 |
| LC <sub>50</sub> DM                     | 5.666 | 5.947 | 6.117 | 5.970 | 6.075 | 6.142 | 6.201 | 6.131 |
| NR-AR (0 – 0.300)                       | 0.031 | 0.025 | 0.017 | 0.052 | 0.020 | 0.068 | 0.055 | 0.275 |
| NR-AR-LBD (0 – 0.300)                   | 0.715 | 0.422 | 0.697 | 0.422 | 0.057 | 0.745 | 0.766 | 0.850 |
| NR-AhR (0 – 0.300)                      | 0.002 | 0.002 | 0.002 | 0.001 | 0.003 | 0.006 | 0.006 | 0.018 |
| NR-Aromatase (0 – 0.300)                | 0.707 | 0.762 | 0.762 | 0.701 | 0.631 | 0.744 | 0.780 | 0.817 |
| NR-ER (0 – 0.300)                       | 0.880 | 0.766 | 0.858 | 0.787 | 0.883 | 0.885 | 0.896 | 0.884 |
| NR-ER-LBD (0 – 0.300)                   | 0.721 | 0.697 | 0.830 | 0.758 | 0.783 | 0.801 | 0.850 | 0.895 |
| NR-PPAR gamma (0 – 0.300)               | 0.913 | 0.498 | 0.895 | 0.626 | 0.621 | 0.909 | 0.926 | 0.949 |
| SR-ARE (0 – 0.300)                      | 0.750 | 0.841 | 0.867 | 0.782 | 0.755 | 0.854 | 0.863 | 0.905 |
| SR-ATAD5 (0 – 0.300)                    | 0.192 | 0.131 | 0.235 | 0.042 | 0.049 | 0.096 | 0.106 | 0.323 |
| SR-HSE (0 – 0.300)                      | 0.622 | 0.612 | 0.746 | 0.495 | 0.583 | 0.067 | 0.651 | 0.776 |
| SR-MMP (0 – 0.300)                      | 0.863 | 0.738 | 0.833 | 0.670 | 0.809 | 0.894 | 0.900 | 0.940 |
| SR-p53 (0 – 0.300)                      | 0.222 | 0.503 | 0.717 | 0.203 | 0.171 | 0.401 | 0.493 | 0.872 |
| Toxicophores                            | 2     | 1     | 2     | 1     | 1     | 3     | 3     | 3     |
| Genotoxic Carcinogenicity Rule (alerts) | 2     | 0     | 4     | 0     | 0     | 5     | 5     | 5     |
| Non Genotoxic Carcinogen. Rule (alerts) | 0     | 0     | 1     | 0     | 0     | 0     | 0     | 0     |

|                                  |   |   |   |   |   |   |   |   |
|----------------------------------|---|---|---|---|---|---|---|---|
| Skin Sensitization Rule (alerts) | 0 | 0 | 2 | 0 | 0 | 0 | 0 | 0 |
| Aquatic Toxicity Rule (alerts)   | 0 | 0 | 1 | 0 | 0 | 0 | 0 | 0 |
| Non Biodegradable Rule (alerts)  | 1 | 1 | 1 | 1 | 1 | 3 | 3 | 3 |
| LD <sub>50</sub> (oral)          | 0 | 0 | 0 | 0 | 0 | 0 | 0 | 0 |
| SureChEMBL                       | 2 | 2 | 3 | 2 | 2 | 2 | 2 | 4 |

#### Additional Information:

**Physicochemical Properties:** **Molecular Weight:** optimal:100~600. **Volume** = Van der Waals volume. **Density** = MW / volume. **nHA** = number of hydrogen bond acceptors; optimal: 0 ~ 12. **nHD** = number of hydrogen bond donors; optimal: 0 ~ 7. **nRot** = number of rotatable bonds; optimal: 0 ~ 11. **nRing** = number of rings; optimal: 0 ~ 6. **MaxRing** = number of atoms in the biggest ring; optimal: 0 ~ 18. **nHet** = number of heteroatoms; optimal: 1 ~ 15. **fChar** = formal charge; optimal: -4 ~ 4. **nRig** = number of rigid bonds; optimal: 0 ~ 30. **Flexibility** = nRot / nRig. **Stereo Centers:** optimal: ≤ 2. **tPSA** = Topological Polar Surface Area; optimal: 0 ~ 140. **logS** = log of the aqueous solubility; optimal: -4 ~ 0.5 log mol/L. **logP** = log of the octanol/water partition coefficient; optimal: 0 ~ 3. **logD** = logP at physiological pH 7.4; optimal: 1 ~ 3.

**Medicinal Chemistry:** **QED:** a measure of drug-likeness based on the concept of desirability; attractive: > 0.67; unattractive: 0.49 ~ 0.67; too complex: < 0.34. **SAscore** = synthetic accessibility score is designed to estimate ease of synthesis of drug-like molecules. SAscore ≥ 6, difficult to synthesize; SAscore < 6, easy to synthesize. **Fsp<sup>3</sup>** = the number of sp<sup>3</sup> hybridized carbons / total carbon count, correlating with melting point and solubility. Fsp<sup>3</sup> ≥ 0.42 is considered a suitable value. **MCE-18** = stands for medicinal chemistry evolution. MCE-18 ≥ 45 is considered a suitable value. **NPscore** = Natural product-likeness score. This score is typically in the range from -5 to 5. The higher the score is, the higher the probability is that the molecule is a NP. **Lipinski Rule:** MW ≤ 500; logP ≤ 5; Hacc ≤ 10; Hdon ≤ 5. If two properties are out of range, a poor absorption or permeability is possible, one is acceptable. **Pfizer Rule:** logP > 3; TPSA < 75. Compounds with a high log P (> 3) and low TPSA (< 75) are likely to be toxic. **GSK Rule:** MW ≤ 400; logP ≤ 4. Compounds satisfying the GSK rule may have a more favorable ADMET profile. **Golden Triangle:** 200 ≤ MW ≤ 500; -2 ≤ logD ≤ 5. Compounds satisfying the Golden Triangle rule may have a more favorable ADMET profile. **PAINS** = Pan Assay Interference Compounds, frequent hitters, Alpha-screen artifacts and reactive compound. **ALARM NMR:** Thiol reactive compounds. **BMS:** Undesirable, reactive compounds. **Chelator Rule:** Chelating compounds.

**Absorption:** **Caco-2 Permeability:** Optimal: higher than -5.15 Log unit. **MDCK Permeability:** low permeability: < 2 × 10<sup>-6</sup> cm/s, medium permeability: 2–20 × 10<sup>-6</sup> cm/s, high passive permeability: > 20 × 10<sup>-6</sup> cm/s. **Pgp-inhibitor:** The output value is the probability of being Pgp-inhibitor. **Pgp-subst.:** The output value is the probability of being Pgp-subst.. **HIA** = Human Intestinal Absorption; Category 1: HIA+ (HIA < 30%); Category 0: HIA- (HIA < 30%); The output value is the probability of being HIA+. **F<sub>20%</sub>** = 20% Bioavailability; Category 1: F<sub>20%</sub>+ (bioavailability < 20%); Category 0: F<sub>20%</sub>- (bioavailability ≥ 20%); The output value is the probability of being F<sub>20%</sub>+. **F<sub>30%</sub>** = 30% Bioavailability; Category 1: F<sub>30%</sub>+ (bioavailability < 30%); Category 0: F<sub>30%</sub>- (bioavailability ≥ 30%); The output value is the probability of being F<sub>30%</sub>+.

**Distribution:** **PPB** = Plasma Protein Binding; ptimal: < 90%. Drugs with high protein-bound may have a low therapeutic index. **VD** = Volume Distribution; Optimal: 0.04 – 20 L/kg. **BBB Penetration** = Blood-Brain Barrier Penetration; Category 1: BBB+; Category 0: BBB-; The output value is the probability of being BBB+. **Fu** = The fraction unbound in plasms; Low: < 5%; Middle: 5 ~ 20%; High: > 20%.

**Metabolism:** CYP1A2 inhibitor, CYP1A2 subst., etc.: Category 1: Inhibitor; Category 0: Non-inhibitor; The output value is the probability of being inhibitor / subst..

**Excretion:** CL = Clearance; High: >15 mL/min/kg; moderate: 5 – 15 mL/min/kg; low: < 5 mL/min/kg.  $T_{1/2}$  = half-life time; long half-life: >3h; short half-life: < 3h; The output value is the probability of having long half-life.

**Toxicity:** **hERG Blockers**, **H-HT**, etc: The output value is the probability of being active. **H-HT** = Human Hepatotoxicity. **DILI** = Drug Induced Liver Injury. **FDAMDD** = Maximum Recommended Daily Dose.

**Environmental toxicity:** **Bioconcentration Factors** – are used for considering secondary poisoning potential and assessing risks to human health via the food chain. The unit is  $-\log_{10}[(\text{mg/L})/(1000 \cdot \text{MW})]$ . **IGC<sub>50</sub>** – *Tetrahymena pyriformis* 50 percent growth inhibition concentration. The unit is  $-\log_{10}[(\text{mg/L})/(1000 \cdot \text{MW})]$ . **LC<sub>50</sub>FM** – 96-hour fathead minnow 50 percent lethal concentration. The unit is  $-\log_{10}[(\text{mg/L})/(1000 \cdot \text{MW})]$ . **LC<sub>50</sub>DM** – 48-hour daphnia magna 50 percent lethal concentration. The unit is  $-\log_{10}[(\text{mg/L})/(1000 \cdot \text{MW})]$ .

**Tox21 pathway:** **NR-AR**, **NR-AR-LBD**, etc - The output value is the probability of being active. **NR-AR** = Androgen receptor. **NR-AR-LBD** = Androgen receptor ligand-binding domain. **NR-AhR** = Aryl hydrocarbon receptor. **NR-ER** = Estrogen receptor. **NR-ER-LBD** = Estrogen receptor ligand-binding domain. **NR-PPARgamma** = Peroxisome proliferator-activated receptor gamma. **SR-ARE** = Antioxidant response element. **SR-ATAD5** = ATPase family AAA domain-containing protein 5. **SR-HSE** = Heat shock factor response element. **SR-MMP** = Mitochondrial membrane potential.

**Toxicophore Rules:** **Acute Toxicity Rule** = acute toxicity during oral administration. **Genotoxic Carcinogenicity Rule** = carcinogenicity or mutagenicity. **NonGenotoxic Carcinogenicity Rule** = carcinogenicity through nongenotoxic mechanisms. **Skin Sensitization Rule** = skin irritation. **Aquatic Toxicity Rule** = toxicity to liquid(water). **NonBiodegradable Rule** = compound is non-biodegradable. **SureChEMBL Rule** = MedChem unfriendly status.
