# Supplementary material for: Acylation of Oleanolic Acid Oximes Effectively Improves Cytotoxic Activity in In Vitro Studies
Source: MDPI journal article supplement (doi:10.3390/pharmaceutics16010086), 2024-01-09
Supplement: s1 [file s1]

Article

# Acylation of Oleanolic Acid Oximes Effectively Improves Cytotoxic Activity in In Vitro Studies

Barbara Bednarczyk-Cwynar and Piotr Ruszkowski

**Supplementary Materials SM.S1.** The detailed results of SAR analysis

**Table S1.** Predicted activity of oleanolic acid (**1**) its oximes (**2** – **4**) and their acyllderivatives (**5a** – **5g**, **6a** – **6g** and **7a** – **7g**) determined by the PASS method.

**Legend:** *P<sub>a</sub>* – probability of activity; *P<sub>i</sub>* – probability of inactivity; *inh.* – inhibitor; *stim.* – stimulator; *antag.* – antagonist, *TF NF* – transcription factor, *Membr.* – membrane

| 1.000 – 0.950                                                                      |                      |                |                | 0.949 – 0.900                                                                |                   | 0.899 – 0.850   |                 | 0.849 – 0.800    |                  | 0.799 – 0.750           |                       | 0.749 – 0.700       |               | < 0.700 |  |
|------------------------------------------------------------------------------------|----------------------|----------------|----------------|------------------------------------------------------------------------------|-------------------|-----------------|-----------------|------------------|------------------|-------------------------|-----------------------|---------------------|---------------|---------|--|
| Compound structure                                                                 |                      |                |                | P <sub>a</sub> factor (and P <sub>i</sub> factor) for P <sub>a</sub> ≥ 0.700 |                   |                 |                 |                  |                  |                         |                       |                     |               |         |  |
|                                                                                    |                      |                |                |                                                                              |                   |                 |                 |                  |                  |                         |                       |                     |               |         |  |
| 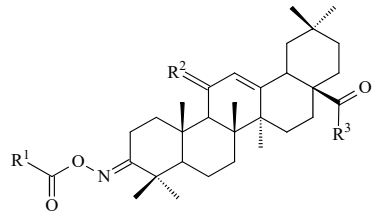 |                      |                |                | Antineoplastic                                                               | Apoptosis agonist | Caspase 3 stim. | Caspase 8 stim. | Hepatoprotectant | Insulin promoter | Membr. integrity antag. | Oxidoreductase inhib. | TF NF kappa B stim. | TF stim.      |         |  |
| Comp. No.                                                                          | R <sup>1</sup>       | R <sup>2</sup> | R <sup>3</sup> |                                                                              |                   |                 |                 |                  |                  |                         |                       |                     |               |         |  |
| 2                                                                                  | H                    |                |                | 0.824 (0.009)                                                                | 0.855 (0.005)     | 0.952 (0.003)   | 0.745 (0.003)   | 0.747 (0.005)    | 0.776 (0.004)    | 0.797 (0.007)           | < 0.700               | 0.896 (0.002)       | 0.896 (0.002) |         |  |
| 5a                                                                                 | CH <sub>3</sub> -    | H <sub>2</sub> | OMe            | 0.730 (0.021)                                                                | 0.769 (0.010)     | 0.777 (0.007)   | 0.761 (0.002)   | 0.757 (0.005)    | 0.743 (0.005)    | 0.813 (0.006)           | < 0.700               | 0.886 (0.002)       | 0.886 (0.002) |         |  |
| 5b                                                                                 | Cl-CH <sub>2</sub> - |                |                | 0.809 (0.011)                                                                | 0.747 (0.011)     | < 0.700         | < 0.700         | < 0.700          | < 0.700          | < 0.700                 | 0.732 (0.012)         | 0.873 (0.002)       | 0.873 (0.002) |         |  |

|    |                                                         |                |     |               |               |               |               |               |               |               |               |               |               |
|----|---------------------------------------------------------|----------------|-----|---------------|---------------|---------------|---------------|---------------|---------------|---------------|---------------|---------------|---------------|
| 5c | CH <sub>3</sub> -CH <sub>2</sub> -                      | O              | OMe | < 0.700       | 0.720 (0.013) | 0.712 (0.010) | 0.738 (0.003) | 0.727 (0.006) | 0.751 (0.004) | 0.792 (0.007) | < 0.700       | 0.878 (0.002) | 0.878 (0.002) |
| 5d | C <sub>6</sub> H <sub>5</sub> -                         |                |     | < 0.700       | 0.809 (0.008) | 0.774 (0.007) | 0.715 (0.003) | 0.716 (0.007) | 0.775 (0.004) | 0.777 (0.008) | < 0.700       | 0.884 (0.002) | 0.884 (0.002) |
| 5e | 2-NO <sub>2</sub> -C <sub>6</sub> H <sub>4</sub> -      |                |     | < 0.700       | 0.748 (0.011) | 0.739 (0.009) | < 0.700       | < 0.700       | < 0.700       | < 0.700       | < 0.700       | 0.848 (0.002) | 0.848 (0.002) |
| 5f | 4-NO <sub>2</sub> -C <sub>6</sub> H <sub>4</sub> -      |                |     | < 0.700       | 0.801 (0.008) | 0.794 (0.006) | 0.716 (0.003) | 0.775 (0.005) | < 0.700       | 0.764 (0.009) | < 0.700       | 0.867 (0.002) | 0.867 (0.002) |
| 5g | 2,4-di-NO <sub>2</sub> -C <sub>6</sub> H <sub>3</sub> - |                |     | < 0.700       | 0.762 (0.010) | 0.762 (0.008) | < 0.700       | 0.737 (0.006) | < 0.700       | < 0.700       | < 0.700       | 0.834 (0.002) | 0.834 (0.002) |
| 3  | H                                                       | O              | OMe | 0.828 (0.009) | 0.858 (0.005) | 0.885 (0.004) | < 0.700       | 0.742 (0.006) | < 0.700       | < 0.700       | < 0.700       | 0.883 (0.002) | 0.883 (0.002) |
| 6a | CH <sub>3</sub> -                                       |                |     | 0.741 (0.020) | 0.781 (0.009) | < 0.700       | < 0.700       | 0.752 (0.005) | < 0.700       | < 0.700       | 0.735 (0.012) | 0.872 (0.002) | 0.872 (0.002) |
| 6b | Cl-CH <sub>2</sub> -                                    |                |     | 0.814 (0.010) | 0.758 (0.010) | < 0.700       | < 0.700       | < 0.700       | < 0.700       | < 0.700       | 0.804 (0.006) | 0.858 (0.002) | 0.858 (0.002) |
| 6c | CH <sub>3</sub> -CH <sub>2</sub> -                      |                |     | < 0.700       | 0.733 (0.012) | < 0.700       | < 0.700       | 0.720 (0.007) | < 0.700       | < 0.700       | < 0.700       | 0.864 (0.002) | 0.864 (0.002) |
| 6d | C <sub>6</sub> H <sub>5</sub> -                         |                |     | 0.706 (0.025) | 0.815 (0.007) | < 0.700       | < 0.700       | 0.709 (0.007) | < 0.700       | < 0.700       | 0.715 (0.014) | 0.870 (0.002) | 0.870 (0.002) |
| 6e | 2-NO <sub>2</sub> -C <sub>6</sub> H <sub>4</sub> -      |                |     | < 0.700       | 0.758 (0.010) | < 0.700       | < 0.700       | < 0.700       | < 0.700       | < 0.700       | 0.766 (0.009) | 0.832 (0.002) | 0.832 (0.002) |
| 6f | 4-NO <sub>2</sub> -C <sub>6</sub> H <sub>4</sub> -      |                |     | 0.703 (0.026) | 0.811 (0.007) | < 0.700       | < 0.700       | 0.768 (0.005) | < 0.700       | < 0.700       | 0.733 (0.012) | 0.857 (0.002) | 0.857 (0.002) |
| 6g | 2,4-di-NO <sub>2</sub> -C <sub>6</sub> H <sub>3</sub> - |                |     | 0.706 (0.025) | 0.776 (0.009) | < 0.700       | < 0.700       | 0.728 (0.006) | < 0.700       | < 0.700       | 0.751 (0.010) | 0.823 (0.002) | 0.823 (0.002) |
| 4  | H                                                       | H <sub>2</sub> | Mor | 0.819 (0.010) | 0.795 (0.008) | < 0.700       | < 0.700       | < 0.700       | < 0.700       | < 0.700       | < 0.700       | 0.819 (0.002) | 0.819 (0.002) |
| 7a | CH <sub>3</sub> -                                       |                |     | 0.724 (0.022) | < 0.700       | < 0.700       | < 0.700       | < 0.700       | < 0.700       | < 0.700       | < 0.700       | 0.802 (0.003) | 0.802 (0.003) |
| 7b | Cl-CH <sub>2</sub> -                                    |                |     | 0.798 (0.012) | < 0.700       | < 0.700       | < 0.700       | < 0.700       | < 0.700       | < 0.700       | < 0.700       | 0.785 (0.003) | 0.785 (0.003) |
| 7c | CH <sub>3</sub> -CH <sub>2</sub> -                      |                |     | < 0.700       | < 0.700       | < 0.700       | < 0.700       | < 0.700       | < 0.700       | < 0.700       | < 0.700       | 0.793 (0.003) | 0.793 (0.003) |
| 7d | C <sub>6</sub> H <sub>5</sub> -                         |                |     | < 0.700       | 0.710 (0.014) | < 0.700       | < 0.700       | < 0.700       | < 0.700       | < 0.700       | < 0.700       | 0.797 (0.003) | 0.797 (0.003) |
| 7e | 2-NO <sub>2</sub> -C <sub>6</sub> H <sub>4</sub> -      |                |     | < 0.700       | < 0.700       | < 0.700       | < 0.700       | < 0.700       | < 0.700       | < 0.700       | < 0.700       | 0.755 (0.003) | 0.755 (0.003) |
| 7f | 4-NO <sub>2</sub> -C <sub>6</sub> H <sub>4</sub> -      |                |     | < 0.700       | 0.710 (0.014) | < 0.700       | < 0.700       | < 0.700       | < 0.700       | < 0.700       | < 0.700       | 0.781 (0.003) | 0.781 (0.003) |
| 7g | 2,4-di-NO <sub>2</sub> -C <sub>6</sub> H <sub>3</sub> - |                |     | < 0.700       | < 0.700       | < 0.700       | < 0.700       | < 0.700       | < 0.700       | < 0.700       | < 0.700       | 0.745 (0.004) | 0.745 (0.004) |
